# Supplementary material for: Multifactorial correlates of blood pressure in South Asian children in Canada: a cross-sectional study
Source: PubMed Central journal article supplement — BMJ Open. 2019 Apr 8;9(4):e027844. doi: 10.1136/bmjopen-2018-027844 (PMC6500289; doi:10.1136/bmjopen-2018-027844), 2019-04-08
Supplement: bmjopen-2018-027844.draft_revisions.pdf [file bmjopen-2018-027844.draft_revisions.pdf]

# BMJ Open

BMJ Open is committed to open peer review. As part of this commitment we make the peer review history of every article we publish publicly available.

When an article is published we post the peer reviewers' comments and the authors' responses online. We also post the versions of the paper that were used during peer review. These are the versions that the peer review comments apply to.

The versions of the paper that follow are the versions that were submitted during the peer review process. They are not the versions of record or the final published versions. They should not be cited or distributed as the published version of this manuscript.

BMJ Open is an open access journal and the full, final, typeset and author-corrected version of record of the manuscript is available on our site with no access controls, subscription charges or pay-per-view fees (<http://bmjopen.bmj.com>).

If you have any questions on BMJ Open's open peer review process please email [info.bmjopen@bmj.com](mailto:info.bmjopen@bmj.com)

# BMJ Open

## Multifactorial correlates of blood pressure in South Asian children: a cross-sectional study

|                               |                                                                                                                                                                                                                                                                                                                                                                                                                                                                                                                                                                                                                                                                                                                                              |
|-------------------------------|----------------------------------------------------------------------------------------------------------------------------------------------------------------------------------------------------------------------------------------------------------------------------------------------------------------------------------------------------------------------------------------------------------------------------------------------------------------------------------------------------------------------------------------------------------------------------------------------------------------------------------------------------------------------------------------------------------------------------------------------|
| Journal:                      | <i>BMJ Open</i>                                                                                                                                                                                                                                                                                                                                                                                                                                                                                                                                                                                                                                                                                                                              |
| Manuscript ID                 | bmjopen-2018-027844                                                                                                                                                                                                                                                                                                                                                                                                                                                                                                                                                                                                                                                                                                                          |
| Article Type:                 | Research                                                                                                                                                                                                                                                                                                                                                                                                                                                                                                                                                                                                                                                                                                                                     |
| Date Submitted by the Author: | 13-Nov-2018                                                                                                                                                                                                                                                                                                                                                                                                                                                                                                                                                                                                                                                                                                                                  |
| Complete List of Authors:     | Fowokan, Adeleke; Simon Fraser University, Department of Biomedical Physiology and Kinesiology<br>Punthakee, Zubin; McMaster University, Medicine<br>Waddell, Charlotte; Simon Fraser University, Faculty of Health Sciences<br>Rosin, Miriam; Simon Fraser University, Department of Biomedical Physiology and Kinesiology<br>Morrison, Katherine; McMaster University Department of Medicine<br>Gupta, Milan; McMaster University Department of Medicine<br>Rangarajan, Sumathy; Population Health Research Institute, Hamilton Health Sciences/McMaster University,<br>Teo, Koon; Population Health Research Institute, Hamilton Health Sciences/McMaster University,<br>Lear, Scott; Simon Fraser University, Faculty of Health Sciences |
| Keywords:                     | Hypertension < CARDIOLOGY, PAEDIATRICS, EPIDEMIOLOGY                                                                                                                                                                                                                                                                                                                                                                                                                                                                                                                                                                                                                                                                                         |
|                               |                                                                                                                                                                                                                                                                                                                                                                                                                                                                                                                                                                                                                                                                                                                                              |

SCHOLARONE™  
Manuscripts

**Multifactorial correlates of blood pressure in South Asian children: a cross-sectional study.**

Fowokan AO, MPH<sup>1</sup>, Punthakee Z, MD<sup>2</sup>, Waddell C, MD<sup>5</sup>, Rosin M, PhD<sup>1</sup>, Morrison K, MD<sup>2</sup>, Gupta M, MD<sup>2,3</sup>, Rangarajan S, MSc<sup>4</sup>, Teo K, MD<sup>2</sup>, Lear SA, PhD<sup>1, 5, 6</sup>

<sup>1</sup>Department of Biomedical Physiology and Kinesiology, Simon Fraser University, Burnaby, BC, Canada, V5A 1S6

<sup>2</sup>Department of Medicine, McMaster University and Population Health Research Institute, Hamilton, Ontario, Canada, L8S 4K1

<sup>3</sup>Canadian Collaborative Research Network, Brampton, ON, Canada, L6Z 4N5

<sup>4</sup>Population Health Research Institute, Hamilton, ON, Canada, L8L 2X2

<sup>5</sup>Faculty of Health Sciences, Simon Fraser University, Burnaby, BC, Canada, V5A 1S6

<sup>6</sup>Division of Cardiology, Providence Health Care, Vancouver, BC, Canada, V6Z 1Y6

**Running title: Correlates of blood pressure in South Asian children**

**Keywords:** South Asian, children, hypertension, risk factors

**Corresponding Author:** Adeleke Fowokan, MPH

Healthy Heart Program, St. Paul's Hospital

180-1081 Burrard St.

Vancouver, BC

Canada

V6Z 1Y6

E-mail: [afowokan@sfu.ca](mailto:afowokan@sfu.ca)

Word count: 4433 words

## ABSTRACT

**Objective:** South Asian adults are at greater risk for cardiovascular disease risk factors. In South Asian children, studies have documented higher blood pressure (BP) values and hypertension rates than in Caucasian children. To effectively address the burden of hypertension in this population, an understanding of associated factors is necessary. We sought to explore various correlates of BP and hypertension in South Asian children.

**Design:** Cross-sectional study

**Setting:** Community-based recruitment in two Canadian cities (Hamilton and Surrey)

**Participants:** South Asian children (n=762) from two Canadian cities provided a range of physiological, behavioural and social variables. Blood pressure was assessed using an automated device. Body mass index, waist circumference, waist-to-height ratio and BP were transformed to z-scores using published standards.

**Outcome measures:** Regression analyses were used to explore associations among the range of physiological, behavioural and social factors with BP z-scores and hypertension and to identify the factors that provided the best explanatory capacity for systolic and diastolic BP z-scores.

**Results:** A range of physiological, social and behavioural factors were associated with BP z-score and hypertension in unadjusted analysis; however, upon adjustment for covariates, the association between most social and behavioural factors attenuated while the association between the physiological factors remained. In stepwise regression, age, sex, BMI z-score, heart rate and weight accounted for 30% of the variance of BP z-score, while age, BMI z-score, heart rate and daily intake of fast foods accounted for 23% of the diastolic BP z-score variance.

1  
2  
3 **Conclusion:** Our findings suggest that physiological variables such as age, sex, height, adiposity,  
4 and heart rate provide stronger explanatory capacity to BP variance and hypertension risk than  
5  
6 other multifactorial variables in South Asian children.  
7  
8  
9  
10  
11  
12  
13  
14  
15  
16  
17  
18  
19  
20  
21  
22  
23  
24  
25  
26  
27  
28  
29  
30  
31  
32  
33  
34  
35  
36  
37  
38  
39  
40  
41  
42  
43  
44  
45  
46  
47  
48  
49  
50  
51  
52  
53  
54  
55  
56  
57  
58  
59  
60

For peer review only

## ARTICLE SUMMARY

### Strengths and limitations of this study

- The strengths of this study includes its large sample size of South Asian children and,
- Its examination of a wide range of physiological, behavioural and social risk factors in relation to BP z-scores and hypertension in South Asian children.
- Limitations of the study includes its cross-sectional design which limits the attribution of causality.

## INTRODUCTION

South Asians comprise approximately 25% of the world's global population<sup>1</sup> and represent a significant portion of the visible ethnic minority groups in countries such as Canada, the United Kingdom and the United States (US)<sup>2-4</sup>. Individuals of South Asian origin are known to be at increased risk of cardiovascular disease (CVD) relative to other ethnic groups in Western countries<sup>5,6</sup>. These differences in CVD risk have also been shown to be present in South Asian children, suggesting that the risk differential in CVD risk factors and events experienced by this ethnic group starts from an early age<sup>7</sup>.

One of the major physiological risk factors for CVDs is high blood pressure (BP) or hypertension<sup>8</sup>. Hypertension is also associated with an increased risk for stroke and kidney disease<sup>8</sup>. Moreover, multiple studies have shown that high BP in childhood typically continues into adulthood<sup>9</sup> — including in South Asian populations<sup>10</sup>. These findings suggest that it is essential to prevent hypertension in childhood in order to address the potential cardiovascular and metabolic sequelae later in life.

In South Asian children, studies have demonstrated increased prevalence of hypertension or higher BP levels relative to other ethnic groups<sup>11,12</sup>. While there is evidence suggesting a disproportionately higher BP burden for South Asians, the exact factors implicated are relatively unclear. Given the fact that causes of high BP are known to be multifactorial<sup>8</sup>, it is vital to understand the various risk factors that might be responsible for the increased risk of high BP in South Asian children in general. Using a range of multifactorial variables that were identified in a recently published systematic review of children to be correlated with BP and hypertension in other children population groups<sup>13</sup>, this study therefore aims: 1) to explore the associations

1  
2  
3 between physiological, lifestyle and socio-demographic factors and BP in South Asian children;  
4  
5 and 2) to identify the most important aggregate correlates of BP in South Asian children.  
6  
7

## 8 **METHODS**

### 9 **Study Design**

10  
11  
12  
13  
14  
15 Participants included in this study were recruited as part of the Research in International  
16  
17 Cardiovascular Health - Lifestyles, Environments and Genetic Attributes in Children and Youth  
18  
19 (RICH-LEGACY) study. This cross-sectional study is designed to investigate risk factors for  
20  
21 CVD across South Asian children in Canada. The study was approved by the Simon Fraser  
22  
23 University Research Ethics Board (REB), Providence Health Care REB, and the Hamilton  
24  
25 Integrated REB. Parents of participants provided written informed consent, while participants  
26  
27 assented to take part in the study.  
28  
29  
30

### 31 **Recruitment**

32  
33  
34  
35 Elementary school and high-school children (n= 762) were recruited using community-  
36  
37 based methods in two Canadian cities (Brampton, Ontario and Surrey, British Columbia) by  
38  
39 convenience sampling between 2012 and 2016. Elementary schools with a high rate of South  
40  
41 Asian enrolment were first identified by contacting the school boards. Once schools were  
42  
43 identified, packages containing an invitation letter, a RICH-LEGACY study description and  
44  
45 consent forms were sent to parents/guardians of children enrolled in the identified schools.  
46  
47 Information stands were also placed at the participating elementary schools before and after  
48  
49 school hours to reach out to parents with more information about the study. Additionally, the  
50  
51 study was advertised through venues used by South Asian groups including newspapers, local  
52  
53 television stations, community centres, worship centres and festivals. Inclusion criteria included:  
54  
55  
56  
57



1  
2  
3 children (in elementary or high school) having at least three grandparents of South Asian origin;  
4 and participants being able to provide consent (parents) and assent (children). Research assistants  
5  
6 fluent in Hindi and Punjabi were responsible for participant recruitment and data collection. The  
7  
8 research assistants who were involved in the measurements all undertook training together  
9  
10 through simulator sessions and were retrained if variations in measurement protocol were  
11  
12 observed by the research coordinator. This process was repeated for a few days to ensure  
13  
14 accuracy and consistency amongst the research assistants in the assessment of the measurements  
15  
16 collected in this study. In addition, written materials (including consent forms) were provided in  
17  
18 English, Punjabi, Hindi and Urdu as needed.  
19  
20  
21  
22  
23

### 24 **Participant Assessment**

25  
26  
27  
28 Participants for the RICH-LEGACY study were assessed regarding socio-demographic  
29  
30 variables including age, sex and parental education. In certain cases, parents or guardians helped  
31  
32 complete certain sections of the child's questionnaire. Children's perception of body image was  
33  
34 assessed using Stunkard's silhouettes, a rating scale from one to nine with increases related to  
35  
36 increased silhouette size<sup>14</sup>, that assesses perception of size and body dissatisfaction. This figure  
37  
38 rating scale has been shown to be a valid indicator of determining weight status in children<sup>15</sup>.  
39  
40 Feeding practices were assessed using the childhood feeding questionnaire<sup>16</sup>. Exposure to  
41  
42 bullying was assessed by asking participants if they had experienced bullying or violence at  
43  
44 school. This variable was assessed because of its role as a known stressor in children and its  
45  
46 possible impact on pathways known to be involved in BP regulation such as the hypothalamic-  
47  
48 pituitary-adrenal (HPA) axis<sup>17</sup>. Additionally, level of acculturation was assessed using the  
49  
50 Acculturation Rating Scale for Mexican Americans-II (ARSMA- II) adapted for use in South  
51  
52 Asians by Stigler *et al*<sup>18</sup>. This scale assesses an individual's identification with their heritage  
53  
54  
55  
56  
57

1  
2  
3 based on different domains including language preferences, media preferences, and preferences  
4 regarding food and other consumer goods using 24 questions<sup>18</sup>. The adapted questionnaire is  
5  
6 grouped into two scales: the Western scale and the traditional scale. The traditional acculturation  
7  
8 score measures children's acceptance of traditional Indian cultural attributes while the  
9  
10 Westernized acculturation score measures the degree to which South Asian children identify with  
11  
12 Western culture.  
13  
14  
15  
16

17  
18 Participants completed a semi-quantitative food frequency questionnaire (FFQ) that  
19  
20 assessed intake of fruits and vegetables and fast foods consumption. The FFQ was adapted from  
21  
22 the INTERHEART FFQ, which was validated in an international cohort that included South  
23  
24 Asians<sup>19</sup>. Physical activity was assessed using a questionnaire that quantified sports and other  
25  
26 activities including leisure, household chores and sedentary factors (screen time and homework)  
27  
28 during school and outside of school over the past month— with all activities then expressed as  
29  
30 metabolic-equivalent-of-task (MET) minutes. Self-reported exposure to second-hand smoke was  
31  
32 assessed to characterize children's passive exposure to smoking and defined as a minimum of  
33  
34 five consecutive minutes during which inhalation of other people's smoke occurs. Hand-grip  
35  
36 strength, a measure of muscular strength, was measured on the non-dominant hand by study  
37  
38 personnel with a Jamar dynamometer utilizing standardized protocol<sup>20</sup>.  
39  
40  
41  
42  
43

#### 44 **Anthropometric Characteristics**

45  
46 Height was measured to the nearest 0.1 cm using a right angle triangle and a calibrated  
47  
48 wall mounted scale. Weight was measured to the nearest 0.1 kg with the subject in light clothing  
49  
50 using an electronic scale. Body mass index (BMI) was first calculated from weight in kilograms  
51  
52 divided by height in meters squared before being converted to z-scores using WHO growth  
53  
54 references for young people aged 5-19 years<sup>21</sup>.  
55  
56  
57

1  
2  
3           Waist circumference (WC) was recorded in centimetres as the average of two measures  
4  
5 taken halfway between the lower rib margin and the iliac crest against the skin following a  
6  
7 normal expiration. Waist circumference was assessed using non-stretching measuring tape by  
8  
9 trained team members. Waist-to-height ratio (WtHR) was then calculated by dividing waist  
10  
11 circumference by height. Both WC and WtHR were transformed to z scores using recently-  
12  
13 published values for age and sex based on the third US National Health and Nutrition  
14  
15 Examination Survey (NHANES III)<sup>22</sup>. Transforming the anthropometric measures to z-scores  
16  
17 allowed for the standardized comparisons across populations of children of similar ages and sex.  
18  
19

### 20 21 **Blood Pressure and Heart Rate**

22  
23  
24           Blood pressure and heart rate were measured in the left arm using the Omron HEM-  
25  
26 711DLX automated blood pressure monitor with appropriate sized cuffs following 10 minutes of  
27  
28 seated rest. Three BP and heart rate measures were taken over a 10-minute period and the  
29  
30 average of the three was recorded. Subsequently, BP was transformed to standard deviation  
31  
32 scores and percentiles adjusted for age, sex and height according to the fourth National High  
33  
34 Blood Pressure Education Program (NHBPEP) working group in children and adolescents<sup>23</sup>.  
35  
36 Systolic and diastolic hypertension were defined using the NHBPEP recommendations as  
37  
38 average systolic blood pressure or diastolic blood pressure equal to or greater than the 95<sup>th</sup>  
39  
40 percentile for sex, age and height.  
41  
42  
43  
44

### 45 46 **Parental Variables**

47  
48  
49           Parents of the children recruited for this study provided information on parental education  
50  
51 (father's and mother's education). In a smaller subset of the South Asian children (n=271),  
52  
53 parental history of hypertension (yes or no) was assessed in order to explore the potential impact  
54  
55  
56  
57

1  
2  
3 of heritable factors on children's BP z-scores and hypertension. Socioeconomic status was  
4 determined according to father's education, owing to widely reported cultural influences on  
5 gender structures in the South Asian population<sup>24</sup>. Fathers' education levels were categorized as:  
6 those with no formal education; those with primary/secondary school education; those with a  
7 trade school degree/diploma; and those with a college or university degree. Parent's smoking  
8 status was self-reported and categorized as non-smoker, former smoker, or current smoker.  
9

### 18 **Statistical Analysis**

20  
21 All continuous variables were examined using P-P plots and found to be normally  
22 distributed. For descriptive analysis, continuous variables were presented as means and standard  
23 deviations while categorical variables were reported as counts and percentages. Independent t-  
24 test analysis was used to assess sex differences in continuous variables, while chi-square tests  
25 were used to assess sex differences in categorical variables.  
26  
27

28  
29  
30  
31  
32  
33 To explore the associations among the range of physiological, behavioural and  
34 sociodemographic variables with systolic and diastolic BP, unadjusted linear regression was  
35 used. These models were then adjusted for child age, sex and father's education. These  
36 confounders were selected based on their well –documented independent associations with the  
37 outcome variable in research studies. Although, the conversion to z-scores provides age and sex  
38 adjusted data, we chose to still include age and sex as confounders to adjust for potential residual  
39 effects because the growth chart used by the NHANES might not adequately reflect the growth  
40 profile of South Asian children. Similarly, unadjusted and adjusted (age, sex and father's  
41 education) logistic regression analysis was used to explore clinically-relevant associations among  
42 the multifactorial correlates with systolic and diastolic hypertension. To evaluate the independent  
43  
44  
45  
46  
47  
48  
49  
50  
51  
52  
53  
54  
55  
56  
57

1  
2  
3 effect of sex and age in the adjusted models, they were each removed from the list of covariates  
4  
5 when exploring their effect on BP z-scores and hypertension (i.e., sex was adjusted for age and  
6  
7 father's education), while age was adjusted for sex and father's education.  
8  
9

10  
11       Following linear regression, stepwise multiple linear regression analyses were used to  
12  
13 identify the combination of risk factors that best explained the variance in BP in South Asian  
14  
15 children. The stepwise regression method enables the identification of the aggregate combination  
16  
17 of correlates that has the highest contributory effect to the outcome variable. Specifically, for this  
18  
19 analysis, we utilized the backward method to select the list of multifactorial correlates that  
20  
21 provide significant contribution to the outcome (systolic and diastolic BP z-scores) using an  
22  
23 entry criterion of  $p < 0.05$  and a removal criterion of  $p > 0.10$ . The specific list of correlates (age,  
24  
25 sex, height, weight, heart rate, BMI z-score, WC z-score, WHtR z-score, parental history of  
26  
27 hypertension, parental education, exposure to bullying and violence, traditional and western  
28  
29 acculturation scores, physical activity in school and outside school, dietary variables and second-  
30  
31 hand smoking) considered for introduction in the backward stepwise regression model were  
32  
33 chosen *a priori* based on literature evidence<sup>13</sup> and whether they had a p value  $< 0.05$  in univariate  
34  
35 analysis. Using the aforementioned criteria, the following variables were considered in step-wise  
36  
37 regression analysis: age, sex, height, weight, BMI z-score, WC z-score, WHtR z-score, heart  
38  
39 rate, western acculturation score, child's perception of body image, and grip strength. In addition  
40  
41 to these variables, father's education, daily intake of fast foods and total daily intake were  
42  
43 considered in diastolic BP z-score models. The full lists of variables initially identified from  
44  
45 literature search were considered in hypertension models. Statistical analysis was done using  
46  
47 SPSS version 24.0. P values  $< 0.05$  were considered statistically significant. This study was  
48  
49  
50  
51  
52  
53  
54  
55  
56  
57  
58  
59  
60

1  
2  
3 written in line with the Strengthening the Reporting of Observational studies in Epidemiology  
4 (STROBE) guidelines<sup>25</sup>  
5  
6

## 7 8 **Patient and Public Involvement** 9

10  
11 The research questions and outcome measures in this study were chosen by this team of  
12 researchers and clinicians with extensive experience working with the South Asian population to  
13 better understand the potential health risks faced by South Asian children. No patients were  
14 involved in setting the research question in development of the research question or study design.  
15  
16 There are currently no plans to disseminate the results of this research study to study participants  
17 or to the relevant patient population.  
18  
19  
20  
21  
22  
23  
24  
25

## 26 **RESULTS** 27

28  
29 This study included 360 boys and 402 girls ranging from 5.8 to 17.0 years (mean age 9.5  
30  $\pm$  3.0 years), with no statistically significant difference observed for age by sex. Mean non-  
31 transformed systolic BP was 109  $\pm$  11 mmHg while mean diastolic BP was 65  $\pm$  8 mmHg. The  
32 prevalence of systolic hypertension in this population was 12%. South Asian boys were more  
33 physically active outside school than girls ( $p=0.04$ ); were more likely to have a maternal history  
34 of hypertension ( $p=0.047$ ); higher WC z-score ( $p<0.001$ ); higher WHtR z-score ( $p=0.02$ ); lower  
35 heart rate ( $p=0.047$ ); higher systolic BP z-scores ( $p=0.001$ ); higher non-transformed systolic BP  
36 ( $p<0.001$ ); higher prevalence of systolic hypertension ( $p=0.01$ ); had lower traditional  
37 acculturation score ( $p=0.02$ ); and significantly higher exposure to bullying and violence at school  
38 ( $p=0.025$ ) (Table 1).  
39  
40  
41  
42  
43  
44  
45  
46  
47  
48  
49  
50  
51  
52

## 53 **Correlates of Systolic BP and Systolic Hypertension** 54 55 56 57

1  
2  
3 In univariate linear regression analysis with systolic BP z-scores, weight (kg) ( $\beta= 0.005$ ,  
4 95% CI= 0.001, 0.01,  $p=0.022$ ), BMI z-score ( $\beta= 0.289$ , 95% CI= 0.246, 0.333,  $p<0.001$ ), WC z-  
5  
6 score ( $\beta= 0.266$ , 95% CI= 0.213, 0.319,  $p<0.001$ ), WHtR z-score ( $\beta= 0.271$ , 95% CI= 0.219,  
7  
8 0.324,  $p<0.001$ ), heart rate (beats per minute) ( $\beta= 0.019$ , 95% CI= 0.015, 0.023,  $p<0.001$ ), and  
9  
10 the child's perception of their body image (using Stunkard's silhouettes) ( $\beta= 0.136$ , 95% CI=  
11  
12 0.083, 0.189,  $p<0.001$ ) were found to be positively associated with systolic BP z-score. In  
13  
14 contrast, we found that compared to male sex, female sex had lower systolic BP z-score ( $\beta= -$   
15  
16 0.246, 95% CI= -0.385, -0.108,  $p<0.001$ ). Similarly, age (years) ( $\beta= -0.060$ , 95% CI= -0.084, -  
17  
18 0.037,  $p<0.001$ ), children's western acculturation score ( $\beta= -0.021$ , 95% CI= -0.036, -0.006,  
19  
20  $p=0.007$ ) and height (cm) ( $\beta= -0.006$ , 95% CI= -0.010, -0.002,  $p=0.007$ ) were negatively  
21  
22 associated with systolic BP z-score. After adjustment for covariates the association between age,  
23  
24 sex, weight, BMI z-score, WC z-score, WHtR z-score, heart rate and children's perception of  
25  
26 body image with systolic BP z-scores remained— while the association with height became  
27  
28 positive, and positive associations between children's grip strength and daily physical activity in  
29  
30 school with systolic BP z-score was observed upon adjustment (Table 2).  
31  
32  
33  
34  
35  
36  
37

38  
39 In stepwise regression analysis, the combination of age, sex, BMI z-score, heart rate and  
40  
41 weight were observed to be the most important correlates of systolic BP z-score, accounting for  
42  
43 30% of the systolic BP z-score variance of South Asian children (Table 3).  
44  
45

46  
47 In unadjusted logistic regression analysis, female sex was associated with lower odds of  
48  
49 developing systolic hypertension (odds ratio (OR) = 0.56, 95% CI= 0.36, 0.87,  $p=0.011$ ).  
50  
51 Associations were also observed with weight (kg) and systolic hypertension (OR= 1.02, 95%  
52  
53 CI= 1.01, 1.04,  $p<0.001$ ), BMI z-score and systolic hypertension (OR= 2.22, 95% CI= 1.84,  
54  
55 2.68,  $p<0.001$ ), WC z-score and systolic hypertension (OR= 2.65, 95% CI= 2.06, 3.43,  $p<0.001$ )  
56  
57

1  
2  
3 and WHtR z-score and systolic hypertension (OR= 2.47, 95% CI= 1.95, 3.13,  $p<0.001$ ).  
4  
5 Similarly, associations were observed between heart rate (beats per minute) and systolic  
6  
7 hypertension (OR=1.04, 95% CI= 1.02, 1.06,  $p<0.001$ ), child's perception of body image and  
8  
9 systolic hypertension (OR= 1.50, 95% CI= 1.25, 1.79,  $p<0.001$ ) and western acculturation score  
10  
11 (OR= 0.95, 95% CI=0.90, 1.00,  $p=0.03$ ). Upon adjustment for covariates, the associations  
12  
13 between sex, height, weight, BMI z-score, WC z-score, WHtR z-score, heart rate and child's  
14  
15 perception of body image remained — while the association between grip strength and systolic  
16  
17 hypertension became significant upon adjustment (Figure 1).  
18  
19  
20  
21

### 22 **Correlates of Diastolic BP and Diastolic Hypertension**

23  
24  
25 In univariate linear regression analysis of multifactorial variables with diastolic BP z-  
26  
27 score, negative associations with diastolic BP z-score were observed between age (years) ( $\beta= -$   
28  
29  $0.061$ ,  $p<0.001$ ), height (cm) ( $\beta= -0.009$ ,  $p<0.001$ ), western acculturation score ( $\beta= -0.018$ ,  
30  
31  $p=0.007$ ), fathers' level of education ( $\beta= -0.054$ ,  $p=0.047$ ), total daily food intake ( $\beta= -0.016$ ,  
32  
33  $p=0.005$ ), fast foods ( $\beta= -0.065$ ,  $p=0.048$ ) and grip strength (kg) ( $\beta= -0.019$ ,  $p<0.001$ ).  
34  
35  
36 Conversely, significant positive associations with diastolic BP z-score were observed between  
37  
38 heart rate ( $\beta= 0.018$ ,  $p<0.001$ ), BMI z-score ( $\beta= 0.156$ ,  $p<0.001$ ), WC z-score ( $\beta= 0.120$ ,  
39  
40  $p<0.001$ ), WHtR z-score ( $\beta= 0.128$ ,  $p<0.001$ ), and children's perception of their body image  
41  
42 (using Stunkard's silhouettes) ( $\beta= 0.053$ ,  $p=0.007$ ). After adjustment for covariates the  
43  
44 association remained between age, weight, BMI z-score, WC z-score, WHtR z-score, heart rate  
45  
46 and children's perception of body image with diastolic BP z-score, while the association between  
47  
48 physical activity in school with diastolic BP z-score became significant (Table 2).  
49  
50  
51  
52  
53  
54  
55  
56  
57  
58  
59  
60



1  
2  
3 In stepwise regression analysis, the combination of age, BMI z-score, heart rate and daily  
4 intake of fast foods were observed to be the most important aggregate correlates of diastolic BP  
5 z-score, accounting for 23% of the diastolic BP z-score variance of South Asian children (Table  
6  
7  
8  
9  
10 3).

11  
12  
13 In unadjusted logistic regression analysis, associations were observed between age  
14 (years) (OR= 0.71, 95% CI= 0.55, 0.92, p=0.01), height (OR= 0.97, 95% CI= 0.94, 1.00,  
15 p=0.04), BMI z-score (OR= 1.68, 95% CI= 1.31, 2.17, p<0.001), WC z-score (OR= 1.89, 95%  
16  
17 CI= 1.32, 2.70, p=0.001), WHtR z-score (OR= 1.77, 95% CI= 1.26, 2.47, p=0.001), heart rate  
18  
19 (beats per minute) (OR=1.06, 95% CI= 1.03, 1.10, p<0.001) and grip strength (kg) (OR= 0.92,  
20  
21 95% CI= 0.86, 0.99, p=0.024) with diastolic BP z-score. The association with age, BMI z-score,  
22  
23 WC z-score, WHtR z-score and heart rate remained significant after adjustment for covariates,  
24  
25 while the association with weight became significant (Figure 2).  
26  
27  
28  
29  
30  
31

## 32 **DISCUSSION**

33  
34  
35 This study provides information on the multifactorial correlates of systolic and diastolic  
36  
37 BP z-scores in a population of South Asian children. While results from unadjusted models  
38  
39 highlight the presence of a multifactorial relationship for BP and hypertension, the disappearance  
40  
41 of most of the social and lifestyle risk factors upon adjustment highlights the contribution of  
42  
43 physiological variables such as age, sex, adiposity, height, heart rate, and grip strength to the risk  
44  
45 of elevated BP and hypertension in South Asian children.  
46  
47  
48  
49

50 It is well documented that the burden of hypertension has precipitously increased in the  
51  
52 pediatric population<sup>26</sup>. In addition, some studies have documented higher prevalence of  
53  
54 hypertension in certain ethnic groups such as South Asians<sup>11</sup>. Although our sample was based on  
55  
56  
57

1  
2  
3 convenience and non-representative given that sampling was restricted to two Canadian cities,  
4  
5 the prevalence of hypertension in our study at 12% is consistent with age, sex and height  
6  
7 adjusted estimates from Jafar *et al*<sup>11</sup> using a nationally-representative survey of Pakistani  
8  
9 children age 5 to 14 years, but higher than 5.2% prevalence from one cross-sectional study of  
10  
11 Indian children ages 5 to 12 years<sup>27</sup>. Our estimates also appear higher than estimates from  
12  
13 Canadian children ages 6 to 19 years where 4% of children were said to have hypertension and  
14  
15 prehypertension<sup>28</sup>. When stratified by sex, we found significantly higher rates were observed for  
16  
17 boys at 15% compared to girls at 9%. This is consistent with results from studies in other  
18  
19 children which have reported higher hypertension prevalence in boys<sup>29,30</sup>, and results from  
20  
21 regression analysis which found female sex to be associated with lower odds of hypertension.  
22  
23 This risk differential has been attributed to the presence of an anti-inflammatory immune profile  
24  
25 in females and pro-inflammatory profile in males<sup>31</sup> — underscoring the potential for intervention  
26  
27 efforts aimed at addressing sex-based disparities.  
28  
29  
30  
31  
32  
33

34 Consistent with research conducted in South Asian children<sup>11,32</sup> and research conducted  
35  
36 in other childhood populations of different ethnicities<sup>29,33–37</sup>, we observed positive associations  
37  
38 between measures of adiposity and BP and hypertension after adjusting for covariates. The  
39  
40 consistency of the association underscores the significant contribution of increasing adiposity to  
41  
42 the prevalence of hypertension in young people. Moreover, the positive association between grip  
43  
44 strength with systolic BP z-score and hypertension upon adjustment in this study raises questions  
45  
46 about the benefits of strength training in children. The benefits of physical activity including  
47  
48 aerobic exercise in relation to hypertension remain clear; however, the benefits of strength  
49  
50 training in relation to hypertension risk, relative to the benefits of aerobic exercise, appear  
51  
52 questionable<sup>38</sup>. It is unclear what might be responsible for the positive effect observed between  
53  
54  
55  
56  
57  
58  
59  
60

1  
2  
3 grip strength and systolic BP z-score; however, findings from our study appear consistent with  
4 studies which have explored this association in Chinese<sup>39</sup> and American children<sup>40</sup>.  
5  
6  
7

8  
9 Despite the fact that the BP z-scores values take into consideration age, height and sex  
10 values, we opted to test for residual correlations by examining the independent effect of these  
11 variables on BP z-scores and hypertension values. The significant independent association  
12 observed between age, sex and height with both BP z-scores and hypertension suggest that the  
13 NHANES growth charts which are used in the development of the blood pressure tables might  
14 not be well-suited to the South Asian population. Consequently, given the high rates of  
15 hypertension in this population as documented both in this research study and those in other  
16 studies of South-Asian children, the development of growth charts that reflect the growth  
17 trajectory and the unique physiological changes which have been documented in South Asian  
18 (such as a higher body fat at similar BMI levels when compared to Caucasians) will be necessary  
19 to ensuring that the epidemiology of hypertension in South Asian children is captured.  
20  
21  
22  
23  
24  
25  
26  
27  
28  
29  
30  
31  
32  
33

34  
35 The consistent association between adiposity and hypertension, including the higher  
36 prevalence of hypertension in this population, reinforces their connections through well-  
37 established mechanisms. Specifically, the South Asian phenotype of higher body fat<sup>7</sup>—especially  
38 the visceral type which has been identified in adults<sup>6</sup>—when compared to their Caucasian peers,  
39 could activate the formation of pro-inflammatory cytokines such as Interleukin 6 (IL-6) which  
40 results in physiological changes that could lead to endothelial and vascular dysfunction through  
41 the development of insulin resistance<sup>41</sup>, resulting in an increased predisposition for hypertension.  
42 The positive association between height and BP in this population could be explained by cerebral  
43 perfusion requirements where higher BP is needed in taller people to achieve optimal cerebral  
44 perfusion owing to hydrostatic pressure differences in taller and shorter individuals<sup>42</sup>. However,  
45  
46  
47  
48  
49  
50  
51  
52  
53  
54  
55  
56  
57

1  
2  
3 more research in South Asian children is warranted to corroborate our findings given the  
4  
5 difference observed in direction of association in unadjusted and adjusted models.  
6  
7

8  
9 The positive association we found between the child's perception of body image and BP  
10  
11 may be due to this variable mirroring children's weight status or conversely, a marker for a  
12  
13 graded increase in stress levels, owing to societal criticism of fatter body types, which could  
14  
15 have insidious effects for hypertension risk through its impact on the neuro-endocrine system<sup>43</sup>.  
16  
17 Additionally, a range of social and lifestyle variables were also found to be associated with BP z-  
18  
19 score in univariate analysis but disappeared upon adjustment. While results from univariate  
20  
21 associations may demonstrate links between risk factor and outcome, the disappearance of the  
22  
23 association upon adjustment for socio-demographic variables highlights the links between these  
24  
25 variables and suggests that the pathway linking these factors with BP might be interdependent.  
26  
27  
28  
29

30  
31 The stepwise regression model shows that correlates from this study explained only about  
32  
33 30% of the variance of systolic BP z-score and 23% of the variability of diastolic BP z-scores. It  
34  
35 is possible that some of this unexplained variance might be explained by genetics, as it has been  
36  
37 suggested that about 30% to 60% of the variance in BP may be heritable<sup>44,45</sup>. Yet the lack of  
38  
39 association between parental hypertension and child BP in the subset of parents of participants  
40  
41 who provided this data would appear to contradict these findings for this population of South  
42  
43 Asian children. However, it is likely that the subset of parents of child participants who provided  
44  
45 this information might not be completely representative of the entire cohort, thereby biasing the  
46  
47 results. Still, even accounting for potential genetic contributions, a significant amount of the BP  
48  
49 variance remains unexplained. More research is needed to provide insight regarding the  
50  
51 contributory effects of other potential variables that might contribute to risk of elevated BP in  
52  
53 South Asian children.  
54  
55  
56  
57

1  
2  
3 Notably, null associations were also observed for certain variables in this study that have  
4 been found to be significantly associated with BP and hypertension in other child populations.  
5  
6 For example, parental history of hypertension, dietary factors (such as consumption of fruit and  
7  
8 vegetables) and exposure to second hand smoking have been linked in other studies to child BP  
9  
10 but had no significant impact in this study. This could be reflective of the potential biases  
11  
12 associated with using self-reports or may highlight how interactions between genes and  
13  
14 environment/lifestyle shape risk factor susceptibilities — underscoring the need for more ethnic-  
15  
16 based and ethnic comparison studies when exploring risk associations.  
17  
18  
19  
20  
21

### 22 **Study Limitations**

23  
24  
25 This study has limitations. First, although we sought to recruit a representative sample of  
26  
27 urban South Asian children, it was not a random sample. However, there is likely to be minimal  
28  
29 effect on the relationships between the ranges of risk factors evaluated in this study. Second, this  
30  
31 is a cross-sectional study and is therefore unable to provide insights into causal associations  
32  
33 between the risk factor variables and long term CVD risk in South Asian children. Third,  
34  
35 potential recall biases may have occurred as a result of using self-report data for some of the  
36  
37 variables including diet and physical activity measures. Last, the lack of data collection on sexual  
38  
39 maturity status could potential confound the study results obtained here. However, the  
40  
41 adjustment for age in this study, which acts as a proxy variable for sexual maturity might help  
42  
43 mitigate the bias. These limitations are in part addressed by strengths of this study which lies in  
44  
45 its large sample size of South Asian children and in the wide range of risk factors examined.  
46  
47  
48  
49  
50

### 51 **Implications**

1  
2  
3 Our findings underscore a range of factors that may contribute to risk of elevated BP and  
4 hypertension in South Asian children. Consequently, public health interventions such as those  
5 that emphasize prevention such as population-based health education and lifestyle modification  
6 that considers unique cultural contexts may provide significant potential in addressing the burden  
7 of hypertension in this population. There are also implications for clinical settings. Specifically,  
8 our findings suggest that while South Asian children may benefit from interventions aimed at  
9 reducing obesity to address the comparatively higher burden of hypertension in this population,  
10 there are certain sub-groups who could benefit from more targeted preventive interventions in  
11 primary care settings — such as males, children with increased adiposity, taller children, and  
12 children with increased heart rate, or children with a combination of these factors.  
13  
14  
15  
16  
17  
18  
19  
20  
21  
22  
23  
24  
25

## 26 27 **CONCLUSION**

28  
29  
30 In this group of South Asian children, we found univariate associations between a range  
31 of physiological, social and lifestyle factors with BP z-scores and hypertension. However, in  
32 multivariate analysis, physiological variables remained consistently associated with BP and  
33 hypertension, and provided the strongest explanatory effect for the variance in BP. Given the  
34 sequelae associated with elevated BP, including BP tracking from childhood into adulthood,  
35 these results provide evidence on modifiable risk factors that might be targeted by prevention  
36 strategies in primary care to reduce the burden of high BP and hypertension in South Asian  
37 children.  
38  
39  
40  
41  
42  
43  
44  
45  
46  
47  
48

49 **Author contributions:** Dr. Scott, Dr. Punthakee, Dr. Morrison, Dr. Gupta, Dr. Teo and Sumathy  
50 Rangarajan conceptualized the study, contributed to study design and reviewed the manuscript.  
51 Adeleke Fowokan conceptualized the study, drafted the initial manuscript, carried out statistical  
52 analysis and revised the manuscript. Dr. Waddell and Dr. Rosin contributed to the design of the  
53 study, reviewed and revised the manuscript.  
54  
55  
56  
57

1  
2  
3 All authors approved the final manuscript as submitted and agree to be accountable for all  
4 aspects of the work.  
5

6 **Funding:** This study was funded by the Canadian Institutes of Health Research (FRN: 109206)  
7

8 **Acknowledgements:** Dr. Lear is the Pfizer/Heart and Stroke Foundation Chair in Cardiovascular  
9 Prevention Research at St. Paul's Hospital. Research coordinators Pam Mackie, Michelle  
10 Tsigoulis, Veronica de Jong, Vaven Ghaat, Erica Corber and Amanpreet Thind were  
11 instrumental in completing the data collection for this project.  
12

13 **Competing interests:** None declared  
14

15 **Ethics Approval:** Simon Fraser University Research Ethics Board (REB), Providence Health  
16 Care REB, and the Hamilton Integrated REB  
17

18 **Data sharing statement:** Raw data are held by the lead author of the study in accordance with  
19 ethics guidelines.  
20  
21  
22  
23  
24  
25  
26  
27  
28  
29  
30  
31  
32  
33  
34  
35  
36  
37  
38  
39  
40  
41  
42  
43  
44  
45  
46  
47  
48  
49  
50  
51  
52  
53  
54  
55  
56  
57  
58  
59  
60

## References

1. Population Reference Bureau. 2017 World Population Data Sheet. PRB's 2017 World Population Data Sheet.
2. Statistics Canada. Immigration and Ethnocultural Diversity in Canada. National Household Survey, 2011. National Household Survey, 2011. doi:99-010-X2011001
3. UK Office for National Statistics. Ethnicity and National Identity in England and Wales. [Http://Www.Ons.Gov.Uk](http://www.ons.gov.uk).
4. Hoeffel EM, Rastogi S, Kim MO, Shahid H. The Asian Population: 2010. *2010 Census Briefs*. 2012;(March):1-23.
5. Anand SS, Yusuf S, Vuksan V, et al. Differences in risk factors, atherosclerosis, and cardiovascular disease between ethnic groups in Canada: the Study of Health Assessment and Risk in Ethnic groups (SHARE). *Lancet*. 2000;356(9226):279-284. doi:10.1016/S0140-6736(00)02502-2
6. Lear SA, Humphries KH, Kohli S, Chockalingam A, Frohlich JJ, Birmingham CL. Visceral adipose tissue accumulation differs according to ethnic background: Results of the Multicultural Community Health Assessment Trial (M-CHAT). *Am J Clin Nutr*. 2007;86(2):353-359.
7. J Eyre EL, Duncan MJ, Nevill A. South Asian Children Have Increased Body Fat in Comparison to White Children at the Same Body Mass Index. doi:10.3390/children4110102
8. WHO. *A Global Brief on Hypertension*.; 2013. doi:10.1136/bmj.1.4815.882-a
9. Chen X, Wang Y. Tracking of blood pressure from childhood to adulthood: A systematic review and meta-regression analysis. *Circulation*. 2008;117(25):3171-3180. doi:10.1161/CIRCULATIONAHA.107.730366
10. Soudarssanane M, Mathanraj S, Sumanth M, Sahai A, Karthigeyan M. Tracking of blood pressure among adolescents and young adults in an urban slum of puducherry. *Indian J Community Med*. 2008;33(2):107-112. doi:10.4103/0970-0218.40879
11. Jafar TH, Islam M, Poulter N, et al. Children in South Asia have higher body mass-adjusted blood pressure levels than white children in the United States: a comparative study. *Circulation*. 2005;111(10):1291-1297. doi:10.1161/01.CIR.0000157699.87728.F1
12. Henderson EJ, Jones CHD, Hornby-Turner YC, Pollard TM. Adiposity and blood pressure in 7- to 11-year-old children: Comparison of British Pakistani and white British children, and of British Pakistani children of migrant and British-born mothers. *Am J Hum Biol*. 2011;23(5):710-716. doi:10.1002/ajhb.21204
13. Fowokan AO, Sakakibara BM, Onsel N, et al. Correlates of elevated blood pressure in healthy children: a systematic review. *Clin Obes*. July 2018. doi:10.1111/cob.12271



14. Stunkard AJ. Use of the Danish Adoption Register for the study of obesity and thinness. *Res Publ Assoc Res Nerv Ment Dis*. 1983;60:115-120. <https://ci.nii.ac.jp/naid/10025281459/>. Accessed August 8, 2018.
15. Lo WS, Ho SY, Mak KK, Lam TH. The Use of Stunkard's Figure Rating Scale to Identify Underweight and Overweight in Chinese Adolescents. *PLoS One*. 2012;7(11). doi:10.1371/journal.pone.0050017
16. Birch L., Fisher J., Grimm-Thomas K, Markey C., Sawyer R, Johnson S. Confirmatory factor analysis of the Child Feeding Questionnaire: a measure of parental attitudes, beliefs and practices about child feeding and obesity proneness. *Appetite*. 2001;36(3):201-210. doi:10.1006/APPE.2001.0398
17. Rivara F, Menestrel S Le, Prevention C on the B and PE of PVL for B, et al. *Preventing Bullying Through Science, Policy, and Practice*. National Academies Press (US); 2016. doi:10.17226/23482
18. Stigler M, Dhavan P, Van Dusen D, Arora M, Reddy KS, Perry CL. Westernization and tobacco use among young people in Delhi, India. *Soc Sci Med*. 2010;71(5):891-897. doi:10.1016/j.socscimed.2010.06.002
19. Iqbal R, Anand S, Ounpuu S, et al. Dietary patterns and the risk of acute myocardial infarction in 52 countries: Results of the INTERHEART study. *Circulation*. 2008;118(19):1929-1937. doi:10.1161/CIRCULATIONAHA.107.738716
20. Roberts HC, Denison HJ, Martin HJ, et al. A review of the measurement of grip strength in clinical and epidemiological studies: Towards a standardised approach. *Age Ageing*. 2011;40(4):423-429. doi:10.1093/ageing/afr051
21. de Onis M, Onyango AW, Borghi E, Siyam A, Nishida C, Siekmann J. Development of a WHO growth reference for school-aged children and adolescents. *Bull World Health Organ*. 2007;85(9):660-667. doi:10.2471/blt.07.043497
22. Sharma AK, Metzger DL, Daymont C, Hadjiyannakis S, Rodd CJ. LMS tables for waist-circumference and waist-height ratio Z-scores in children aged 5–19 y in NHANES III: association with cardio-metabolic risks. 2015;78:Pediatric Research. <http://www.nature.com/pr/journal/v78/n6/full/pr2015160a.html>. Accessed July 27, 2017.
23. National High Blood Pressure Education Program Working Group on High Blood. The fourth report on the diagnosis, evaluation, and treatment of high blood pressure in children and adolescents. *Pediatrics*. 2004;114(2 Suppl 4th Report):555-576. doi:10.1542/peds.114.2.S2.555
24. Batra R, Reio TG. Gender Inequality Issues in India. *Adv Dev Hum Resour*. 2016;18(1):88-101. doi:10.1177/1523422316630651
25. von Elm E, Altman DG, Egger M, et al. The Strengthening the Reporting of Observational Studies in Epidemiology (STROBE) statement: guidelines for reporting observational studies. *J Clin Epidemiol*. 2008;61(4):344-349. doi:10.1016/j.jclinepi.2007.11.008

- 1  
2  
3 26. Din-Dzietham R, Liu Y, Bielo MV, Shamsa F. High blood pressure trends in children and  
4 adolescents in national surveys, 1963 to 2002. *Circulation*. 2007;116(13):1488-1496.  
5 doi:10.1161/CIRCULATIONAHA.106.683243  
6
- 7 27. Genovesi S, Antolini L, Gallieni M, et al. High prevalence of hypertension in normal and  
8 underweight Indian children. *J Hypertens*. 2011;29(2):217-221.  
9 doi:10.1097/HJH.0b013e3283407fe3  
10
- 11 28. Statistics Canada. Blood pressure of Canadian children and youth, 2009 to 2011.  
12 <http://www.statcan.gc.ca/pub/82-625-x/2012001/article/11713-eng.htm>. Accessed August  
13 30, 2017.  
14
- 15 29. Huntington-Moskos L, Turner-Henson A, Rice M. Tobacco exposure, weight status, and  
16 elevated blood pressure in adolescents. *J Community Health*. 2014;39(4):653-659.  
17 doi:10.1007/s10900-014-9839-5  
18
- 19 30. Leung LCK, Sung RYT, So H-K, et al. Prevalence and risk factors for hypertension in  
20 Hong Kong Chinese adolescents: waist circumference predicts hypertension, exercise  
21 decreases risk. *Arch Dis Child*. 2011;96(9):804-809. doi:10.1136/adc.2010.202770  
22
- 23 31. Gillis EE, Sullivan JC. Sex Differences in Hypertension: Recent Advances. *Hypertension*.  
24 2016;68(6):1322-1327. doi:10.1161/HYPERTENSIONAHA.116.06602  
25
- 26 32. Goel M, Pal P, Agrawal A, Ashok C. Relationship of body mass index and other life style  
27 factors with hypertension in adolescents. *Ann Pediatr Cardiol*. 2016;9(1):29.  
28 doi:10.4103/0974-2069.171393  
29
- 30 33. Moser DC, Giuliano I de CB, Titski ACK, Gaya AR, Coelho-e-Silva MJ, Leite N.  
31 Anthropometric measures and blood pressure in school children. *J Pediatr (Rio J)*.  
32 2013;89(3):243-249. doi:10.1016/j.jped.2012.11.006  
33
- 34 34. Flores-Huerta S, Klünder-Klünder M, Reyes de la Cruz L, Santos JI. Increase in Body  
35 Mass Index and Waist Circumference Is Associated with High Blood Pressure in Children  
36 and Adolescents in Mexico City. *Arch Med Res*. 2009;40(3):208-215.  
37 doi:10.1016/j.arcmed.2009.02.009  
38
- 39 35. Wang H, Necheles J, Carnethon M, et al. Adiposity measures and blood pressure in  
40 Chinese children and adolescents. *Arch Dis Child*. 2008;93(9):738-744.  
41 doi:10.1136/adc.2007.127589  
42
- 43 36. Mirzaei M, Taylor R, Morrell S, Leeder SR. Predictors of blood pressure in a cohort of  
44 school-aged children. *Eur J Cardiovasc Prev Rehabil*. 2007;14(5):624-629.  
45 doi:10.1097/HJR.0b013e32828621c6  
46
- 47 37. Lurbe E, Torro I, Rodríguez C, Alvarez V, Redón J. Birth weight influences blood  
48 pressure values and variability in children and adolescents. *Hypertens (Dallas, Tex 1979)*.  
49 2001;38(3):389-393. <http://www.ncbi.nlm.nih.gov/pubmed/11566910>. Accessed January  
50 17, 2017.  
51
- 52 38. Pescatello LS, MacDonald H V., Lamberti L, Johnson BT. Exercise for Hypertension: A  
53  
54  
55

- 1  
2  
3 Prescription Update Integrating Existing Recommendations with Emerging Research.  
4 *Curr Hypertens Rep.* 2015;17(11). doi:10.1007/s11906-015-0600-y  
5
- 6 39. Dong B, Wang Z, Arnold L, Song Y, Wang HJ, Ma J. The association between blood  
7 pressure and grip strength in adolescents: Does body mass index matter. *Hypertens Res.*  
8 2016;39(12):919-925. doi:10.1038/hr.2016.84  
9
- 10 40. Zhang R, Li C, Liu T, Zheng L, Li S. Handgrip Strength and Blood Pressure in Children  
11 and Adolescents: Evidence from. 2011;31(July):792-796.  
12 doi:10.1093/ajh/hpy032/4883259  
13
- 14 41. Van kova I, Maletinska L, Behuliak M, Nagelova V, Zicha J, Kune J. Obesity-related  
15 hypertension: possible pathophysiological mechanisms. *J Endocrinol.* 2014;223(3):R63-  
16 R78. doi:10.1530/JOE-14-0368  
17
- 18 42. Roth J V. Taller People Should Have as Their Normal a Higher Body Mass Index.  
19 *Anesthesiology.* 2018;128(2):424. doi:10.1097/ALN.0000000000001998  
20
- 21 43. Spruill T. Chronic Psychological Stress and Hypertension. *Curr Hypertens Rep.*  
22 2013;12(1):10-16. doi:10.1007/s11906-009-0084-8.Chronic  
23
- 24 44. Vehaskari VM. Heritable forms of hypertension. *Pediatr Nephrol.* 2009;24(10):1929-  
25 1937. doi:10.1007/s00467-007-0537-8  
26
- 27 45. Ehret GB. Genome-wide association studies: contribution of genomics to understanding  
28 blood pressure and essential hypertension. *Curr Hypertens Rep.* 2010;12(1):17-25.  
29 doi:10.1007/s11906-009-0086-6  
30  
31  
32  
33  
34  
35  
36  
37  
38  
39  
40  
41  
42  
43  
44  
45  
46  
47  
48  
49  
50  
51  
52  
53  
54  
55  
56  
57  
58  
59  
60

Table 1: Sociodemographic, anthropometric, risk factor characteristics of South Asian children stratified by sex.

|                                                                    | Total (n=762) | Boy (n=360) | Girl (n=402) | p value |
|--------------------------------------------------------------------|---------------|-------------|--------------|---------|
| Age (years)                                                        | 9.5 ± 3.0     | 9.3 ± 2.8   | 9.7 ± 3.1    | 0.09    |
| Paternal education                                                 |               |             |              | 0.92    |
| No formal education                                                | 5 (1%)        | 3 (1%)      | 2 (1%)       |         |
| Primary education                                                  | 247 (34%)     | 115 (34%)   | 132 (35%)    |         |
| Trade school                                                       | 21 (3%)       | 9 (3%)      | 12 (3%)      |         |
| College/university                                                 | 444 (62%)     | 209 (62%)   | 235 (62%)    |         |
| Maternal education                                                 |               |             |              | 0.363   |
| No formal education                                                | 5 (1%)        | 4 (1%)      | 1 (0%)       |         |
| Primary education                                                  | 223 (30%)     | 103 (30%)   | 120 (31%)    |         |
| Trade school                                                       | 6 (1%)        | 4 (1%)      | 2 (1%)       |         |
| College/university                                                 | 503 (68%)     | 235 (68%)   | 268 (69%)    |         |
| Acculturation score (western)                                      | 34.8 ± 4.7    | 34.6 ± 4.62 | 34.9 ± 4.74  | 0.426   |
| Acculturation score (traditional)                                  | 26.7 ± 4.43   | 26.3 ± 4.35 | 27.1 ± 4.48  | 0.02    |
| Daily physical activity in school (METmins/day)                    | 35.7 ± 25.8   | 36.8 ± 27.0 | 34.8 ± 24.7  | 0.288   |
| Daily physical activity outside school (METmins/day)               | 15.9 ± 33.9   | 18.5 ± 31.3 | 13.5 ± 35.9  | 0.04    |
| Daily intake- servings of fruit and vegetables (daily mean intake) | 3.16 ± 1.86   | 3.11 ± 1.81 | 3.21 ± 1.91  | 0.485   |
| Daily intake- servings of fast foods (daily mean intake)           | 0.91 ± 0.78   | 0.86 ± 0.59 | 0.97 ± 0.91  | 0.067   |
| Total daily intake- servings                                       | 12.0 ± 4.48   | 12.2 ± 4.9  | 11.8 ± 4.1   | 0.243   |
| Exposure to bullying/violence at school                            |               |             |              | 0.025   |
| Yes                                                                | 233 (34%)     | 126 (38%)   | 107 (30%)    |         |

|                                  |                     |              |              |              |        |
|----------------------------------|---------------------|--------------|--------------|--------------|--------|
|                                  | No                  | 459 (66%)    | 207 (62%)    | 252 (70%)    |        |
| Exposure to second hand smoking* |                     |              |              |              | 0.616  |
|                                  | None                | 712 (94%)    | 336 (94%)    | 376 (94%)    |        |
|                                  | 1-2 times/week      | 33 (4%)      | 16 (5%)      | 17 (4%)      |        |
|                                  | 3-6 times/week      | 5 (1%)       | 2 (1%)       | 3 (1%)       |        |
|                                  | At least once a day | 7 (1%)       | 5 (1%)       | 2 (1%)       |        |
|                                  | 2-3 times/day       | 1 (0%)       | 0 (0%)       | 1 (0%)       |        |
| Mother's history of hypertension |                     |              |              |              | 0.047  |
|                                  | Yes                 | 12 (4%)      | 9 (7%)       | 3 (2%)       |        |
|                                  | No                  | 280 (96%)    | 128 (93%)    | 152 (98%)    |        |
| Father's history of hypertension |                     |              |              |              | 0.979  |
|                                  | Yes                 | 30 (10%)     | 14 (10%)     | 16 (10%)     |        |
|                                  | No                  | 260 (90%)    | 122 (90%)    | 138 (90%)    |        |
| Height (cm)                      |                     | 138.3 ± 16.5 | 139.1 ± 17.6 | 137.7 ± 15.5 | 0.22   |
| Weight (kg)                      |                     | 36.5 ± 15.8  | 36.9 ± 16.5  | 36.1 ± 15.3  | 0.46   |
| BMI Z score                      |                     | 0.48 ± 1.44  | 0.57 ± 1.61  | 0.40 ± 1.28  | 0.11   |
| WC Z score                       |                     | -0.06 ± 1.23 | 0.11 ± 0.36  | -0.21 ± 1.24 | <0.001 |
| WHtR Z score                     |                     | -0.38 ± 1.24 | -0.27 ± 1.27 | -0.48 ± 1.21 | 0.02   |
| Heart rate                       |                     | 87 ± 12      | 86 ± 12      | 87 ± 13      | 0.047  |
| SBP Z score                      |                     | 0.57 ± 0.97  | 0.70 ± 0.99  | 0.46 ± 0.95  | 0.001  |
| DBP Z score                      |                     | 0.37 ± 0.71  | 0.35 ± 0.68  | 0.39 ± 0.73  | 0.41   |
| SBP (non-transformed)            |                     | 109 ± 11     | 111 ± 12     | 107 ± 10     | <0.001 |

|                        |          |          |         |       |
|------------------------|----------|----------|---------|-------|
| DBP (non-transformed)  | 65 ± 8   | 65 ± 8   | 65 ± 8  | 0.849 |
| Systolic hypertension  | 90 (12%) | 54 (15%) | 36 (9%) | 0.01  |
| Diastolic hypertension | 31 (4%)  | 13 (4%)  | 18 (5%) | 0.55  |

*\*Exposure defined as a minimum of five consecutive minutes during which inhalation of other people's smoke occurs*

*BP=Blood pressure, BMI=body mass index, WC= waist circumference, WHtR= waist to height ratio, SBP= systolic blood pressure, DBP= diastolic blood pressure*

For peer review only

Table 2: Adjusted linear regression between multifactorial risk factors with systolic and diastolic BP z scores

|                                         | Systolic BP z score              | Diastolic BP z score             |
|-----------------------------------------|----------------------------------|----------------------------------|
| Age <sup>a</sup>                        | -0.054 (-0.078, -0.029), p<0.001 | -0.057 (-0.075, -0.039), p<0.001 |
| Female sex (vs Male) <sup>b</sup>       | -0.208 (-0.350, -0.067), p=0.004 | 0.078 (-0.023, 0.179), p=0.132   |
| Height                                  | 0.022 (0.011, 0.033), p<0.001    | 0.007 (-0.001, 0.015), p=0.077   |
| Weight                                  | 0.047 (0.040, 0.055), p<0.001    | 0.022 (0.016, 0.027), p<0.001    |
| BMI z score                             | 0.292 (0.249, 0.336), p<0.001    | 0.160 (0.127, 0.193), p<0.001    |
| WC z score                              | 0.273 (0.219, 0.326), p<0.001    | 0.137 (0.098, 0.177), p<0.001    |
| WHtR z score                            | 0.289 (0.236, 0.342), p<0.001    | 0.153 (0.114, 0.192), p<0.001    |
| Heart rate                              | 0.016 (0.010, 0.022), p<0.001    | 0.015 (0.011, 0.019), p<0.001    |
| Acculturation (western score)           | -0.010 (-0.026, 0.006), p=0.211  | -0.005 (-0.016, 0.006), p=0.373  |
| Acculturation (traditional score)       | 0.010 (-0.006, 0.026), p=0.227   | 0.003 (-0.008, 0.015), p=0.582   |
| Child's perception of body image        | 0.183 (0.128, 0.239), p<0.001    | 0.104 (0.064, 0.144), p<0.001    |
| Exposure to bullying/violence at school | 0.021 (-0.138, 0.181), p=0.794   | -0.071 (-0.183, 0.042), p=0.218  |
| Father's smoking status                 | 0.118 (-0.056, 0.292), p=0.184   | 0.082 (-0.053, 0.218), p=0.233   |
| Exposure to second hand smoke           | -0.052 (-0.240, 0.136), p=0.587  | 0.018 (-0.117, 0.152), p=0.795   |
| Father's history of                     | -0.127 (-0.484, 0.230), p=0.484  | -0.063 (-0.336, 0.209), p=0.648  |

|                                                        |                                 |                                 |
|--------------------------------------------------------|---------------------------------|---------------------------------|
| hypertension                                           |                                 |                                 |
| Mother's history of hypertension                       | -0.003 (-0.524, 0.518), p=0.991 | 0.354 (-0.042, 0.750), p=0.079  |
| Grip strength (non-dominant hand)                      | 0.025 (0.007, 0.043), p=0.007   | 0.006 (-0.007, 0.019), p=0.381  |
| Daily physical activity in school (METmins/day)        | 0.005 (0.002, 0.008), p=0.003   | 0.003 (0.001, 0.005), p=0.009   |
| Daily physical activity outside school (METmins/day)   | 0.001 (-0.001, 0.003), p=0.363  | 0.000 (-0.002, 0.002), p=0.994  |
| Daily intake- fruit and vegetables (daily mean intake) | -0.008 (-0.049, 0.033), p=0.717 | -0.011 (-0.040, 0.018), p=0.466 |
| Daily intake-fast foods (daily mean intake)            | 0.004 (-0.086, 0.093), p=0.937  | -0.053 (-0.117, 0.011), p=0.104 |

*Model adjusted for age, sex and father's education*

*Values presented are  $\beta$  (95% confidence intervals), and p values*

*BMI= body mass index, WC= waist circumference, WHtR= waist to height ratio, BP =blood pressure, MET=Metabolic equivalent of task*

*<sup>a</sup>Age was adjusted for sex and father's education*

*<sup>b</sup>Sex was for adjusted for age and father's education*



Table 3: Stepwise linear regression analysis showing the aggregate correlates of BP z-score in South Asian children

| Stepwise multiple linear regression models |                        |        |                |         |                         |
|--------------------------------------------|------------------------|--------|----------------|---------|-------------------------|
|                                            | Variable               | B      | 95%            | P value | Adjusted R <sup>2</sup> |
| Systolic BP z-score                        | Child's age            | -0.132 | -0.202, -0.062 | <0.001  | 0.294                   |
|                                            | Sex                    | -0.293 | -0.461, -0.126 | 0.001   |                         |
|                                            | BMI z-score            | 0.125  | 0.022, 0.228   | 0.017   |                         |
|                                            | Heart rate             | 0.014  | 0.007, 0.021   | <0.001  |                         |
|                                            | Weight                 | 0.027  | 0.012, 0.041   | <0.001  |                         |
| Diastolic BP z-score                       | Child's age            | -0.027 | -0.048, -0.007 | 0.01    | 0.228                   |
|                                            | BMI z-score            | 0.125  | 0.081, 0.170   | <0.001  |                         |
|                                            | Heart rate             | 0.015  | 0.010, 0.021   | <0.001  |                         |
|                                            | Daily fast food intake | -0.013 | -0.028, 0.001  | 0.072   |                         |

*BMI=body mass index, BP= blood pressure*

1  
2  
3 Figure 1: Adjusted odds ratio for the association between the multifactorial variables with  
4 systolic hypertension  
5  
6  
7  
8  
9  
10  
11  
12  
13  
14  
15  
16  
17  
18  
19  
20  
21  
22  
23  
24  
25  
26  
27  
28  
29  
30

31 *Model adjusted for age, sex and father's education*

32 *Values presented are odds ratio (95% confidence intervals)*

33 *BMI= body mass index, WC= waist circumference, WHtR= waist to height ratio, BP =blood*  
34 *pressure*

35  
36 *\*compared to males*  
37  
38  
39  
40  
41  
42  
43  
44  
45  
46  
47  
48  
49  
50  
51  
52  
53  
54  
55  
56  
57  
58  
59  
60

1  
2  
3 Figure 2: Adjusted odds ratio for the association between the multifactorial variables with  
4 diastolic hypertension  
5  
6  
7  
8  
9  
10  
11  
12  
13  
14  
15  
16  
17  
18  
19  
20  
21  
22  
23  
24  
25  
26  
27  
28  
29  
30

31 *Model adjusted for age, sex and father's education*

32 *Values presented are odds ratio (95% confidence intervals)*

33 *BMI= body mass index, WC= waist circumference, WHtR= waist to height ratio, BP =blood*  
34 *pressure*  
35  
36  
37  
38  
39  
40  
41  
42  
43  
44  
45  
46  
47  
48  
49  
50  
51  
52  
53  
54  
55  
56  
57  
58  
59  
60

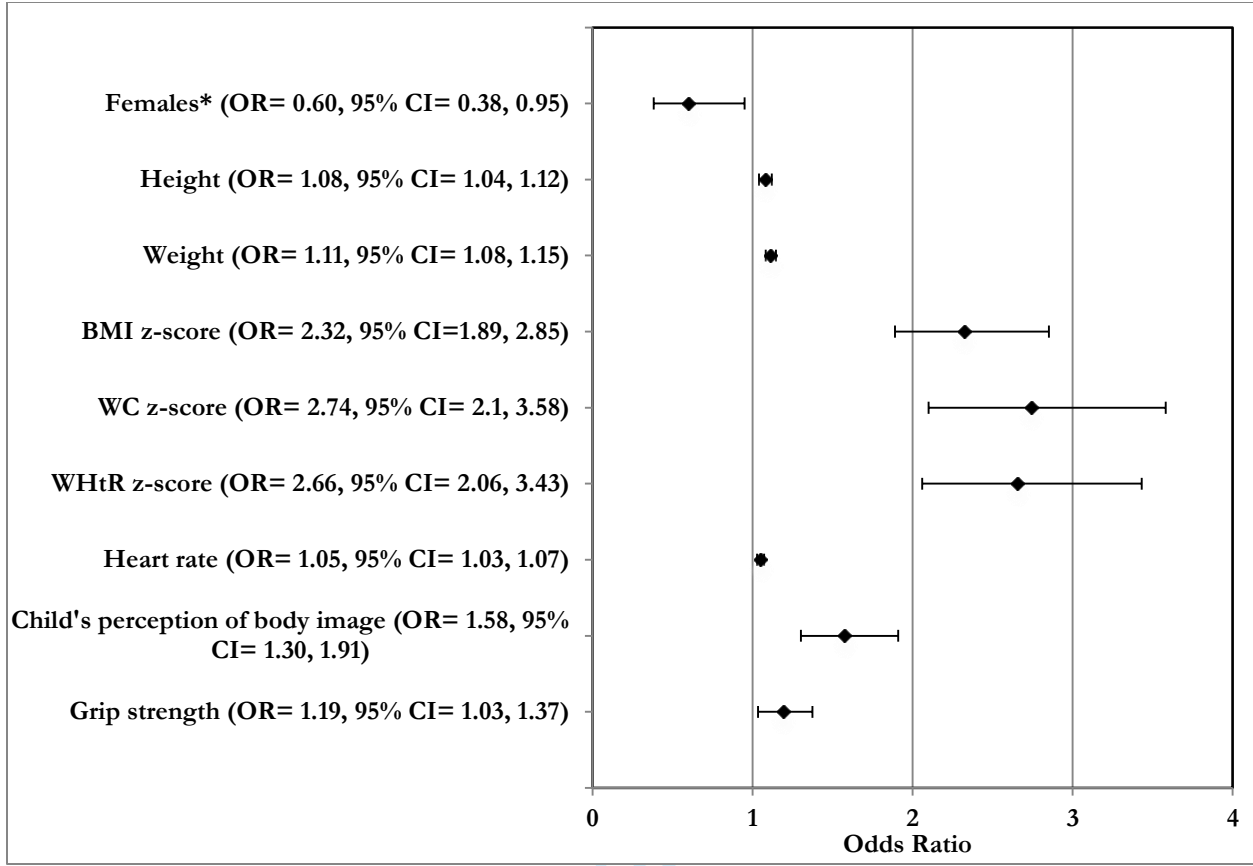

Model adjusted for age, sex and father's education

Values presented are odds ratio (95% confidence intervals)

BMI= body mass index, WC= waist circumference, WHtR= waist to height ratio, BP =blood pressure

\*compared to males

1  
2  
3  
4  
5  
6  
7  
8  
9  
10  
11  
12  
13  
14  
15  
16  
17  
18  
19  
20  
21  
22  
23  
24  
25  
26  
27  
28  
29  
30  
31  
32  
33  
34  
35  
36  
37  
38  
39  
40  
41  
42  
43  
44  
45  
46  
47  
48  
49  
50  
51  
52  
53  
54  
55  
56  
57  
58  
59  
60

For peer review only

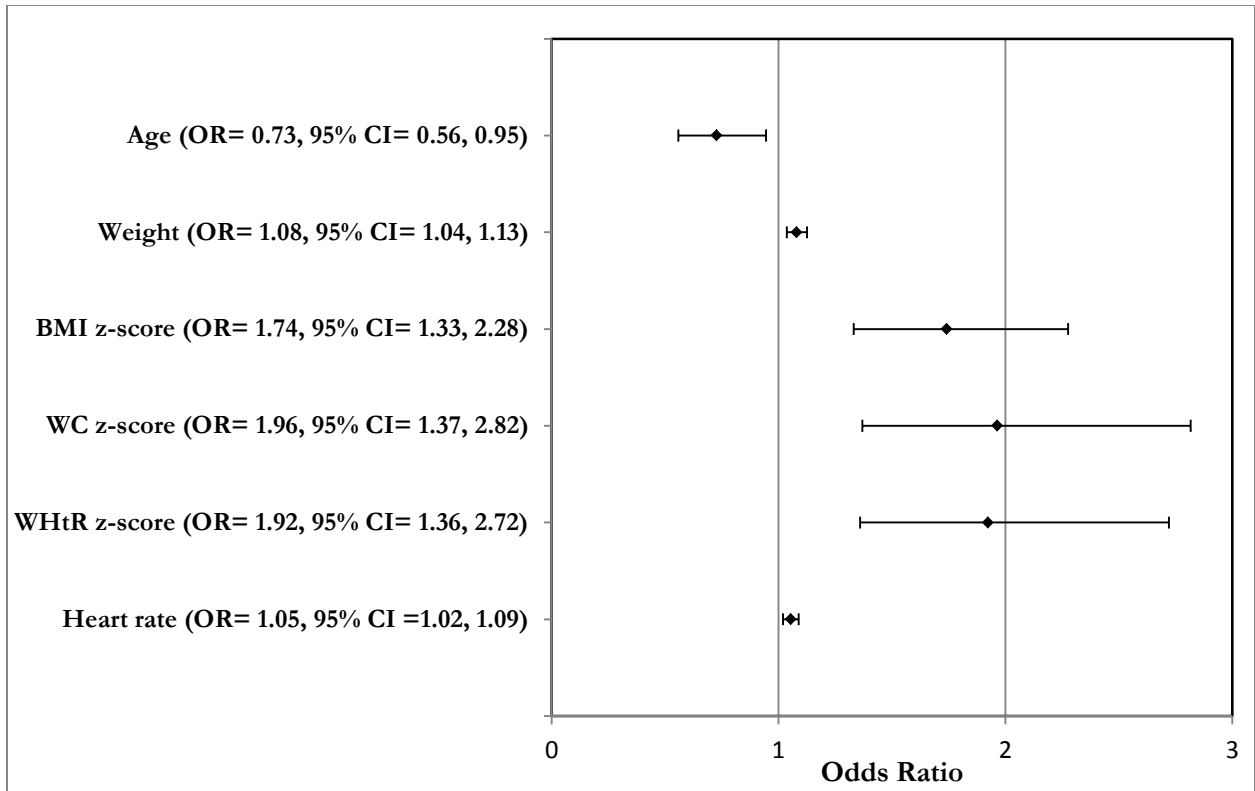

*Model adjusted for age, sex and father's education*

*Values presented are odds ratio (95% confidence intervals)*

*BMI= body mass index, WC= waist circumference, WHtR= waist to height ratio, BP =blood pressure*

STROBE Statement—Checklist of items that should be included in reports of *cross-sectional studies*

|                              | Item No                                                                            | Recommendation                                                                                                                                                                                               | Page No |
|------------------------------|------------------------------------------------------------------------------------|--------------------------------------------------------------------------------------------------------------------------------------------------------------------------------------------------------------|---------|
| <b>Title and abstract</b>    | 1                                                                                  | (a) Indicate the study's design with a commonly used term in the title or the abstract                                                                                                                       | 1-2     |
|                              |                                                                                    | (b) Provide in the abstract an informative and balanced summary of what was done and what was found                                                                                                          | 2       |
| <b>Introduction</b>          |                                                                                    |                                                                                                                                                                                                              |         |
| Background/rationale         | 2                                                                                  | Explain the scientific background and rationale for the investigation being reported                                                                                                                         | 3       |
| Objectives                   | 3                                                                                  | State specific objectives, including any prespecified hypotheses                                                                                                                                             | 3-4     |
| <b>Methods</b>               |                                                                                    |                                                                                                                                                                                                              |         |
| Study design                 | 4                                                                                  | Present key elements of study design early in the paper                                                                                                                                                      | 4       |
| Setting                      | 5                                                                                  | Describe the setting, locations, and relevant dates, including periods of recruitment, exposure, follow-up, and data collection                                                                              | 4       |
| Participants                 | 6                                                                                  | (a) Give the eligibility criteria, and the sources and methods of selection of participants                                                                                                                  | 4       |
| Variables                    | 7                                                                                  | Clearly define all outcomes, exposures, predictors, potential confounders, and effect modifiers. Give diagnostic criteria, if applicable                                                                     | 5-8     |
| Data sources/<br>measurement | 8*                                                                                 | For each variable of interest, give sources of data and details of methods of assessment (measurement). Describe comparability of assessment methods if there is more than one group                         | 5-8     |
| Bias                         | 9                                                                                  | Describe any efforts to address potential sources of bias                                                                                                                                                    | 5       |
| Study size                   | 10                                                                                 | Explain how the study size was arrived at                                                                                                                                                                    |         |
| Quantitative variables       | 11                                                                                 | Explain how quantitative variables were handled in the analyses. If applicable, describe which groupings were chosen and why                                                                                 | 8       |
| Statistical methods          | 12                                                                                 | (a) Describe all statistical methods, including those used to control for confounding                                                                                                                        | 8-9     |
|                              |                                                                                    | (b) Describe any methods used to examine subgroups and interactions                                                                                                                                          | N/A     |
|                              | (c) Explain how missing data were addressed                                        | 7                                                                                                                                                                                                            |         |
|                              | (d) If applicable, describe analytical methods taking account of sampling strategy | N/A                                                                                                                                                                                                          |         |
|                              | (e) Describe any sensitivity analyses                                              | N/A                                                                                                                                                                                                          |         |
| <b>Results</b>               |                                                                                    |                                                                                                                                                                                                              |         |
| Participants                 | 13*                                                                                | (a) Report numbers of individuals at each stage of study—eg numbers potentially eligible, examined for eligibility, confirmed eligible, included in the study, completing follow-up, and analysed            | 9       |
|                              |                                                                                    | (b) Give reasons for non-participation at each stage                                                                                                                                                         | N/A     |
|                              |                                                                                    | (c) Consider use of a flow diagram                                                                                                                                                                           | N/A     |
| Descriptive data             | 14*                                                                                | (a) Give characteristics of study participants (eg demographic, clinical, social) and information on exposures and potential confounders                                                                     | 9       |
|                              |                                                                                    | (b) Indicate number of participants with missing data for each variable of interest                                                                                                                          | 24      |
| Outcome data                 | 15*                                                                                | Report numbers of outcome events or summary measures                                                                                                                                                         | 9       |
| Main results                 | 16                                                                                 | (a) Give unadjusted estimates and, if applicable, confounder-adjusted estimates and their precision (eg, 95% confidence interval). Make clear which confounders were adjusted for and why they were included | 8-11    |

|                          |    |                                                                                                                                                                            |     |
|--------------------------|----|----------------------------------------------------------------------------------------------------------------------------------------------------------------------------|-----|
|                          |    | (b) Report category boundaries when continuous variables were categorized                                                                                                  | N/A |
|                          |    | (c) If relevant, consider translating estimates of relative risk into absolute risk for a meaningful time period                                                           | N/A |
| Other analyses           | 17 | Report other analyses done—eg analyses of subgroups and interactions, and sensitivity analyses                                                                             | N/A |
| <b>Discussion</b>        |    |                                                                                                                                                                            |     |
| Key results              | 18 | Summarise key results with reference to study objectives                                                                                                                   | 12  |
| Limitations              | 19 | Discuss limitations of the study, taking into account sources of potential bias or imprecision. Discuss both direction and magnitude of any potential bias                 | 16  |
| Interpretation           | 20 | Give a cautious overall interpretation of results considering objectives, limitations, multiplicity of analyses, results from similar studies, and other relevant evidence | 17  |
| Generalisability         | 21 | Discuss the generalisability (external validity) of the study results                                                                                                      | 16  |
| <b>Other information</b> |    |                                                                                                                                                                            |     |
| Funding                  | 22 | Give the source of funding and the role of the funders for the present study and, if applicable, for the original study on which the present article is based              | 18  |

\*Give information separately for exposed and unexposed groups.

**Note:** An Explanation and Elaboration article discusses each checklist item and gives methodological background and published examples of transparent reporting. The STROBE checklist is best used in conjunction with this article (freely available on the Web sites of PLoS Medicine at <http://www.plosmedicine.org/>, Annals of Internal Medicine at <http://www.annals.org/>, and Epidemiology at <http://www.epidem.com/>). Information on the STROBE Initiative is available at [www.strobe-statement.org](http://www.strobe-statement.org).



# BMJ Open

## Multifactorial correlates of blood pressure in South Asian children in Canada: a cross-sectional study

|                                 |                                                                                                                                                                                                                                                                                                                                                                                                                                                                                                                                                                                                                                                                                                                                              |
|---------------------------------|----------------------------------------------------------------------------------------------------------------------------------------------------------------------------------------------------------------------------------------------------------------------------------------------------------------------------------------------------------------------------------------------------------------------------------------------------------------------------------------------------------------------------------------------------------------------------------------------------------------------------------------------------------------------------------------------------------------------------------------------|
| Journal:                        | <i>BMJ Open</i>                                                                                                                                                                                                                                                                                                                                                                                                                                                                                                                                                                                                                                                                                                                              |
| Manuscript ID                   | bmjopen-2018-027844.R1                                                                                                                                                                                                                                                                                                                                                                                                                                                                                                                                                                                                                                                                                                                       |
| Article Type:                   | Research                                                                                                                                                                                                                                                                                                                                                                                                                                                                                                                                                                                                                                                                                                                                     |
| Date Submitted by the Author:   | 14-Jan-2019                                                                                                                                                                                                                                                                                                                                                                                                                                                                                                                                                                                                                                                                                                                                  |
| Complete List of Authors:       | Fowokan, Adeleke; Simon Fraser University, Department of Biomedical Physiology and Kinesiology<br>Punthakee, Zubin; McMaster University, Medicine<br>Waddell, Charlotte; Simon Fraser University, Faculty of Health Sciences<br>Rosin, Miriam; Simon Fraser University, Department of Biomedical Physiology and Kinesiology<br>Morrison, Katherine; McMaster University Department of Medicine<br>Gupta, Milan; McMaster University Department of Medicine<br>Rangarajan, Sumathy; Population Health Research Institute, Hamilton Health Sciences/McMaster University,<br>Teo, Koon; Population Health Research Institute, Hamilton Health Sciences/McMaster University,<br>Lear, Scott; Simon Fraser University, Faculty of Health Sciences |
| <b>Primary Subject Heading</b>: | Epidemiology                                                                                                                                                                                                                                                                                                                                                                                                                                                                                                                                                                                                                                                                                                                                 |
| Secondary Subject Heading:      | Paediatrics, Public health                                                                                                                                                                                                                                                                                                                                                                                                                                                                                                                                                                                                                                                                                                                   |
| Keywords:                       | Hypertension < CARDIOLOGY, PAEDIATRICS, EPIDEMIOLOGY                                                                                                                                                                                                                                                                                                                                                                                                                                                                                                                                                                                                                                                                                         |
|                                 |                                                                                                                                                                                                                                                                                                                                                                                                                                                                                                                                                                                                                                                                                                                                              |

SCHOLARONE™  
Manuscripts

1  
2  
3 **1 Multifactorial correlates of blood pressure in South Asian children in Canada: a cross-**  
4 **2 sectional study.**

6  
7 3 Fowokan AO, MPH<sup>1</sup>, Punthakee Z, MD<sup>2</sup>, Waddell C, MD<sup>5</sup>, Rosin M, PhD<sup>1</sup>, Morrison K, MD<sup>2</sup>,  
8 4 Gupta M, MD<sup>2,3</sup>, Rangarajan S, MSc<sup>4</sup>, Teo K, MD<sup>2</sup>, Lear SA, PhD<sup>1, 5, 6</sup>

9  
10 5 <sup>1</sup>Department of Biomedical Physiology and Kinesiology, Simon Fraser University, Burnaby, BC,  
11 6 Canada, V5A 1S6

12  
13 7 <sup>2</sup>Department of Medicine, McMaster University and Population Health Research Institute,  
14 8 Hamilton, Ontario, Canada, L8S 4K1

15  
16 9 <sup>3</sup>Canadian Collaborative Research Network, Brampton, ON, Canada, L6Z 4N5

17  
18 10 <sup>4</sup>Population Health Research Institute, Hamilton, ON, Canada, L8L 2X2

19  
20 11 <sup>5</sup>Faculty of Health Sciences, Simon Fraser University, Burnaby, BC, Canada, V5A 1S6

21  
22 12 <sup>6</sup>Division of Cardiology, Providence Health Care, Vancouver, BC, Canada, V6Z 1Y6

23  
24 13 **Running title: Correlates of blood pressure in South Asian children**

25  
26 14

27  
28 15 **Keywords:** South Asian, children, hypertension, risk factors

29  
30 16

31  
32 17 **Corresponding Author:** Adeleke Fowokan, MPH

33  
34 18 Healthy Heart Program, St. Paul's Hospital

35  
36 19 180-1081 Burrard St.

37  
38 20 Vancouver, BC

39  
40 21 Canada

41  
42 22 V6Z 1Y6

43  
44 23 E-mail: [afowokan@sfu.ca](mailto:afowokan@sfu.ca)

45  
46 24 Word count: 4402 words

## 1 **ABSTRACT**

2 **Objective:** In South Asian children, studies have documented higher blood pressure (BP) values  
3 and hypertension rates than in Caucasian children. To effectively address the burden of  
4 hypertension in this population, an understanding of associated factors is necessary. We sought  
5 to explore various correlates of BP and hypertension, and to identify the most important  
6 aggregate combination of correlates for BP in South Asian children.

7 **Design:** Cross-sectional study

8 **Setting:** Community-based recruitment in two Canadian cities (Hamilton and Surrey)

9 **Participants:** South Asian children (n=762) provided a range of physiological, behavioural and  
10 social variables. BP was assessed using an automated device. Body mass index (BMI), waist  
11 circumference (WC), waist-to-height ratio (WHtR) and BP were transformed to z-scores using  
12 published standards.

13 **Outcome measures:** Linear and logistic regression analyses were used to explore associations  
14 among the range of physiological, behavioural and social factors with BP z-scores and  
15 hypertension while stepwise regression was used to identify aggregate factors that provided  
16 explanatory capacity for systolic BP (SBP) and diastolic BP (DBP) z-scores.

17 **Results:** A range of variables were associated with BP z-score and hypertension in unadjusted  
18 analysis. Upon adjustment for confounders, the association between age, weight, BMI z-score,  
19 WC z-score, WHtR z-score, heart rate and child's perception of body image with SBP and DBP  
20 z-score (p<0.001 for all); sex with SBP z-score (p=0.004); height with SBP z-score (p<0.001);  
21 and grip strength with SBP z-score (p=0.007) remained. In stepwise regression, age, sex, BMI z-

1  
2  
3 1 score, heart rate and weight accounted for 30% of the variance of SBP z-score, while age, BMI  
4  
5 2 z-score, heart rate and daily fast food intake accounted for 23% of the DBP z-score variance.  
6  
7

8 3 **Conclusion:** Our findings suggest that variables such as age, sex, height, adiposity, and heart rate  
9  
10 4 provide stronger explanatory capacity to BP variance and hypertension risk than other variables  
11  
12  
13 5 in South Asian children.  
14  
15  
16  
17  
18  
19  
20  
21  
22  
23  
24  
25  
26  
27  
28  
29  
30  
31  
32  
33  
34  
35  
36  
37  
38  
39  
40  
41  
42  
43  
44  
45  
46  
47  
48  
49  
50  
51  
52  
53  
54  
55  
56  
57  
58  
59  
60

For peer review only

1  
2  
3 **1 ARTICLE SUMMARY**  
4  
5

6 **2 Strengths and limitations of this study**  
7

- 8
- 9 • The strengths of this study includes its large sample size of South Asian children and,
  - 10
  - 11 • Its examination of a wide range of physiological, behavioural and social risk factors in  
12 relation to BP z-scores and hypertension in South Asian children.
  - 13
  - 14
  - 15 • Limitations of the study includes its cross-sectional design which limits the attribution of  
16 causality.  
17  
18  
19  
20  
21  
22  
23  
24  
25  
26  
27  
28  
29  
30  
31  
32  
33  
34  
35  
36  
37  
38  
39  
40  
41  
42  
43  
44  
45  
46  
47  
48  
49  
50  
51  
52  
53  
54  
55  
56  
57  
58  
59  
60

## 1 INTRODUCTION

2 South Asians comprise approximately 25% of the world's global population<sup>1</sup> and  
3 represent a significant portion of the visible ethnic minority groups in countries such as Canada,  
4 the United Kingdom and the United States (US)<sup>2-4</sup>. Individuals of South Asian origin are known  
5 to be at increased risk of cardiovascular disease (CVD) relative to other ethnic groups in Western  
6 countries<sup>5,6</sup>. These differences in CVD risk have also been shown to be present in South Asian  
7 children, suggesting that the risk differential in CVD risk factors and events experienced by this  
8 ethnic group starts from an early age<sup>7</sup>.

9 One of the major physiological risk factors for CVDs is high blood pressure (BP) or  
10 hypertension<sup>8</sup>. Hypertension is also associated with an increased risk for stroke and kidney  
11 disease<sup>8</sup>. Moreover, multiple studies have shown that high BP in childhood typically continues  
12 into adulthood<sup>9</sup> — including in South Asian populations<sup>10</sup>. These findings suggest that it is  
13 important to prevent hypertension in childhood in order to address the potential cardiovascular  
14 and metabolic sequelae later in life.

15 In South Asian children, studies have demonstrated increased prevalence of hypertension  
16 or higher BP levels relative to other ethnic groups<sup>11,12</sup>. While there is evidence suggesting a  
17 disproportionately higher BP burden for South Asians, the exact factors implicated are relatively  
18 unclear. Given the fact that causes of high BP are known to be multifactorial<sup>8</sup>, it is important to  
19 understand the various risk factors that might be responsible for the increased risk of high BP in  
20 South Asian children in general. Using a range of multifactorial variables (i.e. variables across a  
21 range of different factors) that were identified in a recently published systematic review of  
22 children to be correlated with BP and hypertension in other children population groups<sup>13</sup>, this  
23 study therefore aims: 1) to explore the associations between physiological (factors relating to

1 biology), lifestyle (factors relating to behaviour) and social factors (factors relating to conditions  
2 in which people live, attend school, grow, and develop) and BP in South Asian children; and 2)  
3 to identify the most important aggregate correlates of BP in South Asian children.

## 4 **METHODS**

### 5 **Study Design**

6 Participants included in this study were recruited as part of the Research in International  
7 Cardiovascular Health - Lifestyles, Environments and Genetic Attributes in Children and Youth  
8 (RICH-LEGACY) study. This cross-sectional study is designed to investigate risk factors for  
9 CVD across South Asian children in Canada. The study was approved by the Simon Fraser  
10 University Research Ethics Board (REB), Providence Health Care REB, and the Hamilton  
11 Integrated REB. Parents of participants provided written informed consent, while participants  
12 assented to take part in the study.

### 13 **Recruitment**

14 Elementary school and high-school children (n= 762) were recruited using community-  
15 based methods in two Canadian cities (Brampton, Ontario and Surrey, British Columbia) by  
16 convenience sampling between 2012 and 2016. Letters were first sent to school boards to  
17 identify elementary schools with a high rate of South Asian enrolment. Once schools were  
18 identified, packages containing an invitation letter, a RICH-LEGACY study description and  
19 consent forms were sent to parents/guardians of children enrolled in the identified schools.  
20 Information stands were also placed at the participating elementary schools before and after  
21 school hours to reach out to parents with more information about the study. Additionally, the  
22 study was advertised through venues used by South Asian groups including newspapers, local

1 television stations, community centres, worship centres and festivals. Inclusion criteria included:  
2 children (in elementary or high school) having at least three grandparents of South Asian origin;  
3 and participants being able to provide consent (parents) and assent (children). Research assistants  
4 fluent in Hindi and Punjabi were responsible for participant recruitment and data collection. The  
5 research assistants who were involved in the measurements all undertook training together  
6 through simulator sessions and were retrained if variations in measurement protocol were  
7 observed by the research coordinator. This process was repeated for a few days to ensure  
8 accuracy and consistency amongst the research assistants in the assessment of the measurements  
9 collected in this study. In addition, written materials (including consent forms) were provided in  
10 English, Punjabi, Hindi and Urdu as needed.

### 11 **Participant Assessment**

12 Participants for the RICH-LEGACY study were assessed regarding socio-demographic  
13 variables including age, sex and parental education. In certain cases, parents or guardians helped  
14 complete certain sections of the child's questionnaire. Children's perception of body image was  
15 assessed using Stunkard's silhouettes, a rating scale from one to nine with increases related to  
16 increased silhouette size<sup>14</sup>, that assesses perception of size and body dissatisfaction. This figure  
17 rating scale has been shown to be a valid indicator of determining weight status in children<sup>15</sup>.  
18 Feeding practices were assessed using the childhood feeding questionnaire<sup>16</sup>. Exposure to  
19 bullying was assessed by asking participants if they had experienced bullying or violence at  
20 school. This variable was assessed because of its role as a known stressor in children and its  
21 possible impact on pathways known to be involved in BP regulation such as the hypothalamic-  
22 pituitary-adrenal (HPA) axis<sup>17</sup>. Additionally, level of acculturation was assessed using the  
23 Acculturation Rating Scale for Mexican Americans-II (ARSMA- II) adapted for use in South



1  
2  
3 1 Asians by Stigler *et al*<sup>18</sup>. This scale assesses an individual's identification with their heritage  
4  
5 2 based on different domains including language preferences, media preferences, and preferences  
6  
7 3 regarding food and other consumer goods using 24 questions<sup>18</sup>. The adapted questionnaire is  
8  
9 4 grouped into two scales: the Western scale and the traditional scale. The traditional acculturation  
10  
11 5 score measures children's acceptance of traditional Indian cultural attributes while the  
12  
13 6 Westernized acculturation score measures the degree to which South Asian children identify with  
14  
15 7 Western culture.  
16  
17  
18  
19

20 8 Participants completed a semi-quantitative food frequency questionnaire (FFQ) that  
21  
22 9 assessed intake of fruits and vegetables and fast foods consumption. The FFQ was adapted from  
23  
24 10 the INTERHEART FFQ, which was validated in an international cohort that included South  
25  
26 11 Asians<sup>19</sup>. Physical activity was assessed using a standardized questionnaire that quantified sports  
27  
28 12 and other activities including leisure, household chores and sedentary factors (screen time and  
29  
30 13 homework) during school and outside of school over the past month. All activities were then  
31  
32 14 expressed as metabolic-equivalent-of-task (MET) minutes. Self-reported exposure to second-  
33  
34 15 hand smoke was assessed to characterize children's passive exposure to smoking and defined as  
35  
36 16 a minimum of five consecutive minutes during which inhalation of other people's smoke occurs.  
37  
38 17 Hand-grip strength, a measure of muscular strength, was measured on the non-dominant hand by  
39  
40 18 study personnel with a Jamar dynamometer utilizing standardized protocol<sup>20</sup>.  
41  
42  
43  
44  
45

### 46 19 **Anthropometric Characteristics**

47  
48 20 Height was measured to the nearest 0.1 cm using a right angle triangle and a calibrated  
49  
50 21 wall mounted scale. Weight was measured to the nearest 0.1 kg with the subject in light clothing  
51  
52 22 using an electronic scale. Body mass index (BMI) was first calculated from weight in kilograms  
53  
54  
55  
56  
57  
58  
59  
60

1 divided by height in meters squared before being converted to z-scores using WHO growth  
2  
3  
4  
5  
6  
7  
8  
9  
10  
11  
12  
13  
14  
15  
16  
17  
18  
19  
20  
21  
22  
23  
24  
25  
26  
27  
28  
29  
30  
31  
32  
33  
34  
35  
36  
37  
38  
39  
40  
41  
42  
43  
44  
45  
46  
47  
48  
49  
50  
51  
52  
53  
54  
55  
56  
57  
58  
59  
60

1 divided by height in meters squared before being converted to z-scores using WHO growth  
2 references for young people aged 5-19 years<sup>21</sup>.

3           Waist circumference (WC) was recorded in centimetres as the average of two measures  
4 taken halfway between the lower rib margin and the iliac crest against the skin following a  
5 normal expiration. Waist circumference was assessed using non-stretching measuring tape by  
6 trained team members. Waist-to-height ratio (WtHR) was then calculated by dividing waist  
7 circumference by height. Both WC and WtHR were transformed to z scores using published  
8 lambda-mu-sigma (LMS) values for age and sex based on the third US National Health and  
9 Nutrition Examination Survey (NHANES III)<sup>22</sup>. Transforming the anthropometric measures to z-  
10 scores allowed for the standardized comparisons across populations of children of similar ages  
11 and sex.

## 12 **Blood Pressure and Heart Rate**

13           Blood pressure and heart rate were measured in the left arm using the Omron HEM-  
14 711DLX automated blood pressure monitor with appropriate sized cuffs following 10 minutes of  
15 seated rest. Three BP and heart rate measures were taken over a 10-minute period and the  
16 average of the three was recorded. Subsequently, BP was transformed to standard deviation  
17 scores and percentiles adjusted for age, sex and height according to the fourth National High  
18 Blood Pressure Education Program (NHBPEP) working group in children and adolescents<sup>23</sup>.  
19 Systolic and diastolic hypertension were defined using the NHBPEP recommendations as  
20 average systolic blood pressure or diastolic blood pressure equal to or greater than the 95<sup>th</sup>  
21 percentile for sex, age and height.

## 22 **Parental Variables**

1  
2  
3 1 Parents of the children recruited for this study provided information on parental education  
4  
5 2 (father's and mother's education). In a smaller subset of the South Asian children (n=271),  
6  
7 3 parental history of hypertension (yes or no) was assessed in order to explore the potential impact  
8  
9 4 of heritable factors on children's BP z-scores and hypertension. Father's education was used as a  
10  
11 5 proxy variable for socioeconomic status in this study. Fathers' education levels were categorized  
12  
13 6 as: those with no formal education; those with primary/secondary school education; those with a  
14  
15 7 trade school degree/diploma; and those with a college or university degree. Parent's smoking  
16  
17 8 status was self-reported and categorized as non-smoker, former smoker, or current smoker.  
18  
19  
20  
21

## 22 9 **Statistical Analysis**

23  
24  
25 10 All continuous variables were examined using P-P plots and found to be normally  
26  
27 11 distributed. For descriptive analysis, continuous variables were presented as means and standard  
28  
29 12 deviations while categorical variables were reported as counts and percentages. Independent t-  
30  
31 13 test analysis was used to assess sex differences in continuous variables, while chi-square tests  
32  
33 14 were used to assess sex differences in categorical variables.  
34  
35  
36  
37

38 15 To explore the associations among the range of physiological, behavioural and  
39  
40 16 sociodemographic variables with systolic and diastolic BP, unadjusted linear regression was  
41  
42 17 used. These models were then adjusted for potential confounding effect of child age, sex and  
43  
44 18 father's education. These confounders were selected based on their well –documented  
45  
46 19 independent associations with the outcome variable in research studies<sup>11,13</sup>. Although, the  
47  
48 20 conversion of to z-scores provides age and sex adjusted data, we chose to still include age and  
49  
50 21 sex as confounders to adjust for potential residual effects unaccounted for by the reference chart  
51  
52 22 used in this study. Similarly, unadjusted and adjusted (age, sex and father's education) logistic  
53  
54  
55  
56  
57  
58  
59  
60

1 regression analysis was used to explore clinically-relevant associations among the multifactorial  
2 variables with systolic and diastolic hypertension. While age and sex were identified as potential  
3 confounders in the association between the other variables assessed in this study with BP and  
4 hypertension, we also wanted to examine their independent associations with BP and  
5 hypertension. To do this, they were each removed from the list of confounders we adjusted for  
6 when exploring their effect on BP z-scores and hypertension (i.e., sex was adjusted for age and  
7 father's education, while age was adjusted for sex and father's education.)

8 To address the second study objective, stepwise multiple linear regression analyses were  
9 used to identify the combination of risk factors that best explained the variance in BP in South  
10 Asian children. The stepwise regression method enables the identification of the aggregate  
11 combination of correlates that has the highest contributory effect to the outcome variable.  
12 Specifically, for this analysis, we utilized the backward method to select the list of multifactorial  
13 correlates that provide significant contribution to the outcome (systolic and diastolic BP z-  
14 scores) using an entry criterion of  $p < 0.05$  and a removal criterion of  $p > 0.10$ . The specific list of  
15 correlates (age, sex, height, weight, heart rate, BMI z-score, WC z-score, WHtR z-score, parental  
16 history of hypertension, parental education, exposure to bullying and violence, traditional and  
17 western acculturation scores, physical activity in school and outside school, dietary variables and  
18 second-hand smoking) considered for introduction in the backward stepwise regression model  
19 were chosen *a priori* based on literature evidence<sup>13</sup> and whether they had a p value  $< 0.05$  in  
20 unadjusted analysis. Using the aforementioned criteria, the following variables were considered  
21 in step-wise regression analysis: age, sex, height, weight, BMI z-score, WC z-score, WHtR z-  
22 score, heart rate, western acculturation score, child's perception of body image, and grip  
23 strength. In addition to these variables, father's education, daily intake of fast foods and total

1  
2  
3 1 daily intake were considered in diastolic BP z-score models. The adjusted R squared value for  
4  
5 2 each model provides the combined contribution of the variables in the model to the variance in  
6  
7 3 BP z-scores. The full list of variables initially identified from literature search were also  
8  
9 4 considered in logistic regression models with hypertension. Statistical analysis was done using  
10  
11 5 SPSS version 24.0. P values <0.05 were considered statistically significant. This study was  
12  
13 6 written in line with the Strengthening the Reporting of Observational studies in Epidemiology  
14  
15 7 (STROBE) guidelines<sup>24</sup>

## 8 **Patient and Public Involvement**

9 The research questions and outcome measures in this study were chosen by this team of  
10  
11 researchers and clinicians with extensive experience working with the South Asian population to  
12  
13 better understand the potential health risks faced by South Asian children. No patients were  
14  
15 involved in setting the research question in development of the research question or study design.  
16  
17 There are currently no plans to disseminate the results of this research study to study participants  
18  
19 or to the relevant patient population.

## 20 **RESULTS**

21 This study included 360 boys (47%) and 402 girls ranging from 5.8 to 17.0 years (mean  
22  
23 age  $9.5 \pm 3.0$  years), with no statistically significant difference observed for age by sex (table 1).  
24  
25 The prevalence of systolic hypertension in this population was 12%. South Asian boys were  
26  
27 more physically active outside school than girls ( $p=0.04$ ); higher WC z-score ( $p<0.001$ ); higher  
28  
29 WHtR z-score ( $p=0.02$ ); lower heart rate ( $p=0.047$ ); higher systolic BP z-scores ( $p=0.001$ );  
30  
31 higher prevalence of systolic hypertension ( $p=0.01$ ); had lower traditional acculturation score  
32  
33 ( $p=0.02$ ); and significantly higher exposure to bullying and violence at school ( $p=0.025$ ).  
34  
35  
36  
37  
38  
39  
40  
41  
42  
43  
44  
45  
46  
47  
48  
49  
50  
51  
52  
53  
54  
55  
56  
57  
58  
59  
60

## 1 Correlates of Systolic BP and Systolic Hypertension

2 In unadjusted linear regression analysis with systolic BP z-scores, weight (kg) ( $\beta = 0.005$ ,  
3 95% CI= 0.001, 0.01,  $p=0.022$ ), BMI z-score ( $\beta = 0.289$ , 95% CI= 0.246, 0.333,  $p<0.001$ ), WC z-  
4 score ( $\beta = 0.266$ , 95% CI= 0.213, 0.319,  $p<0.001$ ), WHtR z-score ( $\beta = 0.271$ , 95% CI= 0.219,  
5 0.324,  $p<0.001$ ), heart rate (beats per minute) ( $\beta = 0.019$ , 95% CI= 0.015, 0.023,  $p<0.001$ ), and  
6 the child's perception of their body image (using Stunkard's silhouettes) ( $\beta = 0.136$ , 95% CI=  
7 0.083, 0.189,  $p<0.001$ ) were found to be positively associated with systolic BP z-score. In  
8 contrast, we found that compared to male sex, female sex had lower systolic BP z-score ( $\beta = -$   
9 0.246, 95% CI= -0.385, -0.108,  $p<0.001$ ). Similarly, age (years) ( $\beta = -0.060$ , 95% CI= -0.084, -  
10 0.037,  $p<0.001$ ), children's western acculturation score ( $\beta = -0.021$ , 95% CI= -0.036, -0.006,  
11  $p=0.007$ ) and height (cm) ( $\beta = -0.006$ , 95% CI= -0.010, -0.002,  $p=0.007$ ) were negatively  
12 associated with systolic BP z-score. After adjustment for confounders, the association between  
13 western acculturation attenuated and became non-significant, while the association observed  
14 between height and systolic BP z-score became positive. Associations between children's grip  
15 strength and daily physical activity in school with systolic BP z-score also became significant  
16 upon adjustment (table 2).

17 In stepwise regression analysis, the combination of age, sex, BMI z-score, heart rate and  
18 weight were observed to be the most important correlates of systolic BP z-score, accounting for  
19 30% of the systolic BP z-score variance of South Asian children (Table 3).

20 In unadjusted logistic regression analysis, female sex was associated with lower odds of  
21 developing systolic hypertension (odds ratio (OR) = 0.56, 95% CI= 0.36, 0.87,  $p=0.011$ ).

22 Associations were also observed with weight (kg) and systolic hypertension (OR= 1.02, 95%

1  
2  
3 1 CI= 1.01, 1.04,  $p<0.001$ ), BMI z-score and systolic hypertension (OR= 2.22, 95% CI= 1.84,  
4  
5 2 2.68,  $p<0.001$ ), WC z-score and systolic hypertension (OR= 2.65, 95% CI= 2.06, 3.43,  $p<0.001$ )  
6  
7 3 and WHtR z-score and systolic hypertension (OR= 2.47, 95% CI= 1.95, 3.13,  $p<0.001$ ).  
8  
9 4 Similarly, associations were observed between heart rate (beats per minute) and systolic  
10  
11 5 hypertension (OR=1.04, 95% CI= 1.02, 1.06,  $p<0.001$ ), child's perception of body image and  
12  
13 6 systolic hypertension (OR= 1.50, 95% CI= 1.25, 1.79,  $p<0.001$ ) and western acculturation score  
14  
15 7 with systolic hypertension (OR= 0.95, 95% CI=0.90, 1.00,  $p=0.03$ ). Upon adjustment for  
16  
17 8 confounders, the associations between western acculturation score and systolic hypertension  
18  
19 9 attenuated and became non-significant. The association between grip strength and systolic  
20  
21 10 hypertension became significant upon adjustment (Figure 1).  
22  
23  
24  
25  
26

### 27 **Correlates of Diastolic BP and Diastolic Hypertension**

28  
29  
30 12 In unadjusted linear regression analysis of multifactorial variables with diastolic BP z-  
31  
32 13 score, negative associations with diastolic BP z-score were observed between age (years) ( $\beta= -$   
33  
34 14 0.061,  $p<0.001$ ), height (cm) ( $\beta= -0.009$ ,  $p<0.001$ ), western acculturation score ( $\beta= -0.018$ ,  
35  
36 15  $p=0.007$ ), fathers' level of education ( $\beta= -0.054$ ,  $p=0.047$ ), total daily food intake ( $\beta= -0.016$ ,  
37  
38 16  $p=0.005$ ), fast foods ( $\beta= -0.065$ ,  $p=0.048$ ) and grip strength (kg) ( $\beta= -0.019$ ,  $p<0.001$ ).  
39  
40  
41 17 Conversely, significant positive associations with diastolic BP z-score were observed between  
42  
43 18 heart rate ( $\beta= 0.018$ ,  $p<0.001$ ), BMI z-score ( $\beta= 0.156$ ,  $p<0.001$ ), WC z-score ( $\beta= 0.120$ ,  
44  
45 19  $p<0.001$ ), WHtR z-score ( $\beta= 0.128$ ,  $p<0.001$ ), and children's perception of their body image  
46  
47 20 (using Stunkard's silhouettes) ( $\beta= 0.053$ ,  $p=0.007$ ). After adjustment for confounders the  
48  
49 21 association between height, western acculturation score, father's level of education, total daily  
50  
51 22 food intake, fast food consumption and grip strength attenuated and became non-significant  
52  
53 23 (Table 2).  
54  
55  
56  
57  
58  
59  
60

1  
2  
3 1 In stepwise regression analysis, the combination of age, BMI z-score, heart rate and daily  
4  
5 2 intake of fast foods were observed to be the most important aggregate correlates of diastolic BP  
6  
7 3 z-score, accounting for 23% of the diastolic BP z-score variance of South Asian children (Table  
8  
9 4 3).

10  
11  
12  
13 5 In unadjusted logistic regression analysis, associations were observed between age  
14  
15 6 (years) (OR= 0.71, 95% CI= 0.55, 0.92, p=0.01), height (OR= 0.97, 95% CI= 0.94, 1.00,  
16  
17 7 p=0.04), BMI z-score (OR= 1.68, 95% CI= 1.31, 2.17, p<0.001), WC z-score (OR= 1.89, 95%  
18  
19 8 CI= 1.32, 2.70, p=0.001), WHtR z-score (OR= 1.77, 95% CI= 1.26, 2.47, p=0.001), heart rate  
20  
21 9 (beats per minute) (OR=1.06, 95% CI= 1.03, 1.10, p<0.001) and grip strength (kg) (OR= 0.92,  
22  
23 10 95% CI= 0.86, 0.99, p=0.024) with diastolic hypertension. Upon adjustment for confounders, the  
24  
25 11 association between height, grip strength and diastolic hypertension attenuated and became non-  
26  
27 12 significant (Figure 2).

## 13 **DISCUSSION**

14  
15 14 This study provides information on a range of correlates of systolic and diastolic BP z-  
16  
17 15 scores in a population of South Asian children. While results from unadjusted models highlight  
18  
19 16 the presence of a multifactorial relationship for BP and hypertension, the disappearance of most  
20  
21 17 of the social and lifestyle risk factors upon adjustment highlights the contribution of variables  
22  
23 18 such as age, sex, adiposity, height, heart rate, and grip strength to the risk of elevated BP and  
24  
25 19 hypertension in South Asian children.

26  
27  
28  
29  
30  
31  
32  
33  
34  
35  
36  
37  
38  
39  
40  
41  
42  
43  
44  
45  
46  
47  
48  
49  
50  
51 20 It is well documented that the burden of hypertension has precipitously increased in the  
52  
53 21 pediatric population<sup>25</sup>. In addition, some studies have documented higher prevalence of  
54  
55 22 hypertension in certain ethnic groups such as South Asians<sup>11</sup>. Although our sample was based on  
56  
57  
58  
59  
60



1  
2  
3 1 convenience and non-representative given that sampling was restricted to two Canadian cities,  
4  
5 2 the prevalence of hypertension in our study at 12% is consistent with age, sex and height  
6  
7 3 adjusted estimates from Jafar *et al*<sup>11</sup> using a nationally-representative survey of Pakistani  
8  
9 4 children age 5 to 14 years, but higher than 5.2% prevalence from one cross-sectional study of  
10  
11 5 Indian children ages 5 to 12 years<sup>26</sup>. Our estimates also appear higher than estimates from  
12  
13 6 Canadian children ages 6 to 19 years where 4% of children were said to have hypertension and  
14  
15 7 prehypertension<sup>27</sup>. When stratified by sex, we found significantly higher rates were observed for  
16  
17 8 boys at 15% compared to girls at 9%. This is consistent with results from studies in other  
18  
19 9 children which have reported higher hypertension prevalence in boys<sup>28,29</sup>, and results from  
20  
21 10 regression analysis which found female sex to be associated with lower odds of hypertension.  
22  
23 11 This risk differential has been attributed to the presence of an anti-inflammatory immune profile  
24  
25 12 in females and pro-inflammatory profile in males<sup>30</sup> — underscoring the potential for intervention  
26  
27 13 efforts aimed at addressing sex-based disparities.

28  
29  
30  
31  
32  
33  
34 14 Consistent with research conducted in South Asian children<sup>11,31</sup> and research conducted  
35  
36 15 in other childhood populations of different ethnicities<sup>28,32–36</sup>, we observed positive associations  
37  
38 16 between measures of adiposity and BP and hypertension after adjusting for covariates. The  
39  
40 17 consistency of the association observed across the range of adiposity metrics assessed  
41  
42 18 underscores the significant contribution of increasing adiposity to the prevalence of hypertension  
43  
44 19 in South Asian children. Moreover, the positive association between grip strength (a measure of  
45  
46 20 muscle strength) with systolic BP z-score and hypertension upon adjustment in this study raises  
47  
48 21 questions about the benefits of strength training in children. The benefits of physical activity  
49  
50 22 including aerobic exercise in relation to hypertension remain clear; however, the benefits of  
51  
52 23 strength training in relation to hypertension risk, relative to the benefits of aerobic exercise,  
53  
54  
55  
56  
57  
58  
59  
60

1  
2  
3 1 appear questionable<sup>37</sup>. It is unclear what might be responsible for the positive effect observed  
4  
5 2 between grip strength and systolic BP z-score; however, findings from our study appear  
6  
7 3 consistent with studies which have explored this association in Chinese<sup>38</sup> and American  
8  
9 4 children<sup>39</sup>.

10  
11  
12  
13 5 The consistent association between adiposity and hypertension, including the higher  
14  
15 6 prevalence of hypertension in this population, reinforces their connections through a range of  
16  
17 7 complex mechanistic pathways. Some of these pathways involve the activation of the renin-  
18  
19 8 angiotensin-aldosterone system (RAAS) or sympathetic nervous system. Specifically, the South  
20  
21 9 Asian phenotype of higher body fat<sup>7</sup>—especially the visceral type which has been identified in  
22  
23 10 adults<sup>6</sup>—when compared to their Caucasian peers, could activate the formation of pro-  
24  
25 11 inflammatory cytokines such as Interleukin 6 (IL-6) which results in physiological changes that  
26  
27 12 could lead to endothelial and vascular dysfunction through the development of insulin  
28  
29 13 resistance<sup>40</sup>, resulting in an increased predisposition for hypertension. The positive association  
30  
31 14 between height and BP in this population could be explained by cerebral perfusion requirements  
32  
33 15 where higher BP is needed in taller people to achieve optimal cerebral perfusion owing to  
34  
35 16 hydrostatic pressure differences in taller and shorter individuals<sup>41</sup>. However, more research in  
36  
37 17 South Asian children is warranted to corroborate our findings given the difference observed in  
38  
39 18 direction of association in unadjusted and adjusted models.  
40  
41  
42  
43  
44  
45

46 19 The positive association we found between the child's perception of body image and BP  
47  
48 20 may be due to this variable mirroring children's weight status or conversely, a marker for a  
49  
50 21 graded increase in stress levels, owing to societal criticism of fatter body types, which could  
51  
52 22 have insidious effects for hypertension risk through its impact on the neuro-endocrine system<sup>42</sup>.  
53  
54 23 Additionally, a range of social and lifestyle variables were also found to be associated with BP z-  
55  
56  
57  
58  
59  
60

1 score in unadjusted analysis but became non-significant upon adjustment for confounders. While  
2 results from unadjusted associations may demonstrate links between risk factor and outcome, the  
3 disappearance of the association upon adjustment for socio-demographic variables highlights the  
4 links between these variables and suggests that the pathway linking these factors with BP might  
5 be interdependent.

6 The stepwise regression model shows that correlates from this study explained only about  
7 30% of the variance of systolic BP z-score and 23% of the variability of diastolic BP z-scores. It  
8 is possible that some of this unexplained variance might be explained by genetics, as it has been  
9 suggested that about 30% to 60% of the variance in BP may be heritable<sup>43,44</sup>. Yet the lack of  
10 association between parental hypertension and child BP in the subset of parents of participants  
11 who provided this data would appear to contradict these findings for this population of South  
12 Asian children. However, it is likely that the subset of parents of child participants who provided  
13 this information might not be completely representative of the entire cohort, thereby biasing the  
14 results. Still, even accounting for potential genetic contributions, a significant amount of the BP  
15 variance remains unexplained. More research is needed to provide insight regarding the  
16 contributory effects of other potential variables that might contribute to risk of elevated BP in  
17 South Asian children.

18 Notably, null associations were also observed for certain variables in this study that have  
19 been found to be significantly associated with BP and hypertension in other child populations.  
20 For example, parental history of hypertension, dietary factors (such as consumption of fruit and  
21 vegetables) and exposure to second hand smoking have been linked in other studies to child BP  
22 but had no significant impact in this study. This could be reflective of the potential biases  
23 associated with using self-reports or may highlight how interactions between genes and

1  
2  
3 1 environment/lifestyle shape risk factor susceptibilities — underscoring the need for more ethnic-  
4  
5 2 based and ethnic comparison studies when exploring risk associations.  
6  
7

### 8 9 3 **Study Limitations**

10  
11 4 This study has limitations. First, although we sought to recruit a representative sample of  
12  
13 5 urban South Asian children, it was not a random sample. However, there is likely to be minimal  
14  
15 6 effect on the relationships between the ranges of risk factors evaluated in this study. Second, this  
16  
17 7 is a cross-sectional study and is therefore unable to provide insights into causal associations  
18  
19 8 between the risk factor variables and long term CVD risk in South Asian children. Third,  
20  
21 9 potential recall biases may have occurred as a result of using self-report data for some of the  
22  
23 10 variables including diet and physical activity measures. Fourth, the use of father's education as a  
24  
25 11 measure of socioeconomic status pose limitations. Variables like household income would have  
26  
27 12 been preferred, however only a subset of participants provided data on household income, thus  
28  
29 13 its use would have excluded a significant portion of children in this study. However, as a means  
30  
31 14 to confirm the results, we separately adjusted for mother's education and no deviation in study  
32  
33 15 results was observed. Last, the lack of data collection on sexual maturity status could potential  
34  
35 16 confound the study results obtained here. However, the adjustment for age in this study, which  
36  
37 17 acts as a proxy variable for sexual maturity might help mitigate the bias. These limitations are in  
38  
39 18 part addressed by strengths of this study which lies in its large sample size of South Asian  
40  
41 19 children and in the wide range of risk factors examined.  
42  
43  
44  
45  
46  
47  
48

### 49 20 **Implications**

50  
51  
52 21 Our findings underscore a range of factors that may contribute to risk of elevated BP and  
53  
54 22 hypertension in South Asian children. Consequently, public health interventions such as those  
55  
56  
57

1 that emphasize prevention such as population-based health education and lifestyle modification  
2 that considers unique cultural contexts may provide significant potential in addressing the burden  
3 of hypertension in this population. There are also implications for clinical settings. Specifically,  
4 our findings suggest that while South Asian children may benefit from interventions aimed at  
5 reducing obesity to address the comparatively higher burden of hypertension in this population,  
6 there are certain sub-groups who could benefit from more targeted preventive interventions in  
7 primary care settings — such as males, children with increased adiposity, taller children, and  
8 children with increased heart rate, or children with a combination of these factors.

## 9 CONCLUSION

10 In this group of South Asian children, we found associations between a range of  
11 physiological, social and lifestyle factors with BP z-scores and hypertension. However, upon  
12 adjustment for confounders, physiological variables such as age, sex, height, adiposity and heart  
13 rate remained consistently associated with BP and hypertension, and provided the strongest  
14 explanatory effect for the variance in BP. Given the sequelae associated with elevated BP,  
15 including BP tracking from childhood into adulthood, these results provide evidence on  
16 modifiable risk factors that might be targeted by prevention strategies in primary care to reduce  
17 the burden of high BP and hypertension in South Asian children.

18 **Author contributions:** Dr. Scott, Dr. Punthakee, Dr. Morrison, Dr. Gupta, Dr. Teo and Sumathy  
19 Rangarajan conceptualized the study, contributed to study design and reviewed the manuscript.  
20 Adeleke Fowokan conceptualized the study, drafted the initial manuscript, carried out statistical  
21 analysis and revised the manuscript. Dr. Waddell and Dr. Rosin contributed to the design of the  
22 study, reviewed and revised the manuscript.

23 All authors approved the final manuscript as submitted and agree to be accountable for all  
24 aspects of the work.

25 **Funding:** This study was funded by the Canadian Institutes of Health Research (FRN: 109206)

1  
2  
3 1 **Acknowledgements:** Dr. Lear is the Pfizer/Heart and Stroke Foundation Chair in Cardiovascular  
4 2 Prevention Research at St. Paul's Hospital. Research coordinators Pam Mackie, Michelle  
5 3 Tsigoulis, Veronica de Jong, Vaven Ghaat, Erica Corber and Amanpreet Thind were  
6 4 instrumental in completing the data collection for this project.

8  
9 5 **Competing interests:** None declared

10  
11 6 **Ethics Approval:** Simon Fraser University Research Ethics Board (REB), Providence Health  
12 7 Care REB, and the Hamilton Integrated REB

13  
14 8 **Data sharing statement:** Raw data are held by the lead author of the study in accordance with  
15 9 ethics guidelines.

16  
17 10

18  
19  
20  
21  
22  
23  
24  
25  
26  
27  
28  
29  
30  
31  
32  
33  
34  
35  
36  
37  
38  
39  
40  
41  
42  
43  
44  
45  
46  
47  
48  
49  
50  
51  
52  
53  
54  
55  
56  
57  
58  
59  
60

For peer review only

1  
2  
3 **1 References**  
4  
5

- 6 2 1. Population Reference Bureau. 2017 World Population Data Sheet. PRB's 2017 World  
7 3 Population Data Sheet.
- 8 4 2. Statistics Canada. Immigration and Ethnocultural Diversity in Canada. National  
9 5 Household Survey, 2011. National Household Survey, 2011. doi:99-010-X2011001
- 10 6 3. UK Office for National Statistics. Ethnicity and National Identity in England and Wales.  
11 7 [Http://Www.Ons.Gov.Uk](http://www.ons.gov.uk).
- 12 8 4. Hoeffel EM, Rastogi S, Kim MO, Shahid H. The Asian Population: 2010. *2010 Census*  
13 9 *Briefs*. 2012;(March):1-23.
- 14 10 5. Anand SS, Yusuf S, Vuksan V, et al. Differences in risk factors, atherosclerosis, and  
15 11 cardiovascular disease between ethnic groups in Canada: the Study of Health Assessment  
16 12 and Risk in Ethnic groups (SHARE). *Lancet*. 2000;356(9226):279-284.  
17 13 doi:10.1016/S0140-6736(00)02502-2
- 18 14 6. Lear SA, Humphries KH, Kohli S, Chockalingam A, Frohlich JJ, Birmingham CL.  
19 15 Visceral adipose tissue accumulation differs according to ethnic background: Results of  
20 16 the Multicultural Community Health Assessment Trial (M-CHAT). *Am J Clin Nutr*.  
21 17 2007;86(2):353-359.
- 22 18 7. J Eyre EL, Duncan MJ, Nevill A. South Asian Children Have Increased Body Fat in  
23 19 Comparison to White Children at the Same Body Mass Index.  
24 20 doi:10.3390/children4110102
- 25 21 8. WHO. *A Global Brief on Hypertension*.; 2013. doi:10.1136/bmj.1.4815.882-a
- 26 22 9. Chen X, Wang Y. Tracking of blood pressure from childhood to adulthood: A systematic  
27 23 review and meta-regression analysis. *Circulation*. 2008;117(25):3171-3180.  
28 24 doi:10.1161/CIRCULATIONAHA.107.730366
- 29 25 10. Soudarssanane M, Mathanraj S, Sumanth M, Sahai A, Karthigeyan M. Tracking of blood  
30 26 pressure among adolescents and young adults in an urban slum of puducherry. *Indian J*  
31 27 *Community Med*. 2008;33(2):107-112. doi:10.4103/0970-0218.40879
- 32 28 11. Jafar TH, Islam M, Poulter N, et al. Children in South Asia have higher body mass-  
33 29 adjusted blood pressure levels than white children in the United States: a comparative  
34 30 study. *Circulation*. 2005;111(10):1291-1297. doi:10.1161/01.CIR.0000157699.87728.F1
- 35 31 12. Henderson EJ, Jones CHD, Hornby-Turner YC, Pollard TM. Adiposity and blood pressure  
36 32 in 7- to 11-year-old children: Comparison of British Pakistani and white British children,  
37 33 and of British Pakistani children of migrant and British-born mothers. *Am J Hum Biol*.  
38 34 2011;23(5):710-716. doi:10.1002/ajhb.21204
- 39 35 13. Fowokan AO, Sakakibara BM, Onsel N, et al. Correlates of elevated blood pressure in  
40 36 healthy children: a systematic review. *Clin Obes*. July 2018. doi:10.1111/cob.12271



- 1  
2  
3 1 14. Stunkard AJ. Use of the Danish Adoption Register for the study of obesity and thinness.  
4 2 *Res Publ Assoc Res Nerv Ment Dis.* 1983;60:115-120.  
5 3 <https://ci.nii.ac.jp/naid/10025281459/>. Accessed August 8, 2018.  
6  
7 4 15. Lo WS, Ho SY, Mak KK, Lam TH. The Use of Stunkard's Figure Rating Scale to Identify  
8 5 Underweight and Overweight in Chinese Adolescents. *PLoS One.* 2012;7(11).  
9 6 doi:10.1371/journal.pone.0050017  
10  
11 7 16. Birch L., Fisher J., Grimm-Thomas K, Markey C., Sawyer R, Johnson S. Confirmatory  
12 8 factor analysis of the Child Feeding Questionnaire: a measure of parental attitudes, beliefs  
13 9 and practices about child feeding and obesity proneness. *Appetite.* 2001;36(3):201-210.  
14 10 doi:10.1006/APPE.2001.0398  
15  
16 11 17. Rivara F, Menestrel S Le, Prevention C on the B and PE of PVL for B, et al. *Preventing*  
17 12 *Bullying Through Science, Policy, and Practice.* National Academies Press (US); 2016.  
18 13 doi:10.17226/23482  
19  
20 14 18. Stigler M, Dhavan P, Van Dusen D, Arora M, Reddy KS, Perry CL. Westernization and  
21 15 tobacco use among young people in Delhi, India. *Soc Sci Med.* 2010;71(5):891-897.  
22 16 doi:10.1016/j.socscimed.2010.06.002  
23  
24 17 19. Iqbal R, Anand S, Ounpuu S, et al. Dietary patterns and the risk of acute myocardial  
25 18 infarction in 52 countries: Results of the INTERHEART study. *Circulation.*  
26 19 2008;118(19):1929-1937. doi:10.1161/CIRCULATIONAHA.107.738716  
27  
28 20 20. Roberts HC, Denison HJ, Martin HJ, et al. A review of the measurement of grip strength  
29 21 in clinical and epidemiological studies: Towards a standardised approach. *Age Ageing.*  
30 22 2011;40(4):423-429. doi:10.1093/ageing/afr051  
31  
32 23 21. de Onis M, Onyango AW, Borghi E, Siyam A, Nishida C, Siekmann J. Development of a  
33 24 WHO growth reference for school-aged children and adolescents. *Bull World Health*  
34 25 *Organ.* 2007;85(9):660-667. doi:10.2471/blt.07.043497  
35  
36 26 22. Sharma AK, Metzger DL, Daymont C, Hadjiyannakis S, Rodd CJ. LMS tables for waist-  
37 27 circumference and waist-height ratio Z-scores in children aged 5–19 y in NHANES III:  
38 28 association with cardio-metabolic risks. 2015;78:Pediatric Research.  
39 29 <http://www.nature.com/pr/journal/v78/n6/full/pr2015160a.html>. Accessed July 27, 2017.  
40  
41 30 23. National High Blood Pressure Education Program Working Group on High Blood. The  
42 31 fourth report on the diagnosis, evaluation, and treatment of high blood pressure in children  
43 32 and adolescents. *Pediatrics.* 2004;114(2 Suppl 4th Report):555-576.  
44 33 doi:10.1542/peds.114.2.S2.555  
45  
46 34 24. von Elm E, Altman DG, Egger M, et al. The Strengthening the Reporting of Observational  
47 35 Studies in Epidemiology (STROBE) statement: guidelines for reporting observational  
48 36 studies. *J Clin Epidemiol.* 2008;61(4):344-349. doi:10.1016/j.jclinepi.2007.11.008  
49  
50 37 25. Din-Dzietham R, Liu Y, Bielo MV, Shamsa F. High blood pressure trends in children and  
51 38 adolescents in national surveys, 1963 to 2002. *Circulation.* 2007;116(13):1488-1496.  
52  
53  
54  
55  
56  
57  
58  
59  
60



- 1  
2  
3  
4  
5  
6  
7  
8  
9  
10  
11  
12  
13  
14  
15  
16  
17  
18  
19  
20  
21  
22  
23  
24  
25  
26  
27  
28  
29  
30  
31  
32  
33  
34  
35  
36  
37  
38  
39  
40  
41  
42  
43  
44  
45  
46  
47  
48  
49  
50  
51  
52  
53  
54  
55  
56  
57  
58  
59  
60
- 1 doi:10.1161/CIRCULATIONAHA.106.683243
- 2 26. Genovesi S, Antolini L, Gallieni M, et al. High prevalence of hypertension in normal and  
3 underweight Indian children. *J Hypertens*. 2011;29(2):217-221.  
4 doi:10.1097/HJH.0b013e3283407fe3
- 5 27. Statistics Canada. Blood pressure of Canadian children and youth, 2009 to 2011.  
6 <http://www.statcan.gc.ca/pub/82-625-x/2012001/article/11713-eng.htm>. Accessed August  
7 30, 2017.
- 8 28. Huntington-Moskos L, Turner-Henson A, Rice M. Tobacco exposure, weight status, and  
9 elevated blood pressure in adolescents. *J Community Health*. 2014;39(4):653-659.  
10 doi:10.1007/s10900-014-9839-5
- 11 29. Leung LCK, Sung RYT, So H-K, et al. Prevalence and risk factors for hypertension in  
12 Hong Kong Chinese adolescents: waist circumference predicts hypertension, exercise  
13 decreases risk. *Arch Dis Child*. 2011;96(9):804-809. doi:10.1136/adc.2010.202770
- 14 30. Gillis EE, Sullivan JC. Sex Differences in Hypertension: Recent Advances. *Hypertension*.  
15 2016;68(6):1322-1327. doi:10.1161/HYPERTENSIONAHA.116.06602
- 16 31. Goel M, Pal P, Agrawal A, Ashok C. Relationship of body mass index and other life style  
17 factors with hypertension in adolescents. *Ann Pediatr Cardiol*. 2016;9(1):29.  
18 doi:10.4103/0974-2069.171393
- 19 32. Moser DC, Giuliano I de CB, Titski ACK, Gaya AR, Coelho-e-Silva MJ, Leite N.  
20 Anthropometric measures and blood pressure in school children. *J Pediatr (Rio J)*.  
21 2013;89(3):243-249. doi:10.1016/j.jped.2012.11.006
- 22 33. Flores-Huerta S, Klünder-Klünder M, Reyes de la Cruz L, Santos JI. Increase in Body  
23 Mass Index and Waist Circumference Is Associated with High Blood Pressure in Children  
24 and Adolescents in Mexico City. *Arch Med Res*. 2009;40(3):208-215.  
25 doi:10.1016/j.arcmed.2009.02.009
- 26 34. Wang H, Necheles J, Carnethon M, et al. Adiposity measures and blood pressure in  
27 Chinese children and adolescents. *Arch Dis Child*. 2008;93(9):738-744.  
28 doi:10.1136/adc.2007.127589
- 29 35. Mirzaei M, Taylor R, Morrell S, Leeder SR. Predictors of blood pressure in a cohort of  
30 school-aged children. *Eur J Cardiovasc Prev Rehabil*. 2007;14(5):624-629.  
31 doi:10.1097/HJR.0b013e32828621c6
- 32 36. Lurbe E, Torro I, Rodríguez C, Alvarez V, Redón J. Birth weight influences blood  
33 pressure values and variability in children and adolescents. *Hypertens (Dallas, Tex 1979)*.  
34 2001;38(3):389-393. <http://www.ncbi.nlm.nih.gov/pubmed/11566910>. Accessed January  
35 17, 2017.
- 36 37. Pescatello LS, MacDonald H V., Lamberti L, Johnson BT. Exercise for Hypertension: A  
37 Prescription Update Integrating Existing Recommendations with Emerging Research.  
38 *Curr Hypertens Rep*. 2015;17(11). doi:10.1007/s11906-015-0600-y

- 1  
2  
3 1 38. Dong B, Wang Z, Arnold L, Song Y, Wang HJ, Ma J. The association between blood  
4 2 pressure and grip strength in adolescents: Does body mass index matter. *Hypertens Res.*  
5 3 2016;39(12):919-925. doi:10.1038/hr.2016.84  
6  
7 4 39. Zhang R, Li C, Liu T, Zheng L, Li S. Handgrip Strength and Blood Pressure in Children  
8 5 and Adolescents: Evidence from. 2011;31(July):792-796.  
9 6 doi:10.1093/ajh/hpy032/4883259  
10  
11 7 40. Van kova I, Maletinska L, Behuliak M, Nagelova V, Zicha J, Kune J. Obesity-related  
12 8 hypertension: possible pathophysiological mechanisms. *J Endocrinol.* 2014;223(3):R63-  
13 9 R78. doi:10.1530/JOE-14-0368  
14  
15 10 41. Roth J V. Taller People Should Have as Their Normal a Higher Body Mass Index.  
16 11 *Anesthesiology.* 2018;128(2):424. doi:10.1097/ALN.0000000000001998  
17  
18 12 42. Spruill T. Chronic Psychological Stress and Hypertension. *Curr Hypertens Rep.*  
19 13 2013;12(1):10-16. doi:10.1007/s11906-009-0084-8.Chronic  
20  
21 14 43. Vehaskari VM. Heritable forms of hypertension. *Pediatr Nephrol.* 2009;24(10):1929-  
22 15 1937. doi:10.1007/s00467-007-0537-8  
23  
24 16 44. Ehret GB. Genome-wide association studies: contribution of genomics to understanding  
25 17 blood pressure and essential hypertension. *Curr Hypertens Rep.* 2010;12(1):17-25.  
26 18 doi:10.1007/s11906-009-0086-6  
27  
28  
29  
30  
31  
32  
33  
34  
35  
36  
37  
38  
39  
40  
41  
42  
43  
44  
45  
46  
47  
48  
49  
50  
51  
52  
53  
54  
55  
56  
57  
58  
59  
60

1 Table 1: Sociodemographic, anthropometric, risk factor characteristics of South Asian children  
 2 stratified by sex.

|                                                                    | Total (n=762) | Boy (n=360) | Girl (n=402) | p value |
|--------------------------------------------------------------------|---------------|-------------|--------------|---------|
| Age (years)                                                        | 9.5 ± 3.0     | 9.3 ± 2.8   | 9.7 ± 3.1    | 0.09    |
| Paternal education                                                 |               |             |              | 0.92    |
| No formal education                                                | 5 (1%)        | 3 (1%)      | 2 (1%)       |         |
| Primary education                                                  | 247 (34%)     | 115 (34%)   | 132 (35%)    |         |
| Trade school                                                       | 21 (3%)       | 9 (3%)      | 12 (3%)      |         |
| College/university                                                 | 444 (62%)     | 209 (62%)   | 235 (62%)    |         |
| Maternal education                                                 |               |             |              | 0.363   |
| No formal education                                                | 5 (1%)        | 4 (1%)      | 1 (0%)       |         |
| Primary education                                                  | 223 (30%)     | 103 (30%)   | 120 (31%)    |         |
| Trade school                                                       | 6 (1%)        | 4 (1%)      | 2 (1%)       |         |
| College/university                                                 | 503 (68%)     | 235 (68%)   | 268 (69%)    |         |
| Acculturation score (western)                                      | 34.8 ± 4.7    | 34.6 ± 4.62 | 34.9 ± 4.74  | 0.426   |
| Acculturation score (traditional)                                  | 26.7 ± 4.43   | 26.3 ± 4.35 | 27.1 ± 4.48  | 0.02    |
| Daily physical activity in school (METmins/day)                    | 35.7 ± 25.8   | 36.8 ± 27.0 | 34.8 ± 24.7  | 0.288   |
| Daily physical activity outside school (METmins/day)               | 15.9 ± 33.9   | 18.5 ± 31.3 | 13.5 ± 35.9  | 0.04    |
| Daily intake- servings of fruit and vegetables (daily mean intake) | 3.16 ± 1.86   | 3.11 ± 1.81 | 3.21 ± 1.91  | 0.485   |
| Daily intake- servings of fast foods (daily mean intake)           | 0.91 ± 0.78   | 0.86 ± 0.59 | 0.97 ± 0.91  | 0.067   |
| Total daily intake- servings                                       | 12.0 ± 4.48   | 12.2 ± 4.9  | 11.8 ± 4.1   | 0.243   |
| Exposure to bullying/violence at school                            |               |             |              | 0.025   |
| Yes                                                                | 233 (34%)     | 126 (38%)   | 107 (30%)    |         |

|                                  |                     |              |              |              |        |
|----------------------------------|---------------------|--------------|--------------|--------------|--------|
|                                  | No                  | 459 (66%)    | 207 (62%)    | 252 (70%)    |        |
| Exposure to second hand smoking* |                     |              |              |              | 0.616  |
|                                  | None                | 712 (94%)    | 336 (94%)    | 376 (94%)    |        |
|                                  | 1-2 times/week      | 33 (4%)      | 16 (5%)      | 17 (4%)      |        |
|                                  | 3-6 times/week      | 5 (1%)       | 2 (1%)       | 3 (1%)       |        |
|                                  | At least once a day | 7 (1%)       | 5 (1%)       | 2 (1%)       |        |
|                                  | 2-3 times/day       | 1 (0%)       | 0 (0%)       | 1 (0%)       |        |
| Mother's history of hypertension |                     |              |              |              | 0.047  |
|                                  | Yes                 | 12 (4%)      | 9 (7%)       | 3 (2%)       |        |
|                                  | No                  | 280 (96%)    | 128 (93%)    | 152 (98%)    |        |
| Father's history of hypertension |                     |              |              |              | 0.979  |
|                                  | Yes                 | 30 (10%)     | 14 (10%)     | 16 (10%)     |        |
|                                  | No                  | 260 (90%)    | 122 (90%)    | 138 (90%)    |        |
| Height (cm)                      |                     | 138.3 ± 16.5 | 139.1 ± 17.6 | 137.7 ± 15.5 | 0.22   |
| Weight (kg)                      |                     | 36.5 ± 15.8  | 36.9 ± 16.5  | 36.1 ± 15.3  | 0.46   |
| BMI Z score                      |                     | 0.48 ± 1.44  | 0.57 ± 1.61  | 0.40 ± 1.28  | 0.11   |
| WC Z score                       |                     | -0.06 ± 1.23 | 0.11 ± 0.36  | -0.21 ± 1.24 | <0.001 |
| WHtR Z score                     |                     | -0.38 ± 1.24 | -0.27 ± 1.27 | -0.48 ± 1.21 | 0.02   |
| Heart rate                       |                     | 87 ± 12      | 86 ± 12      | 87 ± 13      | 0.047  |
| SBP Z score                      |                     | 0.57 ± 0.97  | 0.70 ± 0.99  | 0.46 ± 0.95  | 0.001  |
| DBP Z score                      |                     | 0.37 ± 0.71  | 0.35 ± 0.68  | 0.39 ± 0.73  | 0.41   |
| SBP (non-transformed)            |                     | 109 ± 11     | 111 ± 12     | 107 ± 10     | <0.001 |

|                        |          |          |         |       |
|------------------------|----------|----------|---------|-------|
| DBP (non-transformed)  | 65 ± 8   | 65 ± 8   | 65 ± 8  | 0.849 |
| Systolic hypertension  | 90 (12%) | 54 (15%) | 36 (9%) | 0.01  |
| Diastolic hypertension | 31 (4%)  | 13 (4%)  | 18 (5%) | 0.55  |

1 \*Exposure defined as a minimum of five consecutive minutes during which inhalation of other  
 2 people's smoke occurs  
 3 BP=Blood pressure, BMI=body mass index, WC= waist circumference, WHtR= waist to height  
 4 ratio, SBP= systolic blood pressure, DBP= diastolic blood pressure  
 5  
 6  
 7  
 8

For peer review only

1 Table 2: Adjusted linear regression between multifactorial risk factors with systolic and diastolic  
 2 BP z scores

|                                         | Systolic BP z score              | Diastolic BP z score             |
|-----------------------------------------|----------------------------------|----------------------------------|
| Age <sup>a</sup>                        | -0.054 (-0.078, -0.029), p<0.001 | -0.057 (-0.075, -0.039), p<0.001 |
| Female sex (vs Male) <sup>b</sup>       | -0.208 (-0.350, -0.067), p=0.004 | 0.078 (-0.023, 0.179), p=0.132   |
| Height                                  | 0.022 (0.011, 0.033), p<0.001    | 0.007 (-0.001, 0.015), p=0.077   |
| Weight                                  | 0.047 (0.040, 0.055), p<0.001    | 0.022 (0.016, 0.027), p<0.001    |
| BMI z score                             | 0.292 (0.249, 0.336), p<0.001    | 0.160 (0.127, 0.193), p<0.001    |
| WC z score                              | 0.273 (0.219, 0.326), p<0.001    | 0.137 (0.098, 0.177), p<0.001    |
| WHtR z score                            | 0.289 (0.236, 0.342), p<0.001    | 0.153 (0.114, 0.192), p<0.001    |
| Heart rate                              | 0.016 (0.010, 0.022), p<0.001    | 0.015 (0.011, 0.019), p<0.001    |
| Acculturation (western score)           | -0.010 (-0.026, 0.006), p=0.211  | -0.005 (-0.016, 0.006), p=0.373  |
| Acculturation (traditional score)       | 0.010 (-0.006, 0.026), p=0.227   | 0.003 (-0.008, 0.015), p=0.582   |
| Child's perception of body image        | 0.183 (0.128, 0.239), p<0.001    | 0.104 (0.064, 0.144), p<0.001    |
| Exposure to bullying/violence at school | 0.021 (-0.138, 0.181), p=0.794   | -0.071 (-0.183, 0.042), p=0.218  |
| Father's smoking status                 | 0.118 (-0.056, 0.292), p=0.184   | 0.082 (-0.053, 0.218), p=0.233   |
| Exposure to second hand smoke           | -0.052 (-0.240, 0.136), p=0.587  | 0.018 (-0.117, 0.152), p=0.795   |
| Father's history of                     | -0.127 (-0.484, 0.230), p=0.484  | -0.063 (-0.336, 0.209), p=0.648  |

|                                                        |                                 |                                 |
|--------------------------------------------------------|---------------------------------|---------------------------------|
| hypertension                                           |                                 |                                 |
| Mother's history of hypertension                       | -0.003 (-0.524, 0.518), p=0.991 | 0.354 (-0.042, 0.750), p=0.079  |
| Grip strength (non-dominant hand)                      | 0.025 (0.007, 0.043), p=0.007   | 0.006 (-0.007, 0.019), p=0.381  |
| Daily physical activity in school (METmins/day)        | 0.005 (0.002, 0.008), p=0.003   | 0.003 (0.001, 0.005), p=0.009   |
| Daily physical activity outside school (METmins/day)   | 0.001 (-0.001, 0.003), p=0.363  | 0.000 (-0.002, 0.002), p=0.994  |
| Daily intake- fruit and vegetables (daily mean intake) | -0.008 (-0.049, 0.033), p=0.717 | -0.011 (-0.040, 0.018), p=0.466 |
| Daily intake-fast foods (daily mean intake)            | 0.004 (-0.086, 0.093), p=0.937  | -0.053 (-0.117, 0.011), p=0.104 |

1 *Model adjusted for age, sex and father's education*

2 *Values presented are  $\beta$  (95% confidence intervals), and p values*

3 *BMI= body mass index, WC= waist circumference, WHtR= waist to height ratio, BP =blood pressure, MET=Metabolic equivalent of task*

4 *<sup>a</sup>Age was adjusted for sex and father's education*

5 *<sup>b</sup>Sex was for adjusted for age and father's education*

6

7

8

9

10

11

12

13

14

15

16

17

18

19

20

21

22

1 Table 3: Stepwise linear regression analysis showing the aggregate correlates of BP z-score in  
 2 South Asian children

| Stepwise multiple linear regression models |                        |        |                |         |                         |
|--------------------------------------------|------------------------|--------|----------------|---------|-------------------------|
|                                            | Variable               | B      | 95%            | P value | Adjusted R <sup>2</sup> |
| Systolic BP z-score                        | Child's age            | -0.132 | -0.202, -0.062 | <0.001  | 0.294                   |
|                                            | Sex                    | -0.293 | -0.461, -0.126 | 0.001   |                         |
|                                            | BMI z-score            | 0.125  | 0.022, 0.228   | 0.017   |                         |
|                                            | Heart rate             | 0.014  | 0.007, 0.021   | <0.001  |                         |
|                                            | Weight                 | 0.027  | 0.012, 0.041   | <0.001  |                         |
| Diastolic BP z-score                       | Child's age            | -0.027 | -0.048, -0.007 | 0.01    | 0.228                   |
|                                            | BMI z-score            | 0.125  | 0.081, 0.170   | <0.001  |                         |
|                                            | Heart rate             | 0.015  | 0.010, 0.021   | <0.001  |                         |
|                                            | Daily fast food intake | -0.013 | -0.028, 0.001  | 0.072   |                         |

3 *BMI=body mass index, BP= blood pressure*

4  
5



1  
2  
3 1 Figure 1: Adjusted odds ratio for the association between the multifactorial variables with  
4 2 systolic hypertension  
5  
6  
7 3  
8 4  
9 5  
10 6  
11 7  
12 8  
13 9  
14 10  
15 11  
16 12  
17 13  
18 14  
19 15  
20 16  
21 17  
22 18  
23 19  
24 20  
25 21  
26 22  
27 23  
28 24  
29 25  
30  
31  
32  
33  
34  
35  
36  
37  
38  
39  
40  
41  
42  
43  
44  
45  
46  
47  
48  
49  
50  
51  
52  
53  
54  
55  
56  
57  
58  
59  
60

For peer review only

1  
2  
3  
4  
5  
6  
7  
8  
9  
10  
11  
12  
13  
14  
15  
16  
17  
18  
19  
20  
21  
22  
23  
24  
25  
26  
27  
28  
29  
30  
31  
32  
33  
34  
35  
36  
37  
38  
39  
40  
41  
42  
43  
44  
45  
46  
47  
48  
49  
50  
51  
52  
53  
54  
55  
56  
57  
58  
59  
60

1 Figure 2: Adjusted odds ratio for the association between the multifactorial variables with  
2 diastolic hypertension

For peer review only



Model adjusted for age, sex and father's education

Values presented are odds ratio (95% confidence intervals)

BMI= body mass index, WC= waist circumference, WHtR= waist to height ratio, BP =blood pressure

\*compared to males

1  
2  
3  
4  
5  
6  
7  
8  
9  
10  
11  
12  
13  
14  
15  
16  
17  
18  
19  
20  
21  
22  
23  
24  
25  
26  
27  
28  
29  
30  
31  
32  
33  
34  
35  
36  
37  
38  
39  
40  
41  
42  
43  
44  
45  
46  
47  
48  
49  
50  
51  
52  
53  
54  
55  
56  
57  
58  
59  
60

For peer review only



*Model adjusted for age, sex and father's education*

*Values presented are odds ratio (95% confidence intervals)*

*BMI= body mass index, WC= waist circumference, WHtR= waist to height ratio, BP =blood pressure*

STROBE Statement—Checklist of items that should be included in reports of *cross-sectional studies*

|                              | Item No                                                                            | Recommendation                                                                                                                                                                                               | Page No |
|------------------------------|------------------------------------------------------------------------------------|--------------------------------------------------------------------------------------------------------------------------------------------------------------------------------------------------------------|---------|
| <b>Title and abstract</b>    | 1                                                                                  | (a) Indicate the study's design with a commonly used term in the title or the abstract                                                                                                                       | 1-2     |
|                              |                                                                                    | (b) Provide in the abstract an informative and balanced summary of what was done and what was found                                                                                                          | 2       |
| <b>Introduction</b>          |                                                                                    |                                                                                                                                                                                                              |         |
| Background/rationale         | 2                                                                                  | Explain the scientific background and rationale for the investigation being reported                                                                                                                         | 3       |
| Objectives                   | 3                                                                                  | State specific objectives, including any prespecified hypotheses                                                                                                                                             | 3-4     |
| <b>Methods</b>               |                                                                                    |                                                                                                                                                                                                              |         |
| Study design                 | 4                                                                                  | Present key elements of study design early in the paper                                                                                                                                                      | 4       |
| Setting                      | 5                                                                                  | Describe the setting, locations, and relevant dates, including periods of recruitment, exposure, follow-up, and data collection                                                                              | 4       |
| Participants                 | 6                                                                                  | (a) Give the eligibility criteria, and the sources and methods of selection of participants                                                                                                                  | 4       |
| Variables                    | 7                                                                                  | Clearly define all outcomes, exposures, predictors, potential confounders, and effect modifiers. Give diagnostic criteria, if applicable                                                                     | 5-8     |
| Data sources/<br>measurement | 8*                                                                                 | For each variable of interest, give sources of data and details of methods of assessment (measurement). Describe comparability of assessment methods if there is more than one group                         | 5-8     |
| Bias                         | 9                                                                                  | Describe any efforts to address potential sources of bias                                                                                                                                                    | 5       |
| Study size                   | 10                                                                                 | Explain how the study size was arrived at                                                                                                                                                                    |         |
| Quantitative variables       | 11                                                                                 | Explain how quantitative variables were handled in the analyses. If applicable, describe which groupings were chosen and why                                                                                 | 8       |
| Statistical methods          | 12                                                                                 | (a) Describe all statistical methods, including those used to control for confounding                                                                                                                        | 8-9     |
|                              |                                                                                    | (b) Describe any methods used to examine subgroups and interactions                                                                                                                                          | N/A     |
|                              | (c) Explain how missing data were addressed                                        | 7                                                                                                                                                                                                            |         |
|                              | (d) If applicable, describe analytical methods taking account of sampling strategy | N/A                                                                                                                                                                                                          |         |
|                              | (e) Describe any sensitivity analyses                                              | N/A                                                                                                                                                                                                          |         |
| <b>Results</b>               |                                                                                    |                                                                                                                                                                                                              |         |
| Participants                 | 13*                                                                                | (a) Report numbers of individuals at each stage of study—eg numbers potentially eligible, examined for eligibility, confirmed eligible, included in the study, completing follow-up, and analysed            | 9       |
|                              |                                                                                    | (b) Give reasons for non-participation at each stage                                                                                                                                                         | N/A     |
|                              |                                                                                    | (c) Consider use of a flow diagram                                                                                                                                                                           | N/A     |
| Descriptive data             | 14*                                                                                | (a) Give characteristics of study participants (eg demographic, clinical, social) and information on exposures and potential confounders                                                                     | 9       |
|                              |                                                                                    | (b) Indicate number of participants with missing data for each variable of interest                                                                                                                          | 24      |
| Outcome data                 | 15*                                                                                | Report numbers of outcome events or summary measures                                                                                                                                                         | 9       |
| Main results                 | 16                                                                                 | (a) Give unadjusted estimates and, if applicable, confounder-adjusted estimates and their precision (eg, 95% confidence interval). Make clear which confounders were adjusted for and why they were included | 8-11    |

|                          |    |                                                                                                                                                                            |     |
|--------------------------|----|----------------------------------------------------------------------------------------------------------------------------------------------------------------------------|-----|
|                          |    | (b) Report category boundaries when continuous variables were categorized                                                                                                  | N/A |
|                          |    | (c) If relevant, consider translating estimates of relative risk into absolute risk for a meaningful time period                                                           | N/A |
| Other analyses           | 17 | Report other analyses done—eg analyses of subgroups and interactions, and sensitivity analyses                                                                             | N/A |
| <b>Discussion</b>        |    |                                                                                                                                                                            |     |
| Key results              | 18 | Summarise key results with reference to study objectives                                                                                                                   | 12  |
| Limitations              | 19 | Discuss limitations of the study, taking into account sources of potential bias or imprecision. Discuss both direction and magnitude of any potential bias                 | 16  |
| Interpretation           | 20 | Give a cautious overall interpretation of results considering objectives, limitations, multiplicity of analyses, results from similar studies, and other relevant evidence | 17  |
| Generalisability         | 21 | Discuss the generalisability (external validity) of the study results                                                                                                      | 16  |
| <b>Other information</b> |    |                                                                                                                                                                            |     |
| Funding                  | 22 | Give the source of funding and the role of the funders for the present study and, if applicable, for the original study on which the present article is based              | 18  |

\*Give information separately for exposed and unexposed groups.

**Note:** An Explanation and Elaboration article discusses each checklist item and gives methodological background and published examples of transparent reporting. The STROBE checklist is best used in conjunction with this article (freely available on the Web sites of PLoS Medicine at <http://www.plosmedicine.org/>, Annals of Internal Medicine at <http://www.annals.org/>, and Epidemiology at <http://www.epidem.com/>). Information on the STROBE Initiative is available at [www.strobe-statement.org](http://www.strobe-statement.org).

# BMJ Open

## Multifactorial correlates of blood pressure in South Asian children in Canada: a cross-sectional study

|                                 |                                                                                                                                                                                                                                                                                                                                                                                                                                                                                                                                                                                                                                                                                                                                              |
|---------------------------------|----------------------------------------------------------------------------------------------------------------------------------------------------------------------------------------------------------------------------------------------------------------------------------------------------------------------------------------------------------------------------------------------------------------------------------------------------------------------------------------------------------------------------------------------------------------------------------------------------------------------------------------------------------------------------------------------------------------------------------------------|
| Journal:                        | <i>BMJ Open</i>                                                                                                                                                                                                                                                                                                                                                                                                                                                                                                                                                                                                                                                                                                                              |
| Manuscript ID                   | bmjopen-2018-027844.R2                                                                                                                                                                                                                                                                                                                                                                                                                                                                                                                                                                                                                                                                                                                       |
| Article Type:                   | Research                                                                                                                                                                                                                                                                                                                                                                                                                                                                                                                                                                                                                                                                                                                                     |
| Date Submitted by the Author:   | 20-Feb-2019                                                                                                                                                                                                                                                                                                                                                                                                                                                                                                                                                                                                                                                                                                                                  |
| Complete List of Authors:       | Fowokan, Adeleke; Simon Fraser University, Department of Biomedical Physiology and Kinesiology<br>Punthakee, Zubin; McMaster University, Medicine<br>Waddell, Charlotte; Simon Fraser University, Faculty of Health Sciences<br>Rosin, Miriam; Simon Fraser University, Department of Biomedical Physiology and Kinesiology<br>Morrison, Katherine; McMaster University Department of Medicine<br>Gupta, Milan; McMaster University Department of Medicine<br>Rangarajan, Sumathy; Population Health Research Institute, Hamilton Health Sciences/McMaster University,<br>Teo, Koon; Population Health Research Institute, Hamilton Health Sciences/McMaster University,<br>Lear, Scott; Simon Fraser University, Faculty of Health Sciences |
| <b>Primary Subject Heading</b>: | Epidemiology                                                                                                                                                                                                                                                                                                                                                                                                                                                                                                                                                                                                                                                                                                                                 |
| Secondary Subject Heading:      | Paediatrics, Public health                                                                                                                                                                                                                                                                                                                                                                                                                                                                                                                                                                                                                                                                                                                   |
| Keywords:                       | Hypertension < CARDIOLOGY, PAEDIATRICS, EPIDEMIOLOGY                                                                                                                                                                                                                                                                                                                                                                                                                                                                                                                                                                                                                                                                                         |
|                                 |                                                                                                                                                                                                                                                                                                                                                                                                                                                                                                                                                                                                                                                                                                                                              |

SCHOLARONE™  
Manuscripts



1  
2  
3 **1 Multifactorial correlates of blood pressure in South Asian children in Canada: a cross-**  
4 **2 sectional study.**

6  
7 3 Fowokan AO, MPH<sup>1</sup>, Punthakee Z, MD<sup>2</sup>, Waddell C, MD<sup>5</sup>, Rosin M, PhD<sup>1</sup>, Morrison K, MD<sup>2</sup>,  
8 4 Gupta M, MD<sup>2,3</sup>, Rangarajan S, MSc<sup>4</sup>, Teo K, MD<sup>2</sup>, Lear SA, PhD<sup>1, 5, 6</sup>

9  
10 5 <sup>1</sup>Department of Biomedical Physiology and Kinesiology, Simon Fraser University, Burnaby, BC,  
11 6 Canada, V5A 1S6

12  
13 7 <sup>2</sup>Department of Medicine, McMaster University and Population Health Research Institute,  
14 8 Hamilton, Ontario, Canada, L8S 4K1

15  
16 9 <sup>3</sup>Canadian Collaborative Research Network, Brampton, ON, Canada, L6Z 4N5

17  
18 10 <sup>4</sup>Population Health Research Institute, Hamilton, ON, Canada, L8L 2X2

19  
20 11 <sup>5</sup>Faculty of Health Sciences, Simon Fraser University, Burnaby, BC, Canada, V5A 1S6

21  
22 12 <sup>6</sup>Division of Cardiology, Providence Health Care, Vancouver, BC, Canada, V6Z 1Y6

23  
24 13 **Running title: Correlates of blood pressure in South Asian children**

25  
26 14

27  
28 15 **Keywords:** South Asian, children, hypertension, risk factors

29  
30 16

31  
32 17 **Corresponding Author:** Adeleke Fowokan, MPH

33  
34 18 Healthy Heart Program, St. Paul's Hospital

35  
36 19 180-1081 Burrard St.

37  
38 20 Vancouver, BC

39  
40 21 Canada

41  
42 22 V6Z 1Y6

43  
44 23 E-mail: [afowokan@sfu.ca](mailto:afowokan@sfu.ca)

45  
46 24 Word count: 4402 words

## 1 ABSTRACT

2 **Objective:** We sought to explore various correlates of BP and hypertension, and to identify the  
3 most important aggregate combination of correlates for BP in South Asian children.

4 **Design:** Cross-sectional study

5 **Setting:** Community-based recruitment in two Canadian cities

6 **Participants:** South Asian children (n=762) provided a range of physiological, lifestyle and  
7 social variables. BP was assessed using an automated device. Body mass index (BMI), waist  
8 circumference (WC), waist-to-height ratio (WHtR) and BP were transformed to z-scores using  
9 published standards.

10 **Outcome measures:** Linear and logistic regression analyses were used to explore associations  
11 between the range of variables with BP z-scores and hypertension while stepwise regression was  
12 used to identify aggregate factors that provided explanatory capacity for systolic BP (SBP) and  
13 diastolic BP (DBP) z-scores.

14 **Results:** A range of variables were associated with BP z-score and hypertension in unadjusted  
15 analysis. Upon adjustment for confounders, the association between age ( $\beta = -0.054$ , 95% CI -  
16 0.078, 0.029, female sex ( $\beta = -0.208$ , 95% CI= -0.350, -0.067), height ( $\beta = 0.022$ , 95% CI= 0.011,  
17 0.033), weight ( $\beta = 0.047$ , 95% CI= 0.040, 0.055) BMI z-score ( $\beta = 0.292$ , 95% CI 0.249, 0.336),  
18 WC z-score ( $\beta = 0.273$ , 95% CI= 0.219, 0.326), WHtR z-score ( $\beta = 0.289$ , 95% CI= 0.236,  
19 0.342), heart rate ( $\beta = 0.016$ , 95% CI= 0.010, 0.022), child's perception of body image ( $\beta = 0.183$ ,  
20 95% CI= 0.128, 0.239) and grip strength ( $\beta = 0.025$ , 95% CI= 0.007, 0.043) with SBP z-score  
21 remained. In stepwise regression, age, sex, BMI z-score, heart rate and weight accounted for

1  
2  
3 1 30% of the variance of SBP z-score, while age, BMI z-score, heart rate and daily fast food intake  
4  
5 2 accounted for 23% of the DBP z-score variance.  
6  
7

8 3 **Conclusion:** Our findings suggest that variables such as age, sex, height, adiposity, and heart rate  
9  
10 4 provide stronger explanatory capacity to BP variance and hypertension risk than other variables  
11  
12  
13 5 in South Asian children.  
14  
15  
16  
17  
18  
19  
20  
21  
22  
23  
24  
25  
26  
27  
28  
29  
30  
31  
32  
33  
34  
35  
36  
37  
38  
39  
40  
41  
42  
43  
44  
45  
46  
47  
48  
49  
50  
51  
52  
53  
54  
55  
56  
57  
58  
59  
60

For peer review only

1  
2  
3 **1 ARTICLE SUMMARY**  
4  
5

6 **2 Strengths and limitations of this study**  
7

- 8  
9 • The strengths of this study includes its large sample size of South Asian children and,  
10  
11 • Its examination of a wide range of physiological, lifestyle and social risk factors in  
12  
13 relation to BP z-scores and hypertension in South Asian children.  
14  
15 • Limitations of the study includes its cross-sectional design which limits the attribution of  
16  
17 causality.  
18  
19  
20  
21  
22  
23  
24  
25  
26  
27  
28  
29  
30  
31  
32  
33  
34  
35  
36  
37  
38  
39  
40  
41  
42  
43  
44  
45  
46  
47  
48  
49  
50  
51  
52  
53  
54  
55  
56  
57  
58  
59  
60

## 1 INTRODUCTION

2 South Asians comprise approximately 25% of the world's global population<sup>1</sup> and  
3 represent a significant portion of the visible ethnic minority groups in countries such as Canada,  
4 the United Kingdom and the United States (US)<sup>2-4</sup>. Individuals of South Asian origin are known  
5 to be at increased risk of cardiovascular disease (CVD) relative to other ethnic groups in Western  
6 countries<sup>5,6</sup>. These differences in CVD risk have also been shown to be present in South Asian  
7 children, suggesting that the risk differential in CVD risk factors and events experienced by this  
8 ethnic group starts from an early age<sup>7</sup>.

9 One of the major physiological risk factors for CVDs is high blood pressure (BP) or  
10 hypertension<sup>8</sup>. Hypertension is also associated with an increased risk for stroke and kidney  
11 disease<sup>8</sup>. Moreover, multiple studies have shown that high BP in childhood typically continues  
12 into adulthood<sup>9</sup> — including in South Asian populations<sup>10</sup>. These findings suggest that it is  
13 important to prevent hypertension in childhood in order to address the potential cardiovascular  
14 and metabolic sequelae later in life.

15 In South Asian children, studies have demonstrated increased prevalence of hypertension  
16 or higher BP levels relative to other ethnic groups<sup>11,12</sup>. While there is evidence suggesting a  
17 disproportionately higher BP burden for South Asians, the exact factors implicated are relatively  
18 unclear. Given the fact that causes of high BP are known to be multifactorial<sup>8</sup>, it is important to  
19 understand the various risk factors that might be responsible for the increased risk of high BP in  
20 South Asian children in general. Using a range of multifactorial variables (i.e. variables across a  
21 range of different factors) that were identified in a recently published systematic review of  
22 children to be correlated with BP and hypertension in other children population groups<sup>13</sup>, this  
23 study therefore aims: 1) to explore the associations between physiological (factors relating to

1 biology), lifestyle (factors relating to behaviour) and social factors (factors relating to conditions  
2 in which people live, attend school, grow, and develop) and BP in South Asian children; and 2)  
3 to identify the most important aggregate correlates of BP in South Asian children.

## 4 **METHODS**

### 5 **Study Design**

6 Participants included in this study were recruited as part of the Research in International  
7 Cardiovascular Health - Lifestyles, Environments and Genetic Attributes in Children and Youth  
8 (RICH-LEGACY) study. This cross-sectional study is designed to investigate risk factors for  
9 CVD across South Asian children in Canada. The study was approved by the Simon Fraser  
10 University Research Ethics Board (REB), Providence Health Care REB, and the Hamilton  
11 Integrated REB. Parents of participants provided written informed consent, while participants  
12 assented to take part in the study.

### 13 **Recruitment**

14 Elementary school and high-school children (n= 762) were recruited using community-  
15 based methods in two Canadian cities (Brampton, Ontario and Surrey, British Columbia) by  
16 convenience sampling between 2012 and 2016. Letters were first sent to school boards to  
17 identify elementary schools with a high rate of South Asian enrolment. Once schools were  
18 identified, packages containing an invitation letter, a RICH-LEGACY study description and  
19 consent forms were sent to parents/guardians of children enrolled in the identified schools.  
20 Information stands were also placed at the participating elementary schools before and after  
21 school hours to reach out to parents with more information about the study. Additionally, the  
22 study was advertised through venues used by South Asian groups including newspapers, local

1 television stations, community centres, worship centres and festivals. Inclusion criteria included:  
2 children (in elementary or high school) having at least three grandparents of South Asian origin;  
3 and participants being able to provide consent (parents) and assent (children). Research assistants  
4 fluent in Hindi and Punjabi were responsible for participant recruitment and data collection. The  
5 research assistants who were involved in the measurements all undertook training together  
6 through simulator sessions and were retrained if variations in measurement protocol were  
7 observed by the research coordinator. This process was repeated for a few days to ensure  
8 accuracy and consistency amongst the research assistants in the assessment of the measurements  
9 collected in this study. In addition, written materials (including consent forms) were provided in  
10 English, Punjabi, Hindi and Urdu as needed.

### 11 **Participant Assessment**

12 Participants for the RICH-LEGACY study were assessed regarding socio-demographic  
13 variables including age, sex and parental education. In certain cases, parents or guardians helped  
14 complete certain sections of the child's questionnaire. Children's perception of body image was  
15 assessed using Stunkard's silhouettes, a rating scale from one to nine with increases related to  
16 increased silhouette size<sup>14</sup>, that assesses perception of size and body dissatisfaction. This figure  
17 rating scale has been shown to be a valid indicator of determining weight status in children<sup>15</sup>.  
18 Feeding practices were assessed using the childhood feeding questionnaire<sup>16</sup>. Exposure to  
19 bullying was assessed by asking participants if they had experienced bullying or violence at  
20 school. This variable was assessed because of its role as a known stressor in children and its  
21 possible impact on pathways known to be involved in BP regulation such as the hypothalamic-  
22 pituitary-adrenal (HPA) axis<sup>17</sup>. Additionally, level of acculturation was assessed using the  
23 Acculturation Rating Scale for Mexican Americans-II (ARSMA- II) adapted for use in South

1  
2  
3 1 Asians by Stigler *et al*<sup>18</sup>. This scale assesses an individual's identification with their heritage  
4  
5 2 based on different domains including language preferences, media preferences, and preferences  
6  
7 3 regarding food and other consumer goods using 24 questions<sup>18</sup>. The adapted questionnaire is  
8  
9 4 grouped into two scales: the Western scale and the traditional scale. The traditional acculturation  
10  
11 5 score measures children's acceptance of traditional Indian cultural attributes while the  
12  
13 6 Westernized acculturation score measures the degree to which South Asian children identify with  
14  
15 7 Western culture.  
16  
17  
18  
19

20 8 Participants completed a semi-quantitative food frequency questionnaire (FFQ) that  
21  
22 9 assessed intake of fruits and vegetables and fast foods consumption. The FFQ was adapted from  
23  
24 10 the INTERHEART FFQ, which was validated in an international cohort that included South  
25  
26 11 Asians<sup>19</sup>. Physical activity was assessed using a standardized questionnaire that quantified sports  
27  
28 12 and other activities including leisure, household chores and sedentary factors (screen time and  
29  
30 13 homework) during school and outside of school over the past month. All activities were then  
31  
32 14 expressed as metabolic-equivalent-of-task (MET) minutes. Self-reported exposure to second-  
33  
34 15 hand smoke was assessed to characterize children's passive exposure to smoking and defined as  
35  
36 16 a minimum of five consecutive minutes during which inhalation of other people's smoke occurs.  
37  
38 17 Hand-grip strength, a measure of muscular strength, was measured on the non-dominant hand by  
39  
40 18 study personnel with a Jamar dynamometer utilizing standardized protocol<sup>20</sup>.  
41  
42  
43  
44  
45

### 46 19 **Anthropometric Characteristics**

47  
48 20 Height was measured to the nearest 0.1 cm using a right angle triangle and a calibrated  
49  
50 21 wall mounted scale. Weight was measured to the nearest 0.1 kg with the subject in light clothing  
51  
52 22 using an electronic scale. Body mass index (BMI) was first calculated from weight in kilograms  
53  
54  
55  
56  
57  
58  
59  
60



1 divided by height in meters squared before being converted to z-scores using WHO growth  
2  
3  
4  
5  
6  
7  
8  
9  
10  
11  
12  
13  
14  
15  
16  
17  
18  
19  
20  
21  
22  
23  
24  
25  
26  
27  
28  
29  
30  
31  
32  
33  
34  
35  
36  
37  
38  
39  
40  
41  
42  
43  
44  
45  
46  
47  
48  
49  
50  
51  
52  
53  
54  
55  
56  
57  
58  
59  
60

1 divided by height in meters squared before being converted to z-scores using WHO growth  
2 references for young people aged 5-19 years<sup>21</sup>.

3           Waist circumference (WC) was recorded in centimetres as the average of two measures  
4 taken halfway between the lower rib margin and the iliac crest against the skin following a  
5 normal expiration. Waist circumference was assessed using non-stretching measuring tape by  
6 trained team members. Waist-to-height ratio (WtHR) was then calculated by dividing waist  
7 circumference by height. Both WC and WtHR were transformed to z scores using published  
8 lambda-mu-sigma (LMS) values for age and sex based on the third US National Health and  
9 Nutrition Examination Survey (NHANES III)<sup>22</sup>. Transforming the anthropometric measures to z-  
10 scores allowed for the standardized comparisons across populations of children of similar ages  
11 and sex.

## 12 **Blood Pressure and Heart Rate**

13           Blood pressure and heart rate were measured in the left arm using the Omron HEM-  
14 711DLX automated blood pressure monitor with appropriate sized cuffs following 10 minutes of  
15 seated rest. Three BP and heart rate measures were taken over a 10-minute period and the  
16 average of the three was recorded. Subsequently, BP was transformed to standard deviation  
17 scores and percentiles adjusted for age, sex and height according to the fourth National High  
18 Blood Pressure Education Program (NHBPEP) working group in children and adolescents<sup>23</sup>.  
19 Systolic and diastolic hypertension were defined using the NHBPEP recommendations as  
20 average systolic blood pressure or diastolic blood pressure equal to or greater than the 95<sup>th</sup>  
21 percentile for sex, age and height.

## 22 **Parental Variables**

1  
2  
3 1 Parents of the children recruited for this study provided information on parental education  
4  
5 2 (father's and mother's education). In a smaller subset of the South Asian children (n=271),  
6  
7 3 parental history of hypertension (yes or no) was assessed in order to explore the potential impact  
8  
9 4 of heritable factors on children's BP z-scores and hypertension. Father's education was used as a  
10  
11 5 proxy variable for socioeconomic status in this study. Fathers' education levels were categorized  
12  
13 6 as: those with no formal education; those with primary/secondary school education; those with a  
14  
15 7 trade school degree/diploma; and those with a college or university degree. Parent's smoking  
16  
17 8 status was self-reported and categorized as non-smoker, former smoker, or current smoker.  
18  
19  
20  
21

## 22 9 **Statistical Analysis**

23  
24  
25 10 All continuous variables were examined using P-P plots and found to be normally  
26  
27 11 distributed. For descriptive analysis, continuous variables were presented as means and standard  
28  
29 12 deviations while categorical variables were reported as counts and percentages. Independent t-  
30  
31 13 test analysis was used to assess sex differences in continuous variables, while chi-square tests  
32  
33 14 were used to assess sex differences in categorical variables.  
34  
35  
36  
37

38 15 To explore the associations among the range of physiological, lifestyle and social  
39  
40 16 variables with systolic and diastolic BP, unadjusted linear regression was used. These models  
41  
42 17 were then adjusted for potential confounding effect of child age, sex and father's education.  
43  
44 18 These confounders were selected based on their well –documented independent associations with  
45  
46 19 the outcome variable in research studies<sup>11,13</sup>. Although, the conversion of to z-scores provides  
47  
48 20 age and sex adjusted data, we chose to still include age and sex as confounders to adjust for  
49  
50 21 potential residual effects unaccounted for by the reference charts used in this study. Similarly,  
51  
52 22 unadjusted and adjusted (age, sex and father's education) logistic regression analysis was used to  
53  
54  
55  
56  
57  
58  
59  
60

1 explore clinically-relevant associations among the multifactorial variables with systolic and  
2 diastolic hypertension. While age and sex were identified as potential confounders in the  
3 association between the other variables assessed in this study with BP and hypertension, we also  
4 wanted to examine their independent associations with BP and hypertension. To do this, they  
5 were each removed from the list of confounders we adjusted for when exploring their effect on  
6 BP z-scores and hypertension (i.e., sex was adjusted for age and father's education, while age  
7 was adjusted for sex and father's education.)

8 To address the second study objective, stepwise multiple linear regression analyses were  
9 used to identify the combination of risk factors that best explained the variance in BP in South  
10 Asian children. The stepwise regression method enables the identification of the aggregate  
11 combination of correlates that has the highest contributory effect to the outcome variable.  
12 Specifically, for this analysis, we utilized the backward method to select the list of multifactorial  
13 correlates that provide significant contribution to the outcome (systolic and diastolic BP z-  
14 scores) using an entry criterion of  $p < 0.05$  and a removal criterion of  $p > 0.10$ . The specific list of  
15 correlates (age, sex, height, weight, heart rate, BMI z-score, WC z-score, WHtR z-score, parental  
16 history of hypertension, parental education, exposure to bullying and violence, traditional and  
17 western acculturation scores, physical activity in school and outside school, dietary variables and  
18 second-hand smoking) considered for introduction in the backward stepwise regression model  
19 were chosen *a priori* based on literature evidence<sup>13</sup> and whether they had a p value  $< 0.05$  in  
20 unadjusted analysis. Using the aforementioned criteria, the following variables were considered  
21 in step-wise regression analysis: age, sex, height, weight, BMI z-score, WC z-score, WHtR z-  
22 score, heart rate, western acculturation score, child's perception of body image, and grip  
23 strength. In addition to these variables, father's education, daily intake of fast foods and total

1  
2  
3 1 daily intake were considered in diastolic BP z-score models. The adjusted R squared value for  
4  
5 2 each model provides the combined contribution of the variables in the model to the variance in  
6  
7 3 BP z-scores. The full list of variables initially identified from literature search were also  
8  
9 4 considered in logistic regression models with hypertension. Statistical analysis was done using  
10  
11 5 SPSS version 24.0. P values <0.05 were considered statistically significant. This study was  
12  
13 6 written in line with the Strengthening the Reporting of Observational studies in Epidemiology  
14  
15 7 (STROBE) guidelines<sup>24</sup>

## 8 **Patient and Public Involvement**

9 The research questions and outcome measures in this study were chosen by this team of  
10  
11 researchers and clinicians with extensive experience working with the South Asian population to  
12  
13 better understand the potential health risks faced by South Asian children. No patients were  
14  
15 involved in setting the research question in development of the research question or study design.  
16  
17 There are currently no plans to disseminate the results of this research study to study participants  
18  
19 or to the relevant patient population.

## 15 **RESULTS**

16 This study included 360 boys (47%) and 402 girls ranging from 5.8 to 17.0 years (mean  
17  
18 age  $9.5 \pm 3.0$  years), with no statistically significant difference observed for age by sex (table 1).  
19  
20 The prevalence of systolic hypertension in this population was 12%. South Asian boys were  
21  
22 more physically active outside school than girls ( $p=0.04$ ); higher WC z-score ( $p<0.001$ ); higher  
23  
24 WHtR z-score ( $p=0.02$ ); lower heart rate ( $p=0.047$ ); higher systolic BP z-scores ( $p=0.001$ );  
25  
26 higher prevalence of systolic hypertension ( $p=0.01$ ); had lower traditional acculturation score  
27  
28 ( $p=0.02$ ); and significantly higher exposure to bullying and violence at school ( $p=0.025$ ).

## 1 Correlates of Systolic BP and Systolic Hypertension

2 In unadjusted linear regression analysis with systolic BP z-scores, weight (kg) ( $\beta = 0.005$ ,  
3 95% CI= 0.001, 0.01,  $p=0.022$ ), BMI z-score ( $\beta = 0.289$ , 95% CI= 0.246, 0.333,  $p<0.001$ ), WC z-  
4 score ( $\beta = 0.266$ , 95% CI= 0.213, 0.319,  $p<0.001$ ), WHtR z-score ( $\beta = 0.271$ , 95% CI= 0.219,  
5 0.324,  $p<0.001$ ), heart rate (beats per minute) ( $\beta = 0.019$ , 95% CI= 0.015, 0.023,  $p<0.001$ ), and  
6 the child's perception of their body image (using Stunkard's silhouettes) ( $\beta = 0.136$ , 95% CI=  
7 0.083, 0.189,  $p<0.001$ ) were found to be positively associated with systolic BP z-score. In  
8 contrast, we found that compared to male sex, female sex had lower systolic BP z-score ( $\beta = -$   
9 0.246, 95% CI= -0.385, -0.108,  $p<0.001$ ). Similarly, age (years) ( $\beta = -0.060$ , 95% CI= -0.084, -  
10 0.037,  $p<0.001$ ), children's western acculturation score ( $\beta = -0.021$ , 95% CI= -0.036, -0.006,  
11  $p=0.007$ ) and height (cm) ( $\beta = -0.006$ , 95% CI= -0.010, -0.002,  $p=0.007$ ) were negatively  
12 associated with systolic BP z-score. After adjustment for confounders, the association between  
13 western acculturation attenuated and became non-significant, while the association observed  
14 between height and systolic BP z-score became positive. Associations between children's grip  
15 strength and daily physical activity in school with systolic BP z-score also became significant  
16 upon adjustment (table 2).

17 In stepwise regression analysis, the combination of age, sex, BMI z-score, heart rate and  
18 weight were observed to be the most important correlates of systolic BP z-score, accounting for  
19 30% of the systolic BP z-score variance of South Asian children (Table 3).

20 In unadjusted logistic regression analysis, female sex was associated with lower odds of  
21 developing systolic hypertension (odds ratio (OR) = 0.56, 95% CI= 0.36, 0.87,  $p=0.011$ ).

22 Associations were also observed with weight (kg) and systolic hypertension (OR= 1.02, 95%

1 CI= 1.01, 1.04,  $p<0.001$ ), BMI z-score and systolic hypertension (OR= 2.22, 95% CI= 1.84,  
2 2.68,  $p<0.001$ ), WC z-score and systolic hypertension (OR= 2.65, 95% CI= 2.06, 3.43,  $p<0.001$ )  
3 and WHtR z-score and systolic hypertension (OR= 2.47, 95% CI= 1.95, 3.13,  $p<0.001$ ).  
4 Similarly, associations were observed between heart rate (beats per minute) and systolic  
5 hypertension (OR=1.04, 95% CI= 1.02, 1.06,  $p<0.001$ ), child's perception of body image and  
6 systolic hypertension (OR= 1.50, 95% CI= 1.25, 1.79,  $p<0.001$ ) and western acculturation score  
7 with systolic hypertension (OR= 0.95, 95% CI=0.90, 1.00,  $p=0.03$ ). Upon adjustment for  
8 confounders, the associations between western acculturation score and systolic hypertension  
9 attenuated and became non-significant. The association between grip strength and systolic  
10 hypertension became significant upon adjustment (Figure 1).

### 11 **Correlates of Diastolic BP and Diastolic Hypertension**

12 In unadjusted linear regression analysis of multifactorial variables with diastolic BP z-  
13 score, negative associations with diastolic BP z-score were observed between age (years) ( $\beta= -$   
14 0.061,  $p<0.001$ ), height (cm) ( $\beta= -0.009$ ,  $p<0.001$ ), western acculturation score ( $\beta= -0.018$ ,  
15  $p=0.007$ ), fathers' level of education ( $\beta= -0.054$ ,  $p=0.047$ ), total daily food intake ( $\beta= -0.016$ ,  
16  $p=0.005$ ), fast foods ( $\beta= -0.065$ ,  $p=0.048$ ) and grip strength (kg) ( $\beta= -0.019$ ,  $p<0.001$ ).  
17 Conversely, significant positive associations with diastolic BP z-score were observed between  
18 heart rate ( $\beta= 0.018$ ,  $p<0.001$ ), BMI z-score ( $\beta= 0.156$ ,  $p<0.001$ ), WC z-score ( $\beta= 0.120$ ,  
19  $p<0.001$ ), WHtR z-score ( $\beta= 0.128$ ,  $p<0.001$ ), and children's perception of their body image  
20 (using Stunkard's silhouettes) ( $\beta= 0.053$ ,  $p=0.007$ ). After adjustment for confounders the  
21 association between height, western acculturation score, father's level of education, total daily  
22 food intake, fast food consumption and grip strength attenuated and became non-significant  
23 (Table 2).

1  
2  
3 1 In stepwise regression analysis, the combination of age, BMI z-score, heart rate and daily  
4  
5 2 intake of fast foods were observed to be the most important aggregate correlates of diastolic BP  
6  
7 3 z-score, accounting for 23% of the diastolic BP z-score variance of South Asian children (Table  
8  
9 4 3).

10  
11  
12  
13 5 In unadjusted logistic regression analysis, associations were observed between age  
14  
15 6 (years) (OR= 0.71, 95% CI= 0.55, 0.92, p=0.01), height (OR= 0.97, 95% CI= 0.94, 1.00,  
16  
17 7 p=0.04), BMI z-score (OR= 1.68, 95% CI= 1.31, 2.17, p<0.001), WC z-score (OR= 1.89, 95%  
18  
19 8 CI= 1.32, 2.70, p=0.001), WHtR z-score (OR= 1.77, 95% CI= 1.26, 2.47, p=0.001), heart rate  
20  
21 9 (beats per minute) (OR=1.06, 95% CI= 1.03, 1.10, p<0.001) and grip strength (kg) (OR= 0.92,  
22  
23 10 95% CI= 0.86, 0.99, p=0.024) with diastolic hypertension. Upon adjustment for confounders, the  
24  
25 11 association between height, grip strength and diastolic hypertension attenuated and became non-  
26  
27 12 significant (Figure 2).

## 13 **DISCUSSION**

14  
15 14 This study provides information on a range of correlates of systolic and diastolic BP z-  
16  
17 15 scores in a population of South Asian children. While results from unadjusted models highlight  
18  
19 16 the presence of a multifactorial relationship for BP and hypertension, the disappearance of most  
20  
21 17 of the social and lifestyle risk factors upon adjustment highlights the contribution of variables  
22  
23 18 such as age, sex, adiposity, height, heart rate, and grip strength to the risk of elevated BP and  
24  
25 19 hypertension in South Asian children.

26  
27 20 It is well documented that the burden of hypertension has precipitously increased in the  
28  
29 21 pediatric population<sup>25</sup>. In addition, some studies have documented higher prevalence of  
30  
31 22 hypertension in certain ethnic groups such as South Asians<sup>11</sup>. Although our sample was based on

1  
2  
3 1 convenience and non-representative given that sampling was restricted to two Canadian cities,  
4  
5 2 the prevalence of hypertension in our study at 12% is consistent with age, sex and height  
6  
7 3 adjusted estimates from Jafar *et al*<sup>11</sup> using a nationally-representative survey of Pakistani  
8  
9 4 children age 5 to 14 years, but higher than 5.2% prevalence from one cross-sectional study of  
10  
11 5 Indian children ages 5 to 12 years<sup>26</sup>. Our estimates also appear higher than estimates from  
12  
13 6 Canadian children ages 6 to 19 years where 4% of children were said to have hypertension and  
14  
15 7 prehypertension<sup>27</sup>. When stratified by sex, we found significantly higher rates were observed for  
16  
17 8 boys at 15% compared to girls at 9%. This is consistent with results from studies in other  
18  
19 9 children which have reported higher hypertension prevalence in boys<sup>28,29</sup>, and results from  
20  
21 10 regression analysis which found female sex to be associated with lower odds of hypertension.  
22  
23 11 This risk differential has been attributed to the presence of an anti-inflammatory immune profile  
24  
25 12 in females and pro-inflammatory profile in males<sup>30</sup> — underscoring the potential for intervention  
26  
27 13 efforts aimed at addressing sex-based disparities.

28  
29  
30  
31  
32  
33  
34 14 Consistent with research conducted in South Asian children<sup>11,31</sup> and research conducted  
35  
36 15 in other childhood populations of different ethnicities<sup>28,32–36</sup>, we observed positive associations  
37  
38 16 between measures of adiposity and BP and hypertension after adjusting for covariates. The  
39  
40 17 consistency of the association observed across the range of adiposity metrics assessed  
41  
42 18 underscores the significant contribution of increasing adiposity to the prevalence of hypertension  
43  
44 19 in South Asian children. Moreover, the positive association between grip strength (a measure of  
45  
46 20 muscle strength) with systolic BP z-score and hypertension upon adjustment in this study raises  
47  
48 21 questions about the benefits of strength training in children. The benefits of physical activity  
49  
50 22 including aerobic exercise in relation to hypertension remain clear; however, the benefits of  
51  
52 23 strength training in relation to hypertension risk, relative to the benefits of aerobic exercise,  
53  
54  
55  
56  
57  
58  
59  
60



1  
2  
3 1 appear questionable<sup>37</sup>. It is unclear what might be responsible for the positive effect observed  
4  
5 2 between grip strength and systolic BP z-score; however, findings from our study appear  
6  
7 3 consistent with studies which have explored this association in Chinese<sup>38</sup> and American  
8  
9 4 children<sup>39</sup>.

10  
11  
12  
13 5 The consistent association between adiposity and hypertension, including the higher  
14  
15 6 prevalence of hypertension in this population, reinforces their connections through a range of  
16  
17 7 complex mechanistic pathways. Some of these pathways involve the activation of the renin-  
18  
19 8 angiotensin-aldosterone system (RAAS) or sympathetic nervous system. Specifically, the South  
20  
21 9 Asian phenotype of higher body fat<sup>7</sup>—especially the visceral type which has been identified in  
22  
23 10 adults<sup>6</sup>—when compared to their Caucasian peers, could activate the formation of pro-  
24  
25 11 inflammatory cytokines such as Interleukin 6 (IL-6) which results in physiological changes that  
26  
27 12 could lead to endothelial and vascular dysfunction through the development of insulin  
28  
29 13 resistance<sup>40</sup>, resulting in an increased predisposition for hypertension. The positive association  
30  
31 14 between height and BP in this population could be explained by cerebral perfusion requirements  
32  
33 15 where higher BP is needed in taller people to achieve optimal cerebral perfusion owing to  
34  
35 16 hydrostatic pressure differences in taller and shorter individuals<sup>41</sup>. However, more research in  
36  
37 17 South Asian children is warranted to corroborate our findings given the difference observed in  
38  
39 18 direction of association in unadjusted and adjusted models.  
40  
41  
42  
43  
44  
45

46 19 The positive association we found between the child's perception of body image and BP  
47  
48 20 may be due to this variable mirroring children's weight status or conversely, a marker for a  
49  
50 21 graded increase in stress levels, owing to societal criticism of fatter body types, which could  
51  
52 22 have insidious effects for hypertension risk through its impact on the neuro-endocrine system<sup>42</sup>.  
53  
54 23 Additionally, a range of social and lifestyle variables were also found to be associated with BP z-  
55  
56  
57  
58  
59  
60

1 score in unadjusted analysis but became non-significant upon adjustment for confounders. While  
2 results from unadjusted associations may demonstrate links between risk factor and outcome, the  
3 disappearance of the association upon adjustment for socio-demographic variables highlights the  
4 links between these variables and suggests that the pathway linking these factors with BP might  
5 be interdependent.

6 The stepwise regression model shows that correlates from this study explained only about  
7 30% of the variance of systolic BP z-score and 23% of the variability of diastolic BP z-scores. It  
8 is possible that some of this unexplained variance might be explained by genetics, as it has been  
9 suggested that about 30% to 60% of the variance in BP may be heritable<sup>43,44</sup>. Yet the lack of  
10 association between parental hypertension and child BP in the subset of parents of participants  
11 who provided this data would appear to contradict these findings for this population of South  
12 Asian children. However, it is likely that the subset of parents of child participants who provided  
13 this information might not be completely representative of the entire cohort, thereby biasing the  
14 results. Still, even accounting for potential genetic contributions, a significant amount of the BP  
15 variance remains unexplained. More research is needed to provide insight regarding the  
16 contributory effects of other potential variables that might contribute to risk of elevated BP in  
17 South Asian children.

18 Notably, null associations were also observed for certain variables in this study that have  
19 been found to be significantly associated with BP and hypertension in other child populations.  
20 For example, parental history of hypertension, dietary factors (such as consumption of fruit and  
21 vegetables) and exposure to second hand smoking have been linked in other studies to child BP  
22 but had no significant impact in this study. This could be reflective of the potential biases  
23 associated with using self-reports or may highlight how interactions between genes and

1  
2  
3 1 environment/lifestyle shape risk factor susceptibilities — underscoring the need for more ethnic-  
4  
5 2 based and ethnic comparison studies when exploring risk associations.  
6  
7

### 8 9 3 **Study Limitations**

10  
11 4 This study has limitations. First, although we sought to recruit a representative sample of  
12  
13 5 urban South Asian children, it was not a random sample. However, there is likely to be minimal  
14  
15 6 effect on the relationships between the ranges of risk factors evaluated in this study. Second, this  
16  
17 7 is a cross-sectional study and is therefore unable to provide insights into causal associations  
18  
19 8 between the risk factor variables and long term CVD risk in South Asian children. Third,  
20  
21 9 potential recall biases may have occurred as a result of using self-report data for some of the  
22  
23 10 variables including diet and physical activity measures. Fourth, the use of father's education as a  
24  
25 11 measure of socioeconomic status pose limitations. Variables like household income would have  
26  
27 12 been preferred, however only a subset of participants provided data on household income, thus  
28  
29 13 its use would have excluded a significant portion of children in this study. However, as a means  
30  
31 14 to confirm the results, we separately adjusted for mother's education and no deviation in study  
32  
33 15 results was observed. Last, the lack of data collection on sexual maturity status could potential  
34  
35 16 confound the study results obtained here. However, the adjustment for age in this study, which  
36  
37 17 acts as a proxy variable for sexual maturity might help mitigate the bias. These limitations are in  
38  
39 18 part addressed by strengths of this study which lies in its large sample size of South Asian  
40  
41 19 children and in the wide range of risk factors examined.  
42  
43  
44  
45  
46  
47  
48

### 49 20 **Implications**

50  
51  
52 21 Our findings underscore a range of factors that may contribute to risk of elevated BP and  
53  
54 22 hypertension in South Asian children. Consequently, public health interventions such as those  
55  
56  
57

1 that emphasize prevention such as population-based health education and lifestyle modification  
2 that considers unique cultural contexts may provide significant potential in addressing the burden  
3 of hypertension in this population. There are also implications for clinical settings. Specifically,  
4 our findings suggest that while South Asian children may benefit from interventions aimed at  
5 reducing obesity to address the comparatively higher burden of hypertension in this population,  
6 there are certain sub-groups who could benefit from more targeted preventive interventions in  
7 primary care settings — such as males, children with increased adiposity, taller children, and  
8 children with increased heart rate, or children with a combination of these factors.

## 9 CONCLUSION

10 In this group of South Asian children, we found associations between a range of  
11 physiological, social and lifestyle factors with BP z-scores and hypertension. However, upon  
12 adjustment for confounders, physiological variables such as age, sex, height, adiposity and heart  
13 rate remained consistently associated with BP and hypertension, and provided the strongest  
14 explanatory effect for the variance in BP. Given the sequelae associated with elevated BP,  
15 including BP tracking from childhood into adulthood, these results provide evidence on  
16 modifiable risk factors that might be targeted by prevention strategies in primary care to reduce  
17 the burden of high BP and hypertension in South Asian children.

18 **Author contributions:** Dr. Scott, Dr. Punthakee, Dr. Morrison, Dr. Gupta, Dr. Teo and Sumathy  
19 Rangarajan conceptualized the study, contributed to study design and reviewed the manuscript.  
20 Adeleke Fowokan conceptualized the study, drafted the initial manuscript, carried out statistical  
21 analysis and revised the manuscript. Dr. Waddell and Dr. Rosin contributed to the design of the  
22 study, reviewed and revised the manuscript.

23 All authors approved the final manuscript as submitted and agree to be accountable for all  
24 aspects of the work.

25 **Funding:** This study was funded by the Canadian Institutes of Health Research (FRN: 109206)

1  
2  
3 1 **Acknowledgements:** Dr. Lear is the Pfizer/Heart and Stroke Foundation Chair in Cardiovascular  
4 2 Prevention Research at St. Paul's Hospital. Research coordinators Pam Mackie, Michelle  
5 3 Tsigoulis, Veronica de Jong, Vaven Ghaat, Erica Corber and Amanpreet Thind were  
6 4 instrumental in completing the data collection for this project.

8  
9 5 **Competing interests:** None declared

10  
11 6 **Ethics Approval:** Simon Fraser University Research Ethics Board (REB), Providence Health  
12 7 Care REB, and the Hamilton Integrated REB

13  
14 8 **Data sharing statement:** Raw data are held by the lead author of the study in accordance with  
15 9 ethics guidelines.

16  
17 10  
18  
19  
20  
21  
22  
23  
24  
25  
26  
27  
28  
29  
30  
31  
32  
33  
34  
35  
36  
37  
38  
39  
40  
41  
42  
43  
44  
45  
46  
47  
48  
49  
50  
51  
52  
53  
54  
55  
56  
57  
58  
59  
60

For peer review only

## 1 References

- 2 1. Population Reference Bureau. 2017 World Population Data Sheet. PRB's 2017 World  
3 Population Data Sheet.
- 4 2. Statistics Canada. Immigration and Ethnocultural Diversity in Canada. National  
5 Household Survey, 2011. National Household Survey, 2011. doi:99-010-X2011001
- 6 3. UK Office for National Statistics. Ethnicity and National Identity in England and Wales.  
7 [Http://Www.Ons.Gov.Uk](http://www.ons.gov.uk).
- 8 4. Hoeffel EM, Rastogi S, Kim MO, Shahid H. The Asian Population: 2010. *2010 Census  
9 Briefs*. 2012;(March):1-23.
- 10 5. Anand SS, Yusuf S, Vuksan V, et al. Differences in risk factors, atherosclerosis, and  
11 cardiovascular disease between ethnic groups in Canada: the Study of Health Assessment  
12 and Risk in Ethnic groups (SHARE). *Lancet*. 2000;356(9226):279-284.  
13 doi:10.1016/S0140-6736(00)02502-2
- 14 6. Lear SA, Humphries KH, Kohli S, Chockalingam A, Frohlich JJ, Birmingham CL.  
15 Visceral adipose tissue accumulation differs according to ethnic background: Results of  
16 the Multicultural Community Health Assessment Trial (M-CHAT). *Am J Clin Nutr*.  
17 2007;86(2):353-359.
- 18 7. J Eyre EL, Duncan MJ, Nevill A. South Asian Children Have Increased Body Fat in  
19 Comparison to White Children at the Same Body Mass Index.  
20 doi:10.3390/children4110102
- 21 8. WHO. *A Global Brief on Hypertension*.; 2013. doi:10.1136/bmj.1.4815.882-a
- 22 9. Chen X, Wang Y. Tracking of blood pressure from childhood to adulthood: A systematic  
23 review and meta-regression analysis. *Circulation*. 2008;117(25):3171-3180.  
24 doi:10.1161/CIRCULATIONAHA.107.730366
- 25 10. Soudarssanane M, Mathanraj S, Sumanth M, Sahai A, Karthigeyan M. Tracking of blood  
26 pressure among adolescents and young adults in an urban slum of puducherry. *Indian J  
27 Community Med*. 2008;33(2):107-112. doi:10.4103/0970-0218.40879
- 28 11. Jafar TH, Islam M, Poulter N, et al. Children in South Asia have higher body mass-  
29 adjusted blood pressure levels than white children in the United States: a comparative  
30 study. *Circulation*. 2005;111(10):1291-1297. doi:10.1161/01.CIR.0000157699.87728.F1
- 31 12. Henderson EJ, Jones CHD, Hornby-Turner YC, Pollard TM. Adiposity and blood pressure  
32 in 7- to 11-year-old children: Comparison of British Pakistani and white British children,  
33 and of British Pakistani children of migrant and British-born mothers. *Am J Hum Biol*.  
34 2011;23(5):710-716. doi:10.1002/ajhb.21204
- 35 13. Fowokan AO, Sakakibara BM, Onsel N, et al. Correlates of elevated blood pressure in  
36 healthy children: a systematic review. *Clin Obes*. July 2018. doi:10.1111/cob.12271

- 1  
2  
3 1 14. Stunkard AJ. Use of the Danish Adoption Register for the study of obesity and thinness.  
4 2 *Res Publ Assoc Res Nerv Ment Dis.* 1983;60:115-120.  
5 3 <https://ci.nii.ac.jp/naid/10025281459/>. Accessed August 8, 2018.  
6  
7 4 15. Lo WS, Ho SY, Mak KK, Lam TH. The Use of Stunkard's Figure Rating Scale to Identify  
8 5 Underweight and Overweight in Chinese Adolescents. *PLoS One.* 2012;7(11).  
9 6 doi:10.1371/journal.pone.0050017  
10  
11 7 16. Birch L., Fisher J., Grimm-Thomas K, Markey C., Sawyer R, Johnson S. Confirmatory  
12 8 factor analysis of the Child Feeding Questionnaire: a measure of parental attitudes, beliefs  
13 9 and practices about child feeding and obesity proneness. *Appetite.* 2001;36(3):201-210.  
14 10 doi:10.1006/APPE.2001.0398  
15  
16 11 17. Rivara F, Menestrel S Le, Prevention C on the B and PE of PVL for B, et al. *Preventing*  
17 12 *Bullying Through Science, Policy, and Practice.* National Academies Press (US); 2016.  
18 13 doi:10.17226/23482  
19  
20 14 18. Stigler M, Dhavan P, Van Dusen D, Arora M, Reddy KS, Perry CL. Westernization and  
21 15 tobacco use among young people in Delhi, India. *Soc Sci Med.* 2010;71(5):891-897.  
22 16 doi:10.1016/j.socscimed.2010.06.002  
23  
24 17 19. Iqbal R, Anand S, Ounpuu S, et al. Dietary patterns and the risk of acute myocardial  
25 18 infarction in 52 countries: Results of the INTERHEART study. *Circulation.*  
26 19 2008;118(19):1929-1937. doi:10.1161/CIRCULATIONAHA.107.738716  
27  
28 20 20. Roberts HC, Denison HJ, Martin HJ, et al. A review of the measurement of grip strength  
29 21 in clinical and epidemiological studies: Towards a standardised approach. *Age Ageing.*  
30 22 2011;40(4):423-429. doi:10.1093/ageing/afr051  
31  
32 23 21. de Onis M, Onyango AW, Borghi E, Siyam A, Nishida C, Siekmann J. Development of a  
33 24 WHO growth reference for school-aged children and adolescents. *Bull World Health*  
34 25 *Organ.* 2007;85(9):660-667. doi:10.2471/blt.07.043497  
35  
36 26 22. Sharma AK, Metzger DL, Daymont C, Hadjiyannakis S, Rodd CJ. LMS tables for waist-  
37 27 circumference and waist-height ratio Z-scores in children aged 5–19 y in NHANES III:  
38 28 association with cardio-metabolic risks. 2015;78:Pediatric Research.  
39 29 <http://www.nature.com/pr/journal/v78/n6/full/pr2015160a.html>. Accessed July 27, 2017.  
40  
41 30 23. National High Blood Pressure Education Program Working Group on High Blood. The  
42 31 fourth report on the diagnosis, evaluation, and treatment of high blood pressure in children  
43 32 and adolescents. *Pediatrics.* 2004;114(2 Suppl 4th Report):555-576.  
44 33 doi:10.1542/peds.114.2.S2.555  
45  
46 34 24. von Elm E, Altman DG, Egger M, et al. The Strengthening the Reporting of Observational  
47 35 Studies in Epidemiology (STROBE) statement: guidelines for reporting observational  
48 36 studies. *J Clin Epidemiol.* 2008;61(4):344-349. doi:10.1016/j.jclinepi.2007.11.008  
49  
50 37 25. Din-Dzietham R, Liu Y, Bielo MV, Shamsa F. High blood pressure trends in children and  
51 38 adolescents in national surveys, 1963 to 2002. *Circulation.* 2007;116(13):1488-1496.  
52  
53  
54  
55  
56  
57  
58  
59  
60



- 1  
2  
3  
4  
5  
6  
7  
8  
9  
10  
11  
12  
13  
14  
15  
16  
17  
18  
19  
20  
21  
22  
23  
24  
25  
26  
27  
28  
29  
30  
31  
32  
33  
34  
35  
36  
37  
38  
39  
40  
41  
42  
43  
44  
45  
46  
47  
48  
49  
50  
51  
52  
53  
54  
55  
56  
57  
58  
59  
60
- 1 doi:10.1161/CIRCULATIONAHA.106.683243
- 2 26. Genovesi S, Antolini L, Gallieni M, et al. High prevalence of hypertension in normal and  
3 underweight Indian children. *J Hypertens*. 2011;29(2):217-221.  
4 doi:10.1097/HJH.0b013e3283407fe3
- 5 27. Statistics Canada. Blood pressure of Canadian children and youth, 2009 to 2011.  
6 <http://www.statcan.gc.ca/pub/82-625-x/2012001/article/11713-eng.htm>. Accessed August  
7 30, 2017.
- 8 28. Huntington-Moskos L, Turner-Henson A, Rice M. Tobacco exposure, weight status, and  
9 elevated blood pressure in adolescents. *J Community Health*. 2014;39(4):653-659.  
10 doi:10.1007/s10900-014-9839-5
- 11 29. Leung LCK, Sung RYT, So H-K, et al. Prevalence and risk factors for hypertension in  
12 Hong Kong Chinese adolescents: waist circumference predicts hypertension, exercise  
13 decreases risk. *Arch Dis Child*. 2011;96(9):804-809. doi:10.1136/adc.2010.202770
- 14 30. Gillis EE, Sullivan JC. Sex Differences in Hypertension: Recent Advances. *Hypertension*.  
15 2016;68(6):1322-1327. doi:10.1161/HYPERTENSIONAHA.116.06602
- 16 31. Goel M, Pal P, Agrawal A, Ashok C. Relationship of body mass index and other life style  
17 factors with hypertension in adolescents. *Ann Pediatr Cardiol*. 2016;9(1):29.  
18 doi:10.4103/0974-2069.171393
- 19 32. Moser DC, Giuliano I de CB, Titski ACK, Gaya AR, Coelho-e-Silva MJ, Leite N.  
20 Anthropometric measures and blood pressure in school children. *J Pediatr (Rio J)*.  
21 2013;89(3):243-249. doi:10.1016/j.jped.2012.11.006
- 22 33. Flores-Huerta S, Klünder-Klünder M, Reyes de la Cruz L, Santos JI. Increase in Body  
23 Mass Index and Waist Circumference Is Associated with High Blood Pressure in Children  
24 and Adolescents in Mexico City. *Arch Med Res*. 2009;40(3):208-215.  
25 doi:10.1016/j.arcmed.2009.02.009
- 26 34. Wang H, Necheles J, Carnethon M, et al. Adiposity measures and blood pressure in  
27 Chinese children and adolescents. *Arch Dis Child*. 2008;93(9):738-744.  
28 doi:10.1136/adc.2007.127589
- 29 35. Mirzaei M, Taylor R, Morrell S, Leeder SR. Predictors of blood pressure in a cohort of  
30 school-aged children. *Eur J Cardiovasc Prev Rehabil*. 2007;14(5):624-629.  
31 doi:10.1097/HJR.0b013e32828621c6
- 32 36. Lurbe E, Torro I, Rodríguez C, Alvarez V, Redón J. Birth weight influences blood  
33 pressure values and variability in children and adolescents. *Hypertens (Dallas, Tex 1979)*.  
34 2001;38(3):389-393. <http://www.ncbi.nlm.nih.gov/pubmed/11566910>. Accessed January  
35 17, 2017.
- 36 37. Pescatello LS, MacDonald H V., Lamberti L, Johnson BT. Exercise for Hypertension: A  
37 Prescription Update Integrating Existing Recommendations with Emerging Research.  
38 *Curr Hypertens Rep*. 2015;17(11). doi:10.1007/s11906-015-0600-y



- 1  
2  
3 1 38. Dong B, Wang Z, Arnold L, Song Y, Wang HJ, Ma J. The association between blood  
4 2 pressure and grip strength in adolescents: Does body mass index matter. *Hypertens Res.*  
5 3 2016;39(12):919-925. doi:10.1038/hr.2016.84  
6  
7 4 39. Zhang R, Li C, Liu T, Zheng L, Li S. Handgrip Strength and Blood Pressure in Children  
8 5 and Adolescents: Evidence from. 2011;31(July):792-796.  
9 6 doi:10.1093/ajh/hpy032/4883259  
10  
11 7 40. Van kova I, Maletinska L, Behuliak M, Nagelova V, Zicha J, Kune J. Obesity-related  
12 8 hypertension: possible pathophysiological mechanisms. *J Endocrinol.* 2014;223(3):R63-  
13 9 R78. doi:10.1530/JOE-14-0368  
14  
15 10 41. Roth J V. Taller People Should Have as Their Normal a Higher Body Mass Index.  
16 11 *Anesthesiology.* 2018;128(2):424. doi:10.1097/ALN.0000000000001998  
17  
18 12 42. Spruill T. Chronic Psychological Stress and Hypertension. *Curr Hypertens Rep.*  
19 13 2013;12(1):10-16. doi:10.1007/s11906-009-0084-8.Chronic  
20  
21 14 43. Vehaskari VM. Heritable forms of hypertension. *Pediatr Nephrol.* 2009;24(10):1929-  
22 15 1937. doi:10.1007/s00467-007-0537-8  
23  
24 16 44. Ehret GB. Genome-wide association studies: contribution of genomics to understanding  
25 17 blood pressure and essential hypertension. *Curr Hypertens Rep.* 2010;12(1):17-25.  
26 18 doi:10.1007/s11906-009-0086-6  
27  
28  
29  
30  
31  
32  
33  
34 21  
35  
36  
37  
38  
39  
40  
41  
42  
43  
44  
45  
46  
47  
48  
49  
50  
51  
52  
53  
54  
55  
56  
57  
58  
59  
60

1 Table 1: Physiological, lifestyle and sociodemographic characteristics of South Asian children  
 2 stratified by sex.

|                                                                    | Total (n=762) | Boy (n=360) | Girl (n=402) | p value |
|--------------------------------------------------------------------|---------------|-------------|--------------|---------|
| Age (years)                                                        | 9.5 ± 3.0     | 9.3 ± 2.8   | 9.7 ± 3.1    | 0.09    |
| Paternal education                                                 |               |             |              | 0.92    |
| No formal education                                                | 5 (1%)        | 3 (1%)      | 2 (1%)       |         |
| Primary education                                                  | 247 (34%)     | 115 (34%)   | 132 (35%)    |         |
| Trade school                                                       | 21 (3%)       | 9 (3%)      | 12 (3%)      |         |
| College/university                                                 | 444 (62%)     | 209 (62%)   | 235 (62%)    |         |
| Maternal education                                                 |               |             |              | 0.363   |
| No formal education                                                | 5 (1%)        | 4 (1%)      | 1 (0%)       |         |
| Primary education                                                  | 223 (30%)     | 103 (30%)   | 120 (31%)    |         |
| Trade school                                                       | 6 (1%)        | 4 (1%)      | 2 (1%)       |         |
| College/university                                                 | 503 (68%)     | 235 (68%)   | 268 (69%)    |         |
| Acculturation score (western)                                      | 34.8 ± 4.7    | 34.6 ± 4.62 | 34.9 ± 4.74  | 0.426   |
| Acculturation score (traditional)                                  | 26.7 ± 4.43   | 26.3 ± 4.35 | 27.1 ± 4.48  | 0.02    |
| Daily physical activity in school (METmins/day)                    | 35.7 ± 25.8   | 36.8 ± 27.0 | 34.8 ± 24.7  | 0.288   |
| Daily physical activity outside school (METmins/day)               | 15.9 ± 33.9   | 18.5 ± 31.3 | 13.5 ± 35.9  | 0.04    |
| Daily intake- servings of fruit and vegetables (daily mean intake) | 3.16 ± 1.86   | 3.11 ± 1.81 | 3.21 ± 1.91  | 0.485   |
| Daily intake- servings of fast foods (daily mean intake)           | 0.91 ± 0.78   | 0.86 ± 0.59 | 0.97 ± 0.91  | 0.067   |
| Total daily intake- servings                                       | 12.0 ± 4.48   | 12.2 ± 4.9  | 11.8 ± 4.1   | 0.243   |
| Exposure to bullying/violence at school                            |               |             |              | 0.025   |
| Yes                                                                | 233 (34%)     | 126 (38%)   | 107 (30%)    |         |

|                                  |                     |              |              |              |        |
|----------------------------------|---------------------|--------------|--------------|--------------|--------|
|                                  | No                  | 459 (66%)    | 207 (62%)    | 252 (70%)    |        |
| Exposure to second hand smoking* |                     |              |              |              | 0.616  |
|                                  | None                | 712 (94%)    | 336 (94%)    | 376 (94%)    |        |
|                                  | 1-2 times/week      | 33 (4%)      | 16 (5%)      | 17 (4%)      |        |
|                                  | 3-6 times/week      | 5 (1%)       | 2 (1%)       | 3 (1%)       |        |
|                                  | At least once a day | 7 (1%)       | 5 (1%)       | 2 (1%)       |        |
|                                  | 2-3 times/day       | 1 (0%)       | 0 (0%)       | 1 (0%)       |        |
| Mother's history of hypertension |                     |              |              |              | 0.047  |
|                                  | Yes                 | 12 (4%)      | 9 (7%)       | 3 (2%)       |        |
|                                  | No                  | 280 (96%)    | 128 (93%)    | 152 (98%)    |        |
| Father's history of hypertension |                     |              |              |              | 0.979  |
|                                  | Yes                 | 30 (10%)     | 14 (10%)     | 16 (10%)     |        |
|                                  | No                  | 260 (90%)    | 122 (90%)    | 138 (90%)    |        |
| Height (cm)                      |                     | 138.3 ± 16.5 | 139.1 ± 17.6 | 137.7 ± 15.5 | 0.22   |
| Weight (kg)                      |                     | 36.5 ± 15.8  | 36.9 ± 16.5  | 36.1 ± 15.3  | 0.46   |
| BMI Z score                      |                     | 0.48 ± 1.44  | 0.57 ± 1.61  | 0.40 ± 1.28  | 0.11   |
| WC Z score                       |                     | -0.06 ± 1.23 | 0.11 ± 0.36  | -0.21 ± 1.24 | <0.001 |
| WHtR Z score                     |                     | -0.38 ± 1.24 | -0.27 ± 1.27 | -0.48 ± 1.21 | 0.02   |
| Heart rate                       |                     | 87 ± 12      | 86 ± 12      | 87 ± 13      | 0.047  |
| SBP Z score                      |                     | 0.57 ± 0.97  | 0.70 ± 0.99  | 0.46 ± 0.95  | 0.001  |
| DBP Z score                      |                     | 0.37 ± 0.71  | 0.35 ± 0.68  | 0.39 ± 0.73  | 0.41   |
| SBP (non-transformed)            |                     | 109 ± 11     | 111 ± 12     | 107 ± 10     | <0.001 |

|                        |          |          |         |       |
|------------------------|----------|----------|---------|-------|
| DBP (non-transformed)  | 65 ± 8   | 65 ± 8   | 65 ± 8  | 0.849 |
| Systolic hypertension  | 90 (12%) | 54 (15%) | 36 (9%) | 0.01  |
| Diastolic hypertension | 31 (4%)  | 13 (4%)  | 18 (5%) | 0.55  |

1 \*Exposure defined as a minimum of five consecutive minutes during which inhalation of other  
 2 people's smoke occurs  
 3 BP=Blood pressure, BMI=body mass index, WC= waist circumference, WHtR= waist to height  
 4 ratio, SBP= systolic blood pressure, DBP= diastolic blood pressure  
 5  
 6  
 7  
 8

For peer review only

1 Table 2: Adjusted linear regression between multifactorial risk factors with systolic and diastolic  
 2 BP z scores

|                                         | Systolic BP z score              | Diastolic BP z score             |
|-----------------------------------------|----------------------------------|----------------------------------|
| Age <sup>a</sup>                        | -0.054 (-0.078, -0.029), p<0.001 | -0.057 (-0.075, -0.039), p<0.001 |
| Female sex (vs Male) <sup>b</sup>       | -0.208 (-0.350, -0.067), p=0.004 | 0.078 (-0.023, 0.179), p=0.132   |
| Height                                  | 0.022 (0.011, 0.033), p<0.001    | 0.007 (-0.001, 0.015), p=0.077   |
| Weight                                  | 0.047 (0.040, 0.055), p<0.001    | 0.022 (0.016, 0.027), p<0.001    |
| BMI z score                             | 0.292 (0.249, 0.336), p<0.001    | 0.160 (0.127, 0.193), p<0.001    |
| WC z score                              | 0.273 (0.219, 0.326), p<0.001    | 0.137 (0.098, 0.177), p<0.001    |
| WHtR z score                            | 0.289 (0.236, 0.342), p<0.001    | 0.153 (0.114, 0.192), p<0.001    |
| Heart rate                              | 0.016 (0.010, 0.022), p<0.001    | 0.015 (0.011, 0.019), p<0.001    |
| Acculturation (western score)           | -0.010 (-0.026, 0.006), p=0.211  | -0.005 (-0.016, 0.006), p=0.373  |
| Acculturation (traditional score)       | 0.010 (-0.006, 0.026), p=0.227   | 0.003 (-0.008, 0.015), p=0.582   |
| Child's perception of body image        | 0.183 (0.128, 0.239), p<0.001    | 0.104 (0.064, 0.144), p<0.001    |
| Exposure to bullying/violence at school | 0.021 (-0.138, 0.181), p=0.794   | -0.071 (-0.183, 0.042), p=0.218  |
| Father's smoking status                 | 0.118 (-0.056, 0.292), p=0.184   | 0.082 (-0.053, 0.218), p=0.233   |
| Exposure to second hand smoke           | -0.052 (-0.240, 0.136), p=0.587  | 0.018 (-0.117, 0.152), p=0.795   |
| Father's history of                     | -0.127 (-0.484, 0.230), p=0.484  | -0.063 (-0.336, 0.209), p=0.648  |

|                                                        |                                 |                                 |
|--------------------------------------------------------|---------------------------------|---------------------------------|
| hypertension                                           |                                 |                                 |
| Mother's history of hypertension                       | -0.003 (-0.524, 0.518), p=0.991 | 0.354 (-0.042, 0.750), p=0.079  |
| Grip strength (non-dominant hand)                      | 0.025 (0.007, 0.043), p=0.007   | 0.006 (-0.007, 0.019), p=0.381  |
| Daily physical activity in school (METmins/day)        | 0.005 (0.002, 0.008), p=0.003   | 0.003 (0.001, 0.005), p=0.009   |
| Daily physical activity outside school (METmins/day)   | 0.001 (-0.001, 0.003), p=0.363  | 0.000 (-0.002, 0.002), p=0.994  |
| Daily intake- fruit and vegetables (daily mean intake) | -0.008 (-0.049, 0.033), p=0.717 | -0.011 (-0.040, 0.018), p=0.466 |
| Daily intake-fast foods (daily mean intake)            | 0.004 (-0.086, 0.093), p=0.937  | -0.053 (-0.117, 0.011), p=0.104 |

1 *Model adjusted for age, sex and father's education*

2 *Values presented are  $\beta$  (95% confidence intervals), and p values*

3 *BMI= body mass index, WC= waist circumference, WHtR= waist to height ratio, BP =blood pressure, MET=Metabolic equivalent of task*

4 *<sup>a</sup>Age was adjusted for sex and father's education*

5 *<sup>b</sup>Sex was for adjusted for age and father's education*

6

7

8

9

10

11

12

13

14

15

16

17

18

19

20

21

22

1 Table 3: Stepwise linear regression analysis showing the aggregate correlates of BP z-score in  
 2 South Asian children

| Stepwise multiple linear regression models |                        |        |                |         |                         |
|--------------------------------------------|------------------------|--------|----------------|---------|-------------------------|
|                                            | Variable               | B      | 95%            | P value | Adjusted R <sup>2</sup> |
| Systolic BP z-score                        | Child's age            | -0.132 | -0.202, -0.062 | <0.001  | 0.294                   |
|                                            | Sex                    | -0.293 | -0.461, -0.126 | 0.001   |                         |
|                                            | BMI z-score            | 0.125  | 0.022, 0.228   | 0.017   |                         |
|                                            | Heart rate             | 0.014  | 0.007, 0.021   | <0.001  |                         |
|                                            | Weight                 | 0.027  | 0.012, 0.041   | <0.001  |                         |
| Diastolic BP z-score                       | Child's age            | -0.027 | -0.048, -0.007 | 0.01    | 0.228                   |
|                                            | BMI z-score            | 0.125  | 0.081, 0.170   | <0.001  |                         |
|                                            | Heart rate             | 0.015  | 0.010, 0.021   | <0.001  |                         |
|                                            | Daily fast food intake | -0.013 | -0.028, 0.001  | 0.072   |                         |

3 *BMI=body mass index, BP= blood pressure*

4  
5

1  
2  
3 1 Figure 1: Adjusted odds ratio for the association between the multifactorial variables with  
4 2 systolic hypertension  
5  
6  
7 3  
8 4  
9 5  
10 6  
11 7  
12 8  
13 9  
14 10  
15 11  
16 12  
17 13  
18 14  
19 15  
20 16  
21 17  
22 18  
23 19  
24 20  
25 21  
26 22  
27 23  
28 24  
29 25  
30  
31  
32  
33  
34  
35  
36  
37  
38  
39  
40  
41  
42  
43  
44  
45  
46  
47  
48  
49  
50  
51  
52  
53  
54  
55  
56  
57  
58  
59  
60

For peer review only



1  
2  
3  
4  
5  
6  
7  
8  
9  
10  
11  
12  
13  
14  
15  
16  
17  
18  
19  
20  
21  
22  
23  
24  
25  
26  
27  
28  
29  
30  
31  
32  
33  
34  
35  
36  
37  
38  
39  
40  
41  
42  
43  
44  
45  
46  
47  
48  
49  
50  
51  
52  
53  
54  
55  
56  
57  
58  
59  
60

1 Figure 2: Adjusted odds ratio for the association between the multifactorial variables with  
2 diastolic hypertension

For peer review only



Model adjusted for age, sex and father's education

Values presented are odds ratio (95% confidence intervals)

BMI= body mass index, WC= waist circumference, WHtR= waist to height ratio, BP =blood pressure

\*compared to males

1  
2  
3  
4  
5  
6  
7  
8  
9  
10  
11  
12  
13  
14  
15  
16  
17  
18  
19  
20  
21  
22  
23  
24  
25  
26  
27  
28  
29  
30  
31  
32  
33  
34  
35  
36  
37  
38  
39  
40  
41  
42  
43  
44  
45  
46  
47  
48  
49  
50  
51  
52  
53  
54  
55  
56  
57  
58  
59  
60

For peer review only



*Model adjusted for age, sex and father's education*

*Values presented are odds ratio (95% confidence intervals)*

*BMI= body mass index, WC= waist circumference, WHtR= waist to height ratio, BP =blood pressure*

STROBE Statement—Checklist of items that should be included in reports of *cross-sectional studies*

|                              | Item No                                                                            | Recommendation                                                                                                                                                                                               | Page No |
|------------------------------|------------------------------------------------------------------------------------|--------------------------------------------------------------------------------------------------------------------------------------------------------------------------------------------------------------|---------|
| <b>Title and abstract</b>    | 1                                                                                  | (a) Indicate the study's design with a commonly used term in the title or the abstract                                                                                                                       | 1-2     |
|                              |                                                                                    | (b) Provide in the abstract an informative and balanced summary of what was done and what was found                                                                                                          | 2       |
| <b>Introduction</b>          |                                                                                    |                                                                                                                                                                                                              |         |
| Background/rationale         | 2                                                                                  | Explain the scientific background and rationale for the investigation being reported                                                                                                                         | 3       |
| Objectives                   | 3                                                                                  | State specific objectives, including any prespecified hypotheses                                                                                                                                             | 3-4     |
| <b>Methods</b>               |                                                                                    |                                                                                                                                                                                                              |         |
| Study design                 | 4                                                                                  | Present key elements of study design early in the paper                                                                                                                                                      | 4       |
| Setting                      | 5                                                                                  | Describe the setting, locations, and relevant dates, including periods of recruitment, exposure, follow-up, and data collection                                                                              | 4       |
| Participants                 | 6                                                                                  | (a) Give the eligibility criteria, and the sources and methods of selection of participants                                                                                                                  | 4       |
| Variables                    | 7                                                                                  | Clearly define all outcomes, exposures, predictors, potential confounders, and effect modifiers. Give diagnostic criteria, if applicable                                                                     | 5-8     |
| Data sources/<br>measurement | 8*                                                                                 | For each variable of interest, give sources of data and details of methods of assessment (measurement). Describe comparability of assessment methods if there is more than one group                         | 5-8     |
| Bias                         | 9                                                                                  | Describe any efforts to address potential sources of bias                                                                                                                                                    | 5       |
| Study size                   | 10                                                                                 | Explain how the study size was arrived at                                                                                                                                                                    |         |
| Quantitative variables       | 11                                                                                 | Explain how quantitative variables were handled in the analyses. If applicable, describe which groupings were chosen and why                                                                                 | 8       |
| Statistical methods          | 12                                                                                 | (a) Describe all statistical methods, including those used to control for confounding                                                                                                                        | 8-9     |
|                              |                                                                                    | (b) Describe any methods used to examine subgroups and interactions                                                                                                                                          | N/A     |
|                              | (c) Explain how missing data were addressed                                        | 7                                                                                                                                                                                                            |         |
|                              | (d) If applicable, describe analytical methods taking account of sampling strategy | N/A                                                                                                                                                                                                          |         |
|                              | (e) Describe any sensitivity analyses                                              | N/A                                                                                                                                                                                                          |         |
| <b>Results</b>               |                                                                                    |                                                                                                                                                                                                              |         |
| Participants                 | 13*                                                                                | (a) Report numbers of individuals at each stage of study—eg numbers potentially eligible, examined for eligibility, confirmed eligible, included in the study, completing follow-up, and analysed            | 9       |
|                              |                                                                                    | (b) Give reasons for non-participation at each stage                                                                                                                                                         | N/A     |
|                              |                                                                                    | (c) Consider use of a flow diagram                                                                                                                                                                           | N/A     |
| Descriptive data             | 14*                                                                                | (a) Give characteristics of study participants (eg demographic, clinical, social) and information on exposures and potential confounders                                                                     | 9       |
|                              |                                                                                    | (b) Indicate number of participants with missing data for each variable of interest                                                                                                                          | 24      |
| Outcome data                 | 15*                                                                                | Report numbers of outcome events or summary measures                                                                                                                                                         | 9       |
| Main results                 | 16                                                                                 | (a) Give unadjusted estimates and, if applicable, confounder-adjusted estimates and their precision (eg, 95% confidence interval). Make clear which confounders were adjusted for and why they were included | 8-11    |

|                          |    |                                                                                                                                                                            |     |
|--------------------------|----|----------------------------------------------------------------------------------------------------------------------------------------------------------------------------|-----|
|                          |    | (b) Report category boundaries when continuous variables were categorized                                                                                                  | N/A |
|                          |    | (c) If relevant, consider translating estimates of relative risk into absolute risk for a meaningful time period                                                           | N/A |
| Other analyses           | 17 | Report other analyses done—eg analyses of subgroups and interactions, and sensitivity analyses                                                                             | N/A |
| <b>Discussion</b>        |    |                                                                                                                                                                            |     |
| Key results              | 18 | Summarise key results with reference to study objectives                                                                                                                   | 12  |
| Limitations              | 19 | Discuss limitations of the study, taking into account sources of potential bias or imprecision. Discuss both direction and magnitude of any potential bias                 | 16  |
| Interpretation           | 20 | Give a cautious overall interpretation of results considering objectives, limitations, multiplicity of analyses, results from similar studies, and other relevant evidence | 17  |
| Generalisability         | 21 | Discuss the generalisability (external validity) of the study results                                                                                                      | 16  |
| <b>Other information</b> |    |                                                                                                                                                                            |     |
| Funding                  | 22 | Give the source of funding and the role of the funders for the present study and, if applicable, for the original study on which the present article is based              | 18  |

\*Give information separately for exposed and unexposed groups.

**Note:** An Explanation and Elaboration article discusses each checklist item and gives methodological background and published examples of transparent reporting. The STROBE checklist is best used in conjunction with this article (freely available on the Web sites of PLoS Medicine at <http://www.plosmedicine.org/>, Annals of Internal Medicine at <http://www.annals.org/>, and Epidemiology at <http://www.epidem.com/>). Information on the STROBE Initiative is available at [www.strobe-statement.org](http://www.strobe-statement.org).
